# Supplementary material for: One-pot synthesis of highly functionalized pyrimido[1,2-b]indazoles via 6-endo-dig cyclization
Source: Royal Society of Chemistry journal article supplement (doi:10.1039/c6ra02596j), 2016-01-01

### Supporting Information

#### **One pot synthesis of highly functionalized pyrimido[1, 2-b]indazoles via 6-endo-dig cyclization**

Jeyakannu Palaniraja,<sup>a</sup> Selvaraj Mohana Roopan<sup>a\*</sup> and G Mokesh Rayalu<sup>b</sup>

<sup>†</sup>Chemistry of Heterocycles & Natural Product Research Laboratory, Department of Chemistry, School of Advanced Sciences, VIT University, Vellore 632 014, Tamilnadu, India.

<sup>‡</sup>Department of Mathematics, School of Advanced Sciences, VIT University, Vellore 632 014, Tamilnadu, India.

\*Corresponding author. Tel.: +91 98656 10356; +91 04162 202352; fax: +91 416 224 5544/5766.  
E-mail address: [mohanaroopan.s@gmail.com](mailto:mohanaroopan.s@gmail.com);

| S.No | Contents                                                             | Pages |
|------|----------------------------------------------------------------------|-------|
| 1.   | Experimental section                                                 | 2-3   |
| 2.   | Figure S1                                                            | 3     |
| 3.   | Figure S2                                                            | 4     |
| 4.   | Figure S3                                                            | 4     |
| 5.   | Spectral characterization of the compound 4(a-t)                     | 5-9   |
| 6.   | Copies of <sup>1</sup> H NMR, <sup>13</sup> C NMR and HRMS of 4(a-t) | 10-54 |

**Experimental section:**

All commercially available reagents were used without any further purification and the reactions were monitored by TLC.  $^1\text{H}$  and  $^{13}\text{C}$  NMR were obtained using a Bruker Avance 400 Mz spectrometer in  $\text{CDCl}_3$  solvent with TMS as an internal standard. Chemical shift values ( $\delta$ ) were expressed in parts per million (ppm). Abbreviations are as follows: s, singlet; d, doublet; t, triplet; m, multiplet. Melting points were measured on Elchem Microprocessor based DT apparatus using an open capillary tubes and are corrected with benzoic acid. Mass spectra were obtained by high resolution mass spectrometer. UV-vis spectrum was obtained on UV-2550, Shimadzu Corporation, Kyoto, Japan. The fluorescence spectra were obtained on Hitachi F-7000 FL spectrophotometer.

***General procedure for the synthesis of 2,4-diphenylpyrimido [1,2-*b*] indazole 4 (a-q) via metal mediated condition:***

A mixture of 1H-indazol-3-amine (1mmol) , aldehydes (1mmol) and acetylenes (1mmol) in 5 mL of toluene. Then added  $\text{CuSO}_4 \cdot 5\text{H}_2\text{O}$  (21 mol %) followed by *para* -toluene sulphonic acid (10 mol %) in the presence of nitrogen atmosphere. The mixture was refluxed at 121 °C for 8 h 30 min. The progress of the reaction was monitored by TLC. After the completion of the reaction, evaporated the solvent and the crude was purified by column chromatography afford the product as a solid.

**Experimental design & Mathematical model:**

An experimental design for the series of parameters used for the synthesis of 2,4-diphenylpyrimido [1,2-*b*] indazole by two reaction methods such as metal mediated and metal free conditions. The model was built by Response Surface Methodology (RSM) with the Design – Expert Version 9.0.5.1 (State-Ease, Inc., Minneapolis, USA). Levels of selection for each variable based on the results of the preliminary studies. The three components for each reaction method, such as the catalyst loading (A1), reaction temperature (B1) and response time (C1) were utilized for metal mediated reaction.. The actual isolated yields  $Y_1$  was chosen to be the target or response parameter as dependent variables. The  $X_1$  was denoted as predicted isolated yields. Seventeen sets of experiments were performed for each both reaction methods according to Box-Behnken experimental design (BBD). The variables were tested at the three levels by associating negative sign (-1) for lower level, Zero (0) indicating the core value and plus signs (+1) for higher stages (Table 1). The quadratic polynomial equation recommended by RSM was used to predict the optimal value and examine the interaction between the response of experimental design (actual

yield) and the variables (process parameters). The general form of quadratic polynomial was as follows

$$Y = \beta_0 + \beta_1 X_1 + \beta_2 X_2 + \beta_3 X_3 + \beta_{11} X_1^2 + \beta_{22} X_2^2 + \beta_{33} X_3^2 + \beta_{12} X_1 X_2 + \beta_{13} X_1 X_3 + \beta_{23} X_2 X_3$$

Where  $\beta_0$  is constant coefficient of the models. The regression coefficients ( $\beta_1$ ,  $\beta_2$  and  $\beta_3$ ), ( $\beta_{11}$ ,  $\beta_{22}$  and  $\beta_{33}$ ) and ( $\beta_{12}$ ,  $\beta_{13}$  and  $\beta_{23}$ ) respectively represent linear, quadratic and interaction effects of the model estimated by multiple regression analysis.

**Figure S1:** The solvatochromism spectra of the compound 4a.

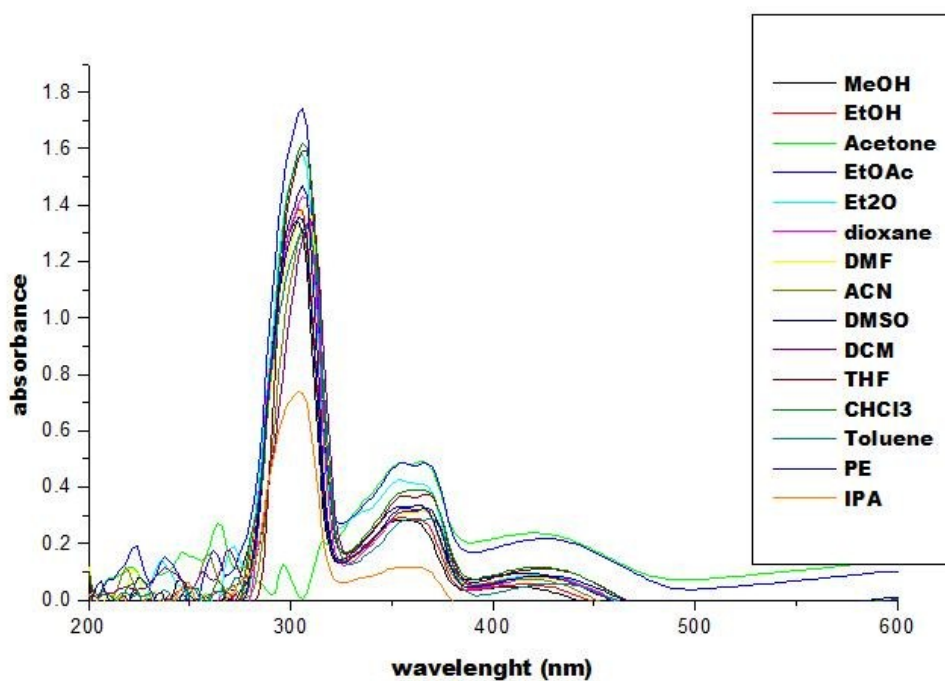

**Figure S2.** UV/Vis absorbance spectra of the pyrimido[1,2-*b*]indazoles 4(a-t) in ethyl acetate.

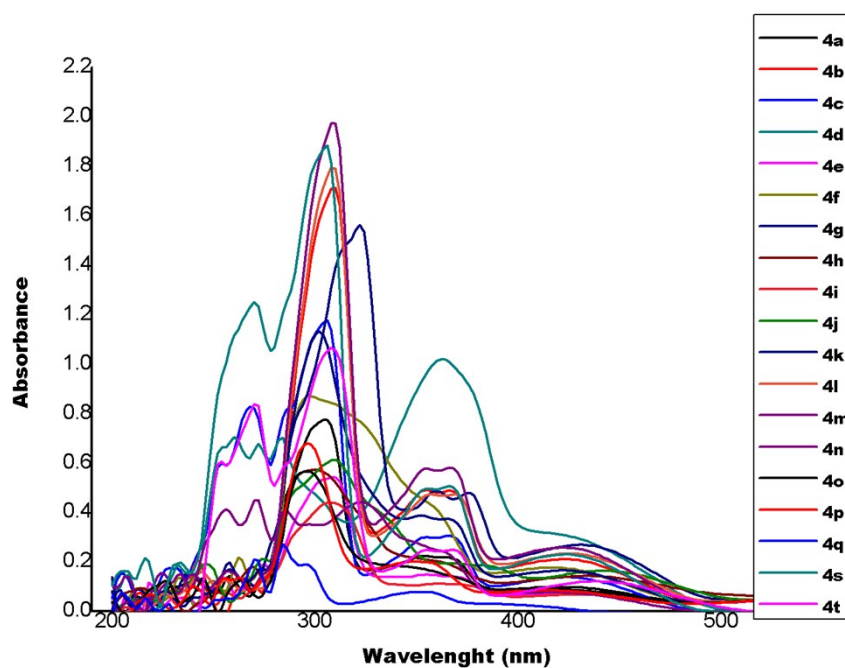

**Figure S3:** Fluorescence emission spectra of the pyrimido[1,2-*b*]indazoles 4(a-t) in ethyl acetate.

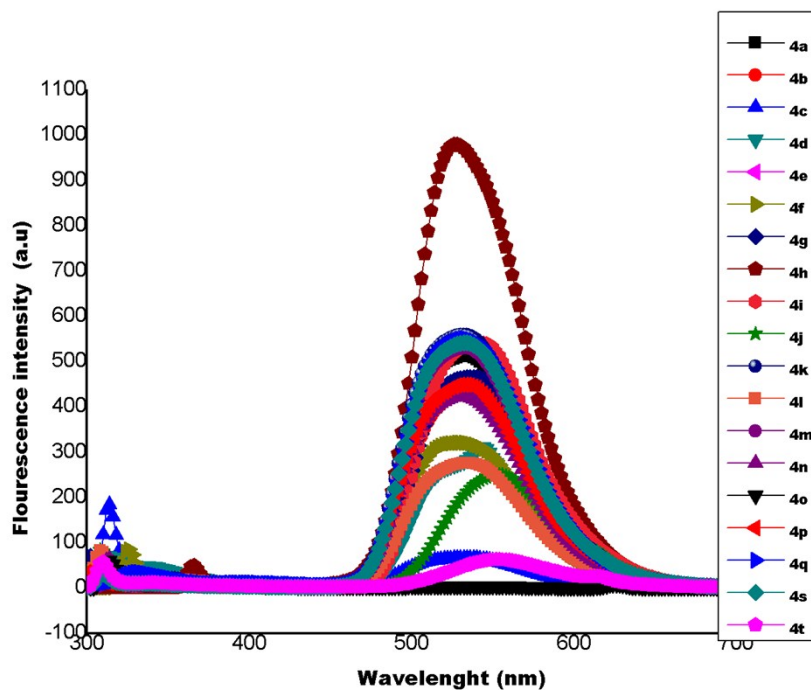

## Spectral characterization of the compound 4(a-t):

### 2,4-diphenylpyrimido[1,2-*b*]indazole (4a)

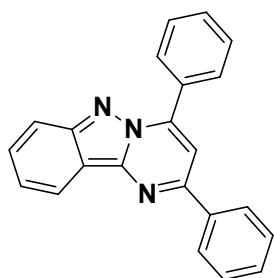

Yellow solid; Isolated yield - 90 %; mp: 154-156 °C; <sup>1</sup>H NMR (400 MHz, CDCl<sub>3</sub>) δ 8.43 (d, *J* = 7.2 Hz, 1H), 8.30-8.27 (m, 2H), 8.23-8.20 (m, 2H), 7.86 (d, *J* = 8.8 Hz, 1H), 7.75 (s, 1H), 7.67-7.50 (m, 7H), 7.33-7.29 (m, 1H); <sup>13</sup>C NMR (100 MHz, CDCl<sub>3</sub>) δ 108.6, 113.9, 116.6, 120.7, 121.2, 127.2, 128.8, 129.0, 129.5, 129.8, 130.1, 131.1, 131.8, 137.3, 145.0, 145.3, 151.6, 152.6; HRMS: *m/z* calcd. for C<sub>22</sub>H<sub>15</sub>N<sub>3</sub> 321.1266 found 321.1256.

### 4-(4-bromophenyl)-2-phenylpyrimido[1,2-*b*]indazole (4b)

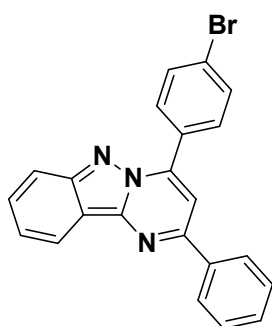

Yellow solid; Isolated yield - 89 %; mp: 170-172 °C; <sup>1</sup>H NMR (400 MHz, CDCl<sub>3</sub>) δ 8.39 (d, *J* = 8.4 Hz, 1H), 8.20-8.12 (m, 4H), 7.86-7.84 (m, 1H), 7.69-7.59 (m, 7H), 7.32-7.29 (m, 1H); <sup>13</sup>C NMR (100 MHz, CDCl<sub>3</sub>) δ 108.1, 113.9, 116.6, 120.9, 121.1, 124.7, 128.6, 128.9, 129.4, 130.0, 131.1, 131.6, 132.2, 136.2, 144.9, 145.3, 151.1, 151.6; HRMS: *m/z* calcd. for C<sub>22</sub>H<sub>14</sub>BrN<sub>3</sub> 399.0371 found 399.0370.

### 4-(4-methoxyphenyl)-2-phenylpyrimido[1,2-*b*]indazole (4c)

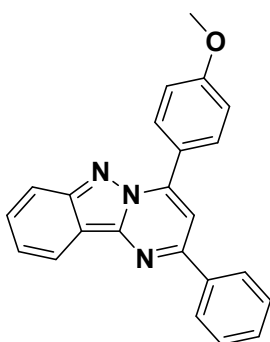

Yellow solid; Isolated yield - 85 %; mp: 170-172 °C; <sup>1</sup>H NMR (400 MHz, CDCl<sub>3</sub>) δ 8.31 (d, *J* = 8.4 Hz, 1H), 8.15-8.10 (m, 3H), 7.74 (d, *J* = 8.8 Hz, 1H), 7.57-7.49 (m, 5H), 7.21-7.17 (m, 1H), 6.97 (d, *J* = 7.6 Hz, 2H), 3.81 (s, 3H); <sup>13</sup>C NMR (100 MHz, CDCl<sub>3</sub>) δ 55.4, 108.1, 113.7, 114.4, 116.5, 120.4, 121.2, 128.6, 128.8, 129.5, 129.7, 129.8, 130.9, 131.9, 145.0, 145.2, 151.5, 152.4, 161.4; HRMS: *m/z* calcd. for C<sub>23</sub>H<sub>17</sub>N<sub>3</sub>O 351.1372 found 351.1371.

### 2-phenyl-4-(thiophen-2-yl)pyrimido[1,2-*b*]indazole (4d)

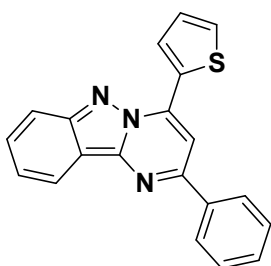

Brown solid; Isolated yield - 81 %; mp: 202-204 °C; <sup>1</sup>H NMR (400 MHz, CDCl<sub>3</sub>) δ 8.41 (d, *J* = 8.0 Hz, 1H), 8.23-8.20 (m, 2H), 7.86-7.82 (m, 2H), 7.69-7.56 (m, 6H), 7.33-7.29 (m, 1H), 7.22-7.21 (m, 1H); <sup>13</sup>C NMR (100 MHz, CDCl<sub>3</sub>) δ 107.5, 113.6, 116.5, 120.6, 121.3, 126.8, 128.4, 128.8, 129.5, 129.9, 131.0, 131.6, 143.2, 144.6, 145.2, 148.0, 151.6; HRMS: *m/z* calcd. for C<sub>20</sub>H<sub>13</sub>N<sub>3</sub>S 327.0830 found 327.0829.

#### 4-(4-chlorophenyl)-2-phenylpyrimido[1,2-*b*]indazole (4e)

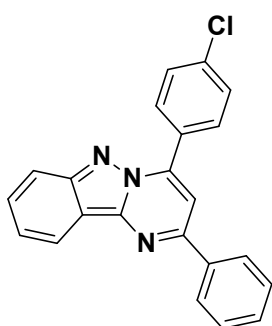

Yellow solid; Isolated yield - 89 %; mp: 202-204 °C; <sup>1</sup>H NMR (400 MHz, CDCl<sub>3</sub>) δ 8.0 (d, *J* = 8.4 Hz, 1H), 8.23-8.19 (m, 4H), 7.85 (d, *J* = 8.4 Hz, 1H), 7.65 (s, 1H), 7.65-7.59 (m, 4H), 7.53-7.51 (m, 2H), 7.31-7.29 (m, 1H); <sup>13</sup>C NMR (100 MHz, CDCl<sub>3</sub>) δ 108.2, 113.2, 116.6, 120.9, 121.1, 128.4, 128.9, 129.2, 129.4, 129.9, 131.1, 131.7, 135.7, 136.3, 144.9, 145.4, 151.1, 151.6; HRMS: *m/z* calcd. for C<sub>22</sub>H<sub>14</sub>N<sub>3</sub>Cl 355.0876 found 355.0875.

#### 4-(2,4-dimethoxyphenyl)-2-phenylpyrimido[1,2-*b*]indazole (4f)

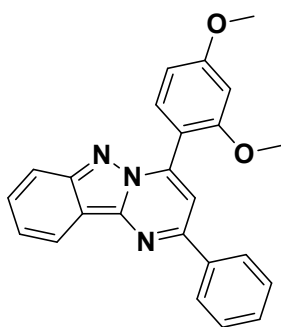

Yellow solid; Isolated yield - 87 %; mp: 160-162 °C; <sup>1</sup>H NMR (400 MHz, CDCl<sub>3</sub>) δ 8.32 (d, *J* = 8.0 Hz, 1H), 8.15-8.14 (m, 2H), 7.92 (s, 1H), 7.76 (d, *J* = 8.4 Hz, 1H), 7.55-7.50 (m, 4H), 7.21-7.18 (m, 2H), 6.66 (d, *J* = 8.4 Hz, 1H), 6.54 (s, 1H), 3.86 (s, 3H), 3.84 (s, 3H); <sup>13</sup>C NMR (100 MHz, CDCl<sub>3</sub>) δ 55.5, 55.8, 99.0, 105.7, 113.0, 113.7, 116.4, 120.0, 120.1, 121.2, 128.7, 129.5, 129.6, 130.6, 132.2, 132.4, 143.8, 144.9, 151.2, 152.0, 158.8, 162.5; HRMS: *m/z* calcd. for C<sub>24</sub>H<sub>19</sub>N<sub>3</sub>O<sub>2</sub> 381.1477 found 381.1477.

#### 4-(furan-2-yl)-2-phenylpyrimido[1,2-*b*]indazole (4g)

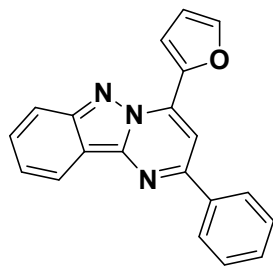

Brown solid; Isolated yield - 79 %; mp: 206-208 °C; <sup>1</sup>H NMR (400 MHz, CDCl<sub>3</sub>) δ 8.38 (d, *J* = 8.0 Hz, 1H), 8.20-8.17 (m, 2H), 7.83-7.79 (m, 2H), 7.65-7.53 (m, 6H), 7.30-7.27 (m, 1H), 7.20-7.18 (m, 1H); <sup>13</sup>C NMR (100 MHz, CDCl<sub>3</sub>) δ 107.5, 113.6, 116.5, 120.6, 121.3, 126.8, 128.4, 128.8, 129.5, 129.9, 131.0, 131.6, 143.2, 144.6, 145.2, 148.0, 151.6; HRMS: *m/z* calcd. for C<sub>20</sub>H<sub>13</sub>N<sub>3</sub>O 311.1059 found 311.1058.

#### *N,N*-dimethyl-4-(2-phenylpyrimido[1,2-*b*]indazol-4-yl)aniline (4h)

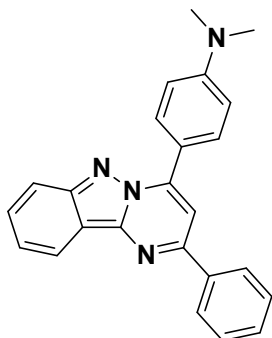

Brown solid; Isolated yield - 84 %; mp: 147-149 °C; <sup>1</sup>H NMR (400 MHz, CDCl<sub>3</sub>) δ 8.31 (d, *J* = 8.4 Hz, 1H), 8.13-8.11 (m, 3H), 8.12 (d, *J* = 8.8 Hz, 1H), 7.57-7.47 (m, 5H), 7.18-7.15 (m, 2H), 7.77 (d, *J* = 7.6 Hz, 2H), 3.01 (s, 6H); <sup>13</sup>C NMR (100 MHz, CDCl<sub>3</sub>) δ 40.2, 107.8, 112.1, 113.6, 116.3, 119.9, 121.3, 124.7, 128.3, 128.7, 129.4, 129.5, 130.7, 132.2, 151.5; HRMS: *m/z* calcd. for C<sub>24</sub>H<sub>20</sub>N<sub>4</sub> 364.1688 found 364.1688.

#### 4-(2-phenylpyrimido[1,2-*b*]indazol-4-yl)benzonitrile (4i)

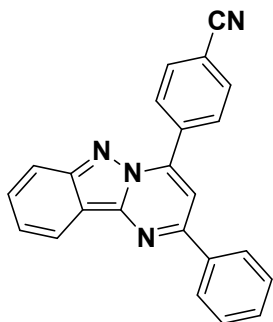

Yellow solid; Isolated yield - 78 %; mp: 252-254 °C; <sup>1</sup>H NMR (400 MHz, CDCl<sub>3</sub>) δ 8.39 (d, *J* = 8.4 Hz, 1H), 8.20-8.12 (m, 4H), 7.86-7.84 (m, 1H), 7.69-7.59 (m, 7H), 7.32-7.29 (m, 1H); <sup>13</sup>C NMR (100 MHz, CDCl<sub>3</sub>) δ 108.1, 113.9, 116.6, 120.9, 121.1, 124.7, 128.6, 128.9, 129.4, 130.0, 131.1, 131.6, 132.2, 136.2, 144.9, 145.3, 151.1, 151.6; HRMS: *m/z* calcd. for C<sub>23</sub>H<sub>14</sub>N<sub>4</sub> 346.1218 found 346.1217.

#### 4-(4-nitrophenyl)-2-phenylpyrimido[1,2-*b*]indazole (4j)

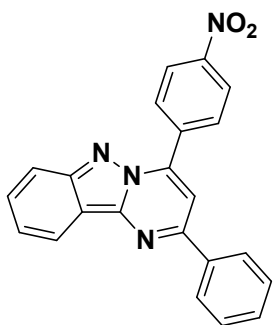

Yellow solid; Isolated yield - 75 %; mp: 272-274 °C; <sup>1</sup>H NMR (400 MHz, CDCl<sub>3</sub>) δ 8.48-8.40 (m, 5H), 8.24-8.22 (m, 2H), 7.90 (d, *J* = 8.8 Hz, 1H), 7.79 (s, 1H), 7.69-7.65 (m, 4H), 7.40-7.36 (m, 1H); <sup>13</sup>C NMR (100 MHz, CDCl<sub>3</sub>) δ 108.4, 114.2, 116.9, 121., 121.5, 124.2, 127.8, 128.9, 129.5, 130.3, 131.3, 143.1, 144.9, 145.5, 148.6, 149.1, 151.8; HRMS: *m/z* calcd. for C<sub>22</sub>H<sub>14</sub>N<sub>4</sub>O<sub>2</sub> 366.1117 found 366.1115.

#### 4-(2-phenylpyrimido[1,2-*b*]indazol-4-yl)phenol (4k)

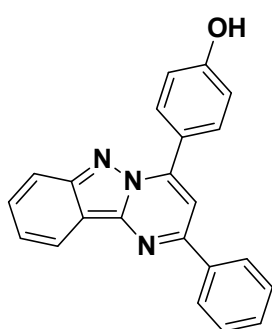

Brown solid; Isolated yield - 80 %; mp: 306-308 °C; <sup>1</sup>H NMR (400 MHz, CDCl<sub>3</sub>) δ 9.76 (s, 1H), 8.36-8.33 (m, 3H), 8.15 (s, 1H), 7.89-7.71 (m, 3H), 7.70-7.63 (m, 4H), 7.42-7.32 (m, 2H), 6.99-6.96 (m, 1H); <sup>13</sup>C NMR (100 MHz, CDCl<sub>3</sub>) δ 108.9, 113.0, 113.7, 116.2, 117.5, 118.2, 120.6, 120.7, 128.4, 129.8, 129.9, 130.0, 130.9, 131.2, 137.9, 144.0, 144.7, 150.6, 152.1, 157.9; HRMS: *m/z* calcd. for C<sub>22</sub>H<sub>15</sub>N<sub>3</sub>O 337.1215 found 337.1214.

#### 4-(4-isopropylphenyl)-2-phenylpyrimido[1,2-*b*]indazole (4l)

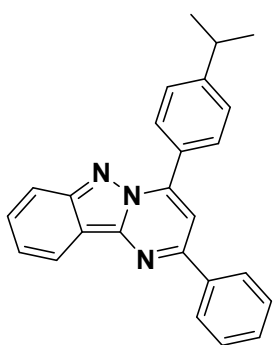

Yellow solid; Isolated yield - 87 %; mp: 156-158 °C; <sup>1</sup>H NMR (400 MHz, CDCl<sub>3</sub>) δ 8.42 (d, *J* = 8.4 Hz, 1H), 8.22-8.19 (m, 4H), 7.84 (d, *J* = 8.8 Hz, 1H), 7.72 (s, 1H), 7.66-7.59 (m, 4H), 7.43-7.41 (m, 2H), 7.31-7.28 (m, 1H), 3.05-2.98 (m 1H), 1.32 (d, *J* = 7.2 Hz, 6H); <sup>13</sup>C NMR (100 MHz, CDCl<sub>3</sub>) δ 23.8, 34.1, 108.5, 113.8, 116.5, 120.5, 121.2, 127.2, 128.8, 129.5, 129.8, 130.9, 131.9, 135.0, 131.9, 135.0, 145.0, 151.3, 151.5, 152.8; HRMS: *m/z* calcd. for C<sub>25</sub>H<sub>21</sub>N<sub>3</sub> 363.1735 found 363.1734.

#### 2-phenyl-4-(p-tolyl)pyrimido[1,2-*b*]indazole (4m)

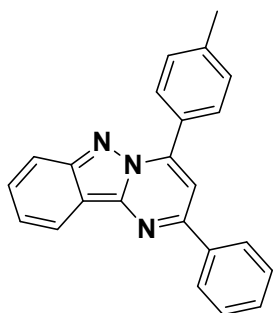

Yellow solid; Isolated yield - 90 %; mp: 202-204 °C; <sup>1</sup>H NMR (400 MHz, CDCl<sub>3</sub>) δ 8.43-8.40 (m, 1H), 8.22-8.17 (m, 4H), 7.84 (d, *J* = 8.8 Hz, 1H), 7.72 (s, 1H), 7.64-7.58 (m, 4H), 7.36 (d, *J* = 8.0 Hz, 2H), 7.31-7.28 (m, 1H), 2.45 (s, 3H); <sup>13</sup>C NMR (100 MHz, CDCl<sub>3</sub>) δ 21.4, 108.4, 113.8, 116.5, 120.5, 121.2, 127.1, 128.8, 129.5, 129.8, 130.9, 131.9, 134.6, 140.4, 145.0, 145.2, 151.6, 152.7; HRMS: *m/z* calcd. for C<sub>23</sub>H<sub>17</sub>N<sub>3</sub> 335.1422 found

335.1420.

#### 4-(naphthalen-1-yl)-2-phenylpyrimido[1,2-*b*]indazole (4n)

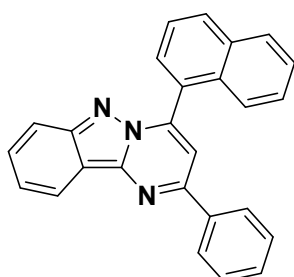

Brown solid; Isolated yield - 81 %; mp: 180-182 °C; <sup>1</sup>H NMR (400 MHz, CDCl<sub>3</sub>) δ 8.44-8.37 (m, 2H), 8.27-8.25 (m, 2H), 8.01-7.85 (m, 4H), 7.66-7.53 (m, 8H), 7.32 (t, *J* = 7.2 Hz, 1H); <sup>13</sup>C NMR (100 MHz, CDCl<sub>3</sub>) δ 113.1, 113.8, 116.6, 120.8, 121.2, 125.3, 126.2, 127.1, 128.2, 128.6, 128.8, 129.5, 129.9, 130.0, 130.9, 131.1, 131.5, 134.1, 136.4, 144.9, 151.6, 154.7; HRMS: *m/z* calcd. for C<sub>26</sub>H<sub>17</sub>N<sub>3</sub> 371.1422 found 371.1420.

#### 4-(2-nitrophenyl)-2-phenylpyrimido[1,2-*b*]indazole (4o)

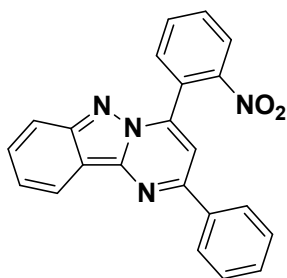

Brown solid; Isolated yield - 77 %; mp: 200-202 °C; <sup>1</sup>H NMR (400 MHz, CDCl<sub>3</sub>) δ 8.33 (d, *J* = 7.6 Hz, 1H), 8.22-8.19 (m, 2H), 8.04-8.01 (m, 1H), 7.89-7.85 (m, 2H), 7.76-7.75 (m, 1H), 7.66-7.61 (m, 5H), 7.41 (s, 1H), 7.33-7.32 (m, 1H); <sup>13</sup>C NMR (100 MHz, CDCl<sub>3</sub>) δ 110.6, 113.9, 116.7, 121.1, 121.3, 124.8, 128.9, 129.5, 130.1, 130.1, 131.2, 131.3, 131.5, 132.8, 133.6, 144.6, 145.3, 149.0, 150.4, 151.6 ; HRMS: *m/z*

calcd. for C<sub>22</sub>H<sub>14</sub>N<sub>4</sub>O<sub>2</sub> 366.1117 found 366.1115.

#### 4-(2-chlorophenyl)-2-phenylpyrimido[1,2-*b*]indazole (4p)

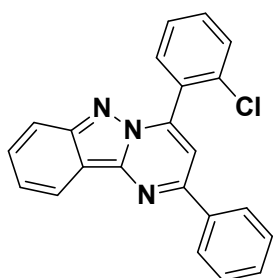

Yellow solid; Isolated yield - 70 %; mp: 198-200 °C; <sup>1</sup>H NMR (400 MHz, CDCl<sub>3</sub>) δ 8.41 (d, *J* = 8.4 Hz, 1H), 8.26-8.24 (m, 2H), 7.91-7.88 (m, 2H), 7.76 (s, 1H), 7.66-7.43 (m, 7H), 7.34-7.32 (m, 1H); <sup>13</sup>C NMR (100 MHz, CDCl<sub>3</sub>) δ 112.8, 113.9, 116.6, 120.9, 121.0, 127.4, 128.8, 129.5, 129.8, 130.4, 130.5, 131.1, 131.5, 131.8, 132.4, 137.5, 144.2, 144.9, 151.4, 152.2; HRMS: *m/z* calcd. for C<sub>22</sub>H<sub>14</sub>N<sub>3</sub>Cl 355.0876 found 355.0875.



#### (4-phenylpyrimido[1,2-*b*]indazol-2-yl)methanol (4q)

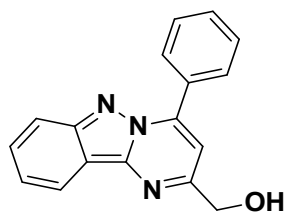

Brown solid; Isolated yield - 76 %; mp: 206-208 °C; <sup>1</sup>H NMR (400 MHz, CDCl<sub>3</sub>) δ 8.41 (d, *J* = 8.4 Hz, 1H), 8.24 (d, *J* = 8.0 Hz, 2H), 7.83 (d, *J* = 8.8 Hz, 1H), 7.73 (s, 1H), 7.65 (t, *J* = 7.6 Hz, 1H), 7.58-7.49 (m, 3H), 7.32 (t, *J* = 8.0 Hz, 1H), 5.33 (s, 2H), 4.28 (bs, 1H); <sup>13</sup>C NMR (100 MHz, CDCl<sub>3</sub>) δ 61.1, 106.0, 113.8, 116.0, 120.9, 121.3, 127.3, 129.1, 130.2, 130.3, 137.1, 144.9, 151.5, 153.2; HRMS: *m/z* calcd. for C<sub>17</sub>H<sub>13</sub>N<sub>3</sub>O 275.1059 found 275.1059.

#### 2-(4-bromophenyl)-4-phenylpyrimido[1,2-*b*]indazole (4s)

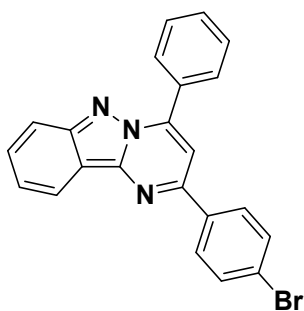

Yellow solid; Isolated yield - 76 %; mp: 168-170 °C; <sup>1</sup>H NMR (400 MHz, CDCl<sub>3</sub>) δ 8.43 (d, *J* = 8.0 Hz, 1H), 8.29-8.27 (m, 2H), 8.23-8.31 (m, 2H), 7.86 (d, *J* = 8.4 Hz, 1H), 7.74 (s, 1H), 7.65-7.51 (m, 6H), 7.31 (t, *J* = 7.6 Hz, 1H); <sup>13</sup>C NMR (100 MHz, CDCl<sub>3</sub>) δ 108.6, 113.9, 116.6, 120.7, 121.2, 127.2, 128.5, 129.0, 129.5, 129.8, 130.1, 131.0, 131.8, 137.3, 145.0, 145.3, 151.6, 152.6; HRMS: *m/z* calcd. for C<sub>22</sub>H<sub>14</sub>BrN<sub>3</sub> 399.0371 found 399.0370.

#### 4-(4-phenylpyrimido[1,2-*b*]indazol-2-yl)benzotrile (4t)

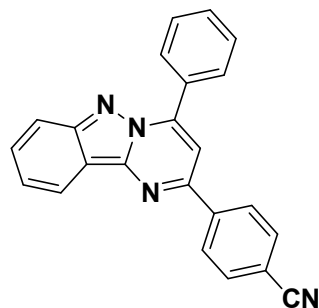

Yellow solid; Isolated yield - 76 %; mp: 232-234 °C; <sup>1</sup>H NMR (400 MHz, CDCl<sub>3</sub>) δ 8.46 (d, *J* = 8.4 Hz, 1H), 8.40 (d, *J* = 8.0 Hz, 2H), 8.30 (d, *J* = 8.0 Hz, 2H), 7.97 (d, *J* = 8.0 Hz, 2H), 7.87 (d, *J* = 8.8 Hz, 1H), 7.79 (s, 1H), 7.70-7.50 (m, 4H), 7.38 (t, *J* = 7.6 Hz, 1H); <sup>13</sup>C NMR (100 MHz, CDCl<sub>3</sub>) δ 108.8, 114.0, 114.5, 116.5, 118.1, 121.2, 127.1, 129.1, 130.2, 130.3, 130.4, 132.5, 136.0, 136.9, 142.9, 145.0, 151.6, 152.5; HRMS: *m/z* calcd. for C<sub>23</sub>H<sub>14</sub>N<sub>4</sub> 346.1218 found 346.1218.

#### 5,7-diphenyl-[1,2,4]triazolo[1,5-*a*]pyrimidine (4u)

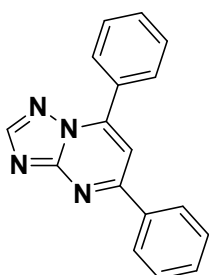

Off-White solid; Isolated yield - 65 %; mp: 160-161 °C; <sup>1</sup>H NMR (400 MHz, CDCl<sub>3</sub>) δ 8.54 (s, 1H), 8.27 (s, 2H), 8.14 (d, *J* = 5.2 Hz, 2H), 7.67-7.56 (m, 7H); <sup>13</sup>C NMR (100 MHz, CDCl<sub>3</sub>) δ 106.6, 127.8, 128.3, 128.5, 129.0, 129.1, 129.3, 130.2, 131.3, 131.8, 133.1, 136.4, 148.1, 156.3, 161.7; HRMS: *m/z* calcd. for C<sub>17</sub>H<sub>12</sub>N<sub>4</sub> 272.1062 found 272.1060.

### 5,7-diphenylpyrazolo[1,5-a]pyrimidine (4v)

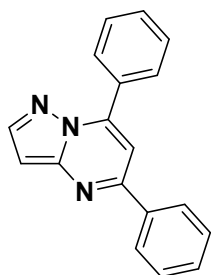

Brown solid; Isolated yield - 60 %; mp: 84-85 °C; <sup>1</sup>H NMR (400 MHz, CDCl<sub>3</sub>) δ 8.17-8.06 (m, 5H), 7.58-7.46 (m, 6H), 7.35 (s, 1H), 6.80 (s, 1H); <sup>13</sup>C NMR (100 MHz, CDCl<sub>3</sub>) δ 97.2, 105.2, 127.3, 128.3, 128.5, 128.7, 128.9, 129.7, 130.3, 130.9, 131.5, 137.5, 145.2, 146.8, 149.9, 156.2; HRMS: m/z calcd. for C<sub>18</sub>H<sub>13</sub>N<sub>3</sub> 271.1109 found 272.1109.

### 2,4-diphenylbenzo[4,5]imidazo[1,2-a]pyrimidine (4w)

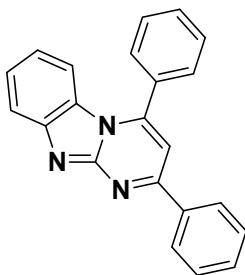

Off-White solid; Isolated yield - 35 %; mp: 276-277 °C; <sup>1</sup>H NMR (400 MHz, CDCl<sub>3</sub>) δ 8.25-8.23 (m, 2H), 7.90 (d, *J* = 8.0 Hz, 1H), 7.64-7.60 (m, 4H), 7.59-7.46 (m, 4H), 7.38-7.37 (m, 2H), 7.20-7.19 (m, 1H), 6.96-6.60 (m, 1H); <sup>13</sup>C NMR (100 MHz, CDCl<sub>3</sub>) δ 104.2, 113.4, 119.2, 120.1, 124.9, 126.8, 127.3, 127.9, 128.4, 130.0, 130.2, 131.5, 135.6, 144.5, 148.3, 160.1 ; HRMS: m/z calcd. for C<sub>22</sub>H<sub>15</sub>N<sub>3</sub> 321.1266 found 321.1265.

### Copies of <sup>1</sup>H NMR, <sup>13</sup>C NMR and HRMS of 4(a-t):

#### <sup>1</sup>H NMR spectrum of compound (4a):

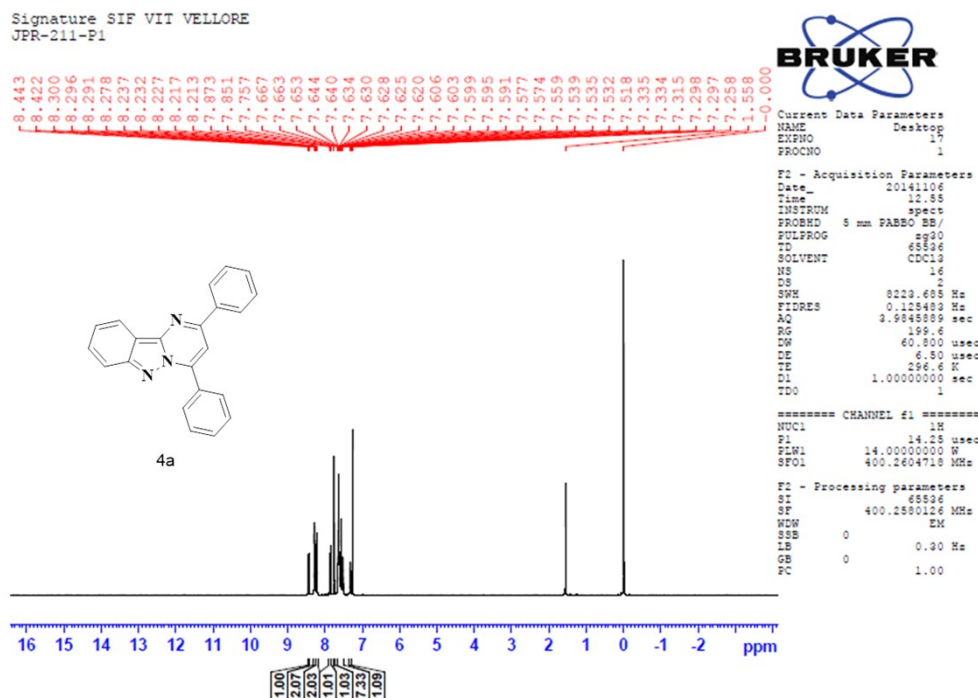

## Expanded $^1\text{H}$ NMR spectrum of compound (4a):

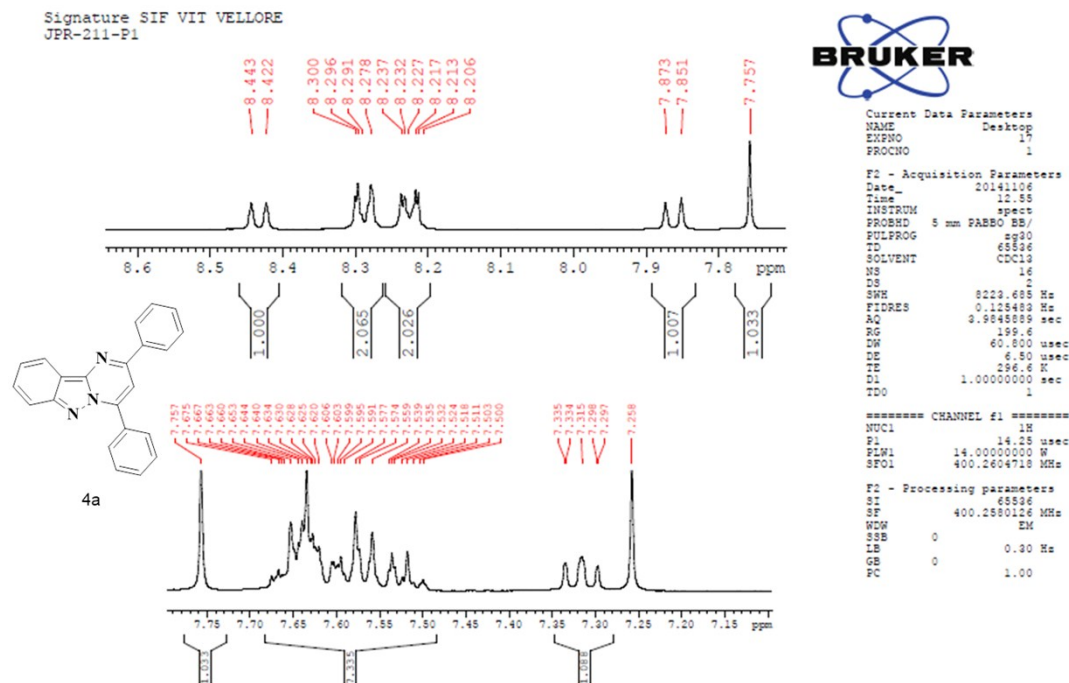

## $^{13}\text{C}$ NMR spectrum of compound (4a):

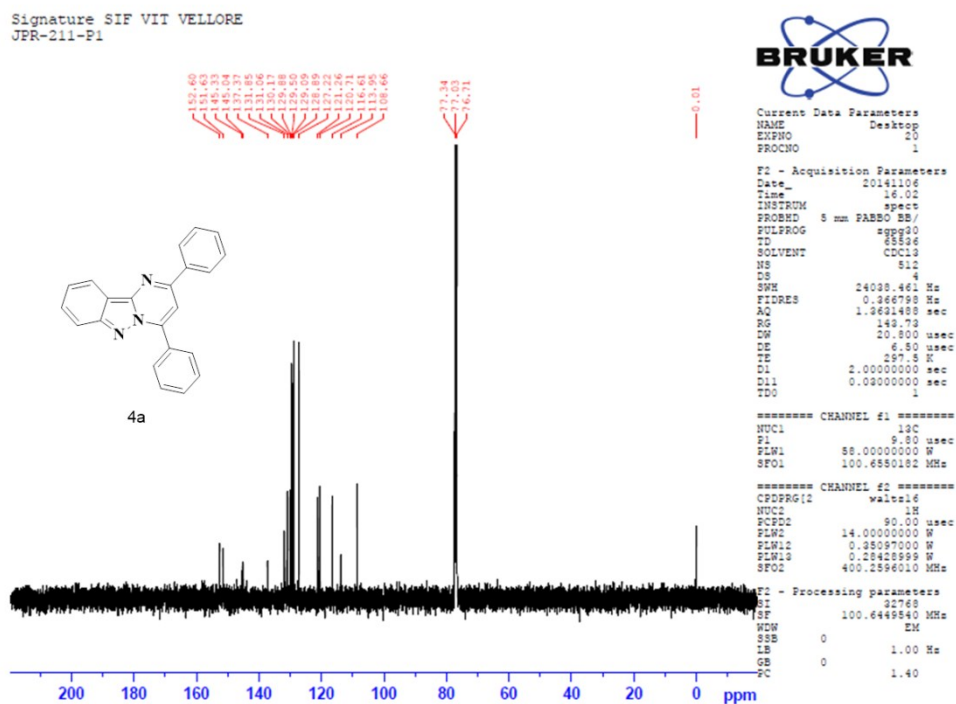

## DEPT – 135 spectrum of compound (4a):

Signature SIF VIT VELLORE  
JPR-211-P1

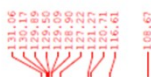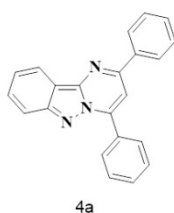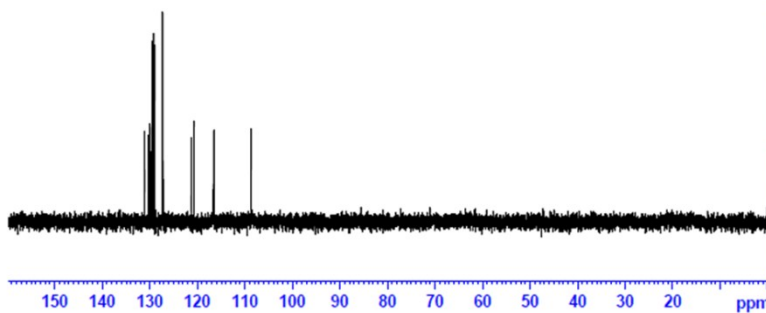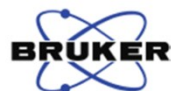

Current Data Parameters  
NAME Desktop  
EXPNO 1  
PROCNO 1

F2 - Acquisition Parameters  
Date\_ 20141106  
Time 18:26  
INSTRUM spect  
PROBHD 5 mm PABBO BB/  
PULPROG dept135  
TD 65536  
SOLVENT CDCl3  
NS 256  
DS 4  
SWH 16129.032 Hz  
FIDRES 0.244110 Hz  
AQ 2.0316160 sec  
RG 199.6  
DW 31.000 usec  
DE 6.50 usec  
TE 297.0 K  
CST2 145.000000  
D1 2.0000000 sec  
D2 0.00344828 sec  
D12 0.0000000 sec  
TDO 1

----- CHANNEL f1 -----  
NUC1 13C  
P1 9.80 usec  
P13 2000.00 usec  
PLM0 0 W  
PLM1 58.0000000 W  
SFO1 100.6530053 MHz  
SFO1[5] Crp60comp.4  
SFO13 0.500  
SFOFF5 0 Hz  
SFO5 8.51080036 W

----- CHANNEL f2 -----  
CPDPRG2 waltz16  
NUC2 1H  
P3 14.25 usec  
P4 28.50 usec  
PCPD2 80.00 usec  
PLM2 14.0000000 W  
PLM2 0.35097000 W  
SFO2 400.2592801 MHz

F2 - Processing parameters  
SI 32768  
SF 100.6449540 MHz  
WDW EM  
SSB 0  
LB 1.00 Hz  
GB 0  
PC 1.40

## HRMS spectrum of compound (4a):

JPR-211P

Scan 3 TIC=4062016 Base=20%FS #Ions=1129 RT=.07

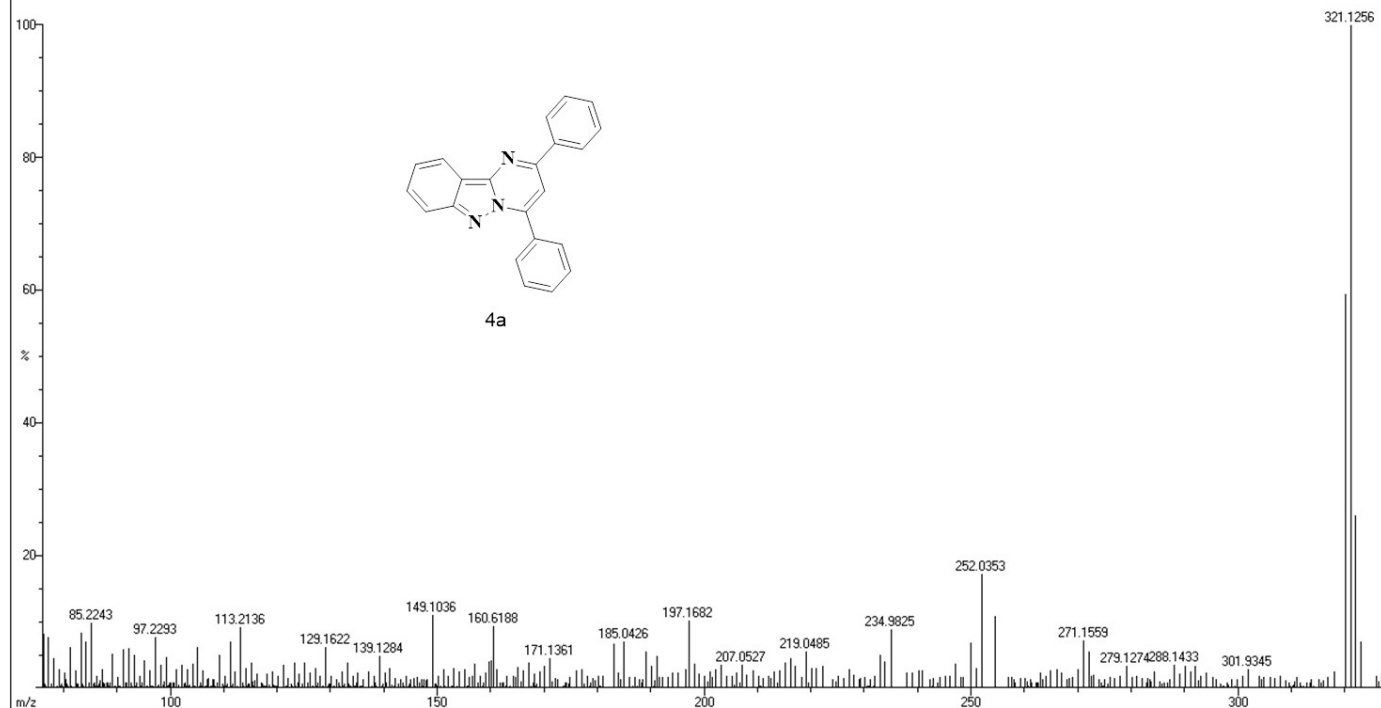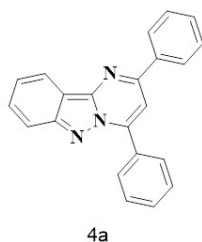

# <sup>1</sup>H NMR spectrum of compound (4b):

Signature SIF VIT VELLORE  
JPR-235-P

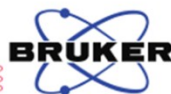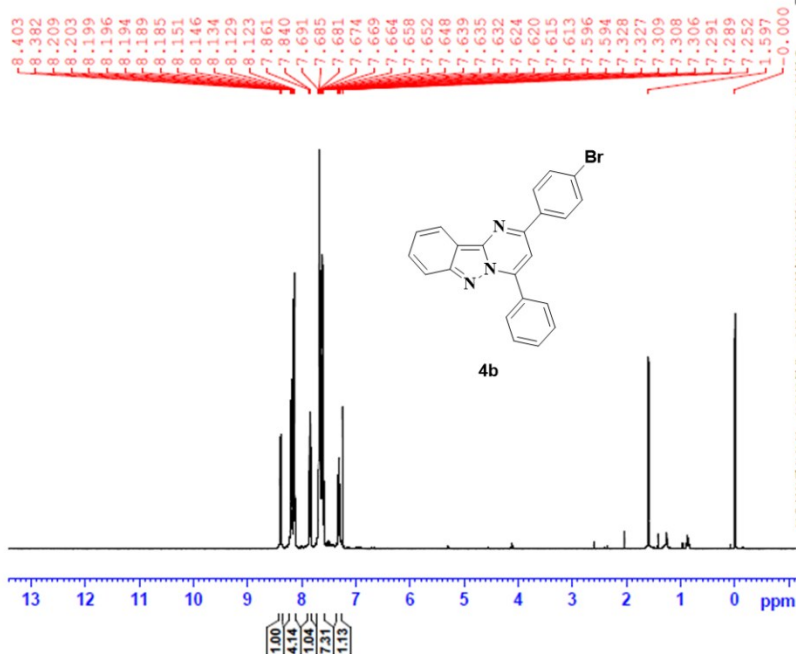

```
Current Data Parameters
NAME      Desktop
EXPNO    7
PROCNO   1

F2 - Acquisition Parameters
Date_    20180106
Time     13.46
INSTRUM  spect
PROBHD   5 mm PABBO BB/
PULPROG  zg30
TD       65536
SOLVENT  CDCl3
NS       16
DS       2
SWH      8223.685 Hz
FIDRES   0.125483 Hz
AQ       3.9845839 sec
RG       142.73
DW       60.800 usec
DE       6.50 usec
TE       297.1 K
D1       1.00000000 sec
TD0      1

===== CHANNEL f1 =====
NUC1     1H
P1       14.25 usec
PLM1     14.00000000 W
SFO1     400.2604718 MHz

F2 - Processing parameters
SI       65536
SF       400.260146 MHz
WDW      EM
SSB      0
LB       0.30 Hz
GB       0
FC       1.00
```

# Expanded <sup>1</sup>H NMR spectrum of compound (4b):

Signature SIF VIT VELLORE  
JPR-235-P

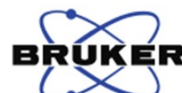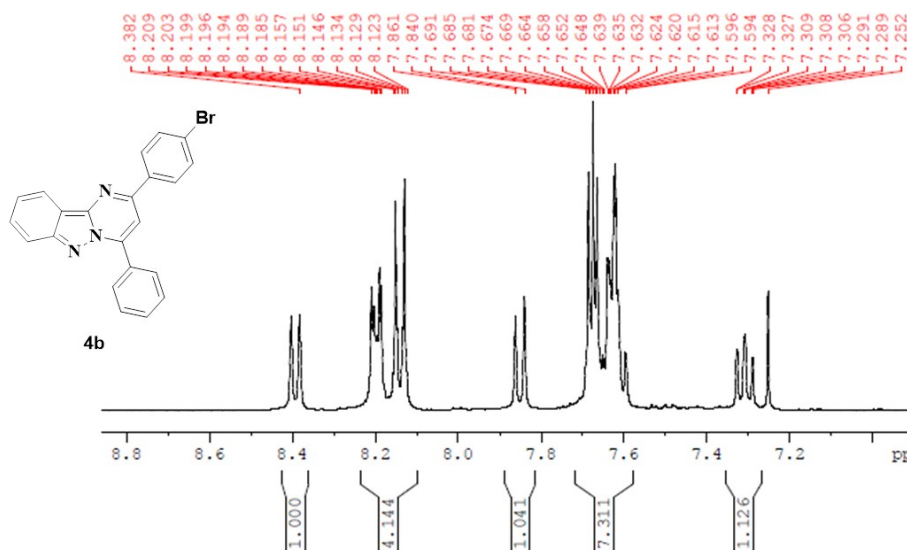

```
Current Data Parameters
NAME      Desktop
EXPNO    7
PROCNO   1

F2 - Acquisition Parameters
Date_    20180106
Time     13.46
INSTRUM  spect
PROBHD   5 mm PABBO BB/
PULPROG  zg30
TD       65536
SOLVENT  CDCl3
NS       16
DS       2
SWH      8223.685 Hz
FIDRES   0.125483 Hz
AQ       3.9845839 sec
RG       142.73
DW       60.800 usec
DE       6.50 usec
TE       297.1 K
D1       1.00000000 sec
TD0      1

===== CHANNEL f1 =====
NUC1     1H
P1       14.25 usec
PLM1     14.00000000 W
SFO1     400.2604718 MHz

F2 - Processing parameters
SI       65536
SF       400.260146 MHz
WDW      EM
SSB      0
LB       0.30 Hz
GB       0
FC       1.00
```

# <sup>13</sup>C NMR spectrum of compound (4b):

Signature SIF VIT VELLORE  
JPR-235-P

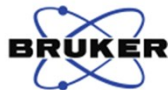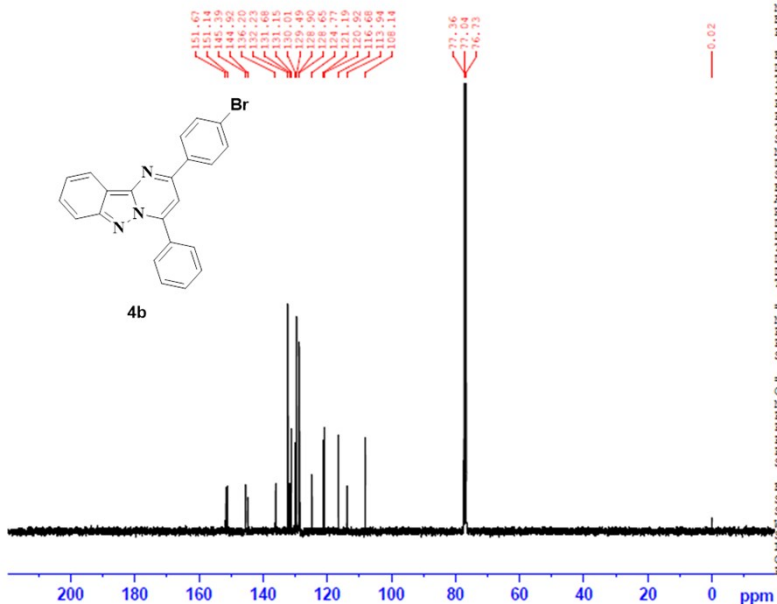

```
Current Data Parameters
NAME      Desktop
EXPNO     8
PROCNO    1

F2 - Acquisition Parameters
Date_     20180106
Time      14.16
INSTRUM   spect
PROBHD    5 mm PABBO BB/
PULPROG   zgpg30
TD         65536
SOLVENT   CDCl3
NS         512
DS         4
SWH       24038.461 Hz
FIDRES    0.366798 Hz
AQ         1.3621488 sec
RG         149.73
DM         20.800 usec
DE         6.80 usec
TE         297.6 K
D1         2.0000000 sec
D11        0.0300000 sec
TD0        1

===== CHANNEL f1 =====
NUC1       13C
P1         9.80 usec
PLW1       58.0000000 W
SFO1       100.62850182 MHz

===== CHANNEL f2 =====
CPDPRG2   waltz16
NUC2       1H
PCPD2     90.00 usec
PLW2      14.00000000 W
PLW12     0.28037000 W
PLW13     0.28428999 W
SFO2      400.2596010 MHz

F2 - Processing parameters
SI         32768
SF         100.6449840 MHz
WDW        EM
SSB        0
LB         1.00 Hz
GB         0
PC         1.40
```

# HRMS spectrum of compound (4b):

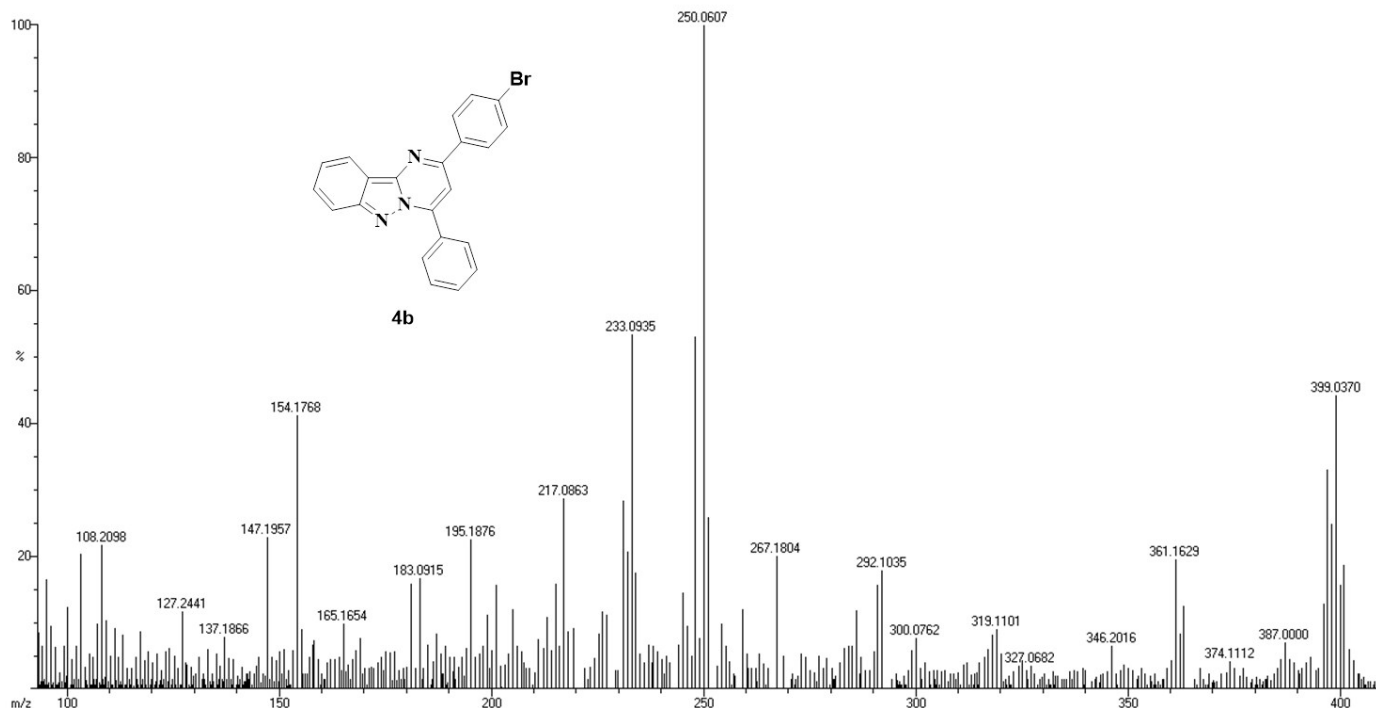

**<sup>1</sup>H NMR spectrum of compound (4c):**

Signature SIF VIT VELLORE  
JPR-321-P

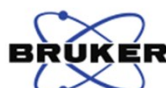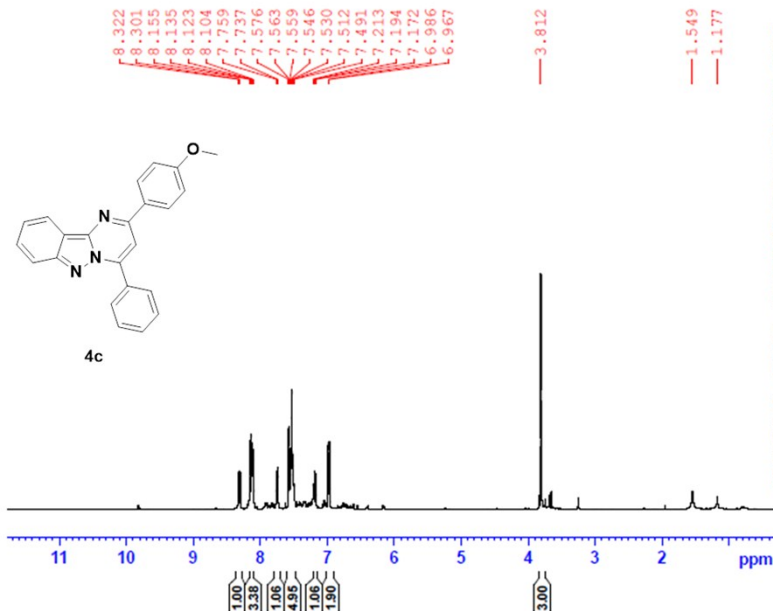

```

Current Data Parameters
NAME      M00
EXPNO    54
PROCNO   1

F2 - Acquisition Parameters
Date_    20180829
Time     17.04
INSTRUM  spect
PROBHD   5 mm PABBO BB/
PULPROG  zg30
TD       65536
SOLVENT  CDCl3
NS       16
DS       2
SWH      8222.688 Hz
FIDRES   0.125489 Hz
AQ       3.9846889 sec
RG       127.79
DW       60.800 usec
DE       6.50 usec
TE       302.2 K
D1       1.00000000 sec
TD0      1

===== CHANNEL f1 =====
NUC1     1H
P1       14.25 usec
PL1      14.00000000 W
SFO1     400.2604718 MHz

F1 - Processing parameters
SI       65536
SF       400.2500483 MHz
WDW      EM
SSB      0
LB       0.20 Hz
GB       0
PC       1.00
    
```

**Expanded <sup>1</sup>H NMR spectrum of compound (4c):**

Signature SIF VIT VELLORE  
JPR-321-P

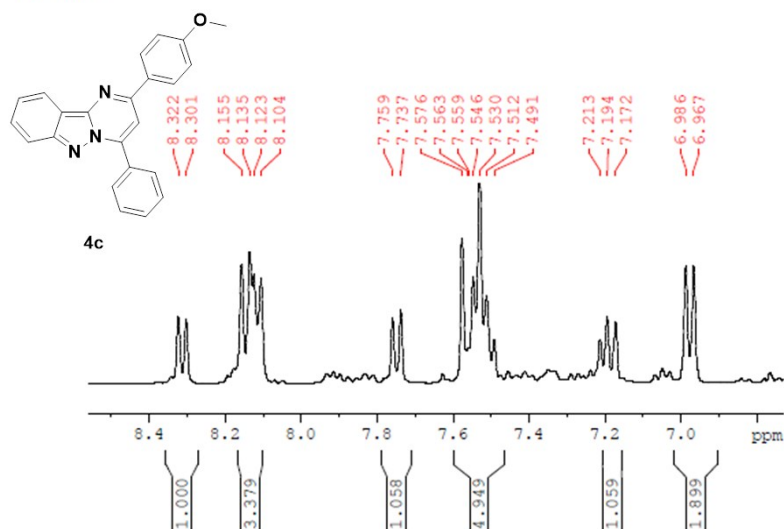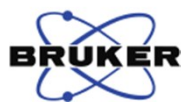

Current Data Parameters  
NAME M00  
EXPNO 54  
PROCNO 1

F2 - Acquisition Parameters  
Date\_ 20180829  
Time 17.04  
INSTRUM spect  
PROBHD 5 mm FAREO BB/  
PULPROG zg30  
TD 65536  
SOLVENT CDCl3  
NS 16  
DS 2  
SWH 8223.685 Hz  
FIDRES 0.125488 Hz  
AQ 3.9845889 sec  
RG 127.75  
SN 60.800  
DE 6.50 usec  
TE 302.7 K  
D1 1.00000000 sec  
TD0 1

===== CHANNEL f1 =====  
NUC1 1H  
P1 14.25 usec  
PL1 14.00000000 W  
SFO1 400.2604718 MHz

F2 - Processing parameters  
SI 65536  
SF 400.250483 MHz  
WDW EM  
SSB 0  
LB 0.30 Hz  
GB 0  
PC 1.00

### <sup>13</sup>C NMR spectrum of compound (4c):

Signature SIF VIT VELLORE  
JPR-321-P

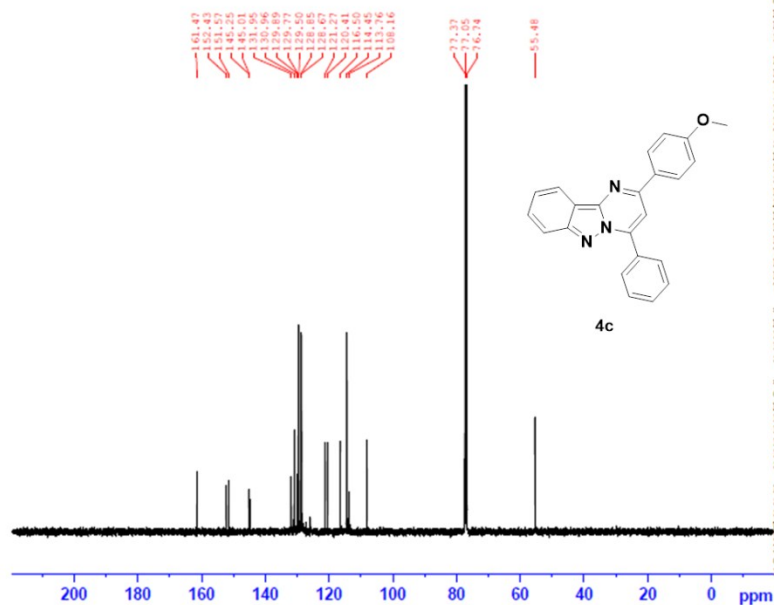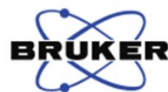

Current Data Parameters  
NAME M0040515  
EXPNO 87  
PROCNO 1

F2 - Acquisition Parameters  
Date\_ 20180830  
Time 2.41  
INSTRUM spect  
PROBHD 5 mm FAREO BB/  
PULPROG zgpg30  
TD 65536  
SOLVENT CDCl3  
NS 4  
DS 4  
SWH 24038.461 Hz  
FIDRES 0.366798 Hz  
AQ 1.9631488 sec  
RG 159.6  
SN 20.800  
DE 6.50 usec  
TE 299.8 K  
D1 2.00000000 sec  
D11 0.02000000 sec  
TD0 1

===== CHANNEL f1 =====  
NUC1 13C  
P1 9.80 usec  
PL1 88.00000000 W  
SFO1 100.6250182 MHz

===== CHANNEL f2 =====  
CPDPRG12 waltz16  
NUC2 1H  
PCPD2 90.00 usec  
PLW2 14.00000000 W  
PLW12 0.28097000 W  
PLW13 0.28428999 W  
SFO2 400.2596010 MHz

F2 - Processing parameters  
SI 20768  
SF 100.6449540 MHz  
WDW EM  
SSB 0  
LB 1.00 Hz  
GB 0  
PC 1.40

### HRMS spectrum of compound (4c):



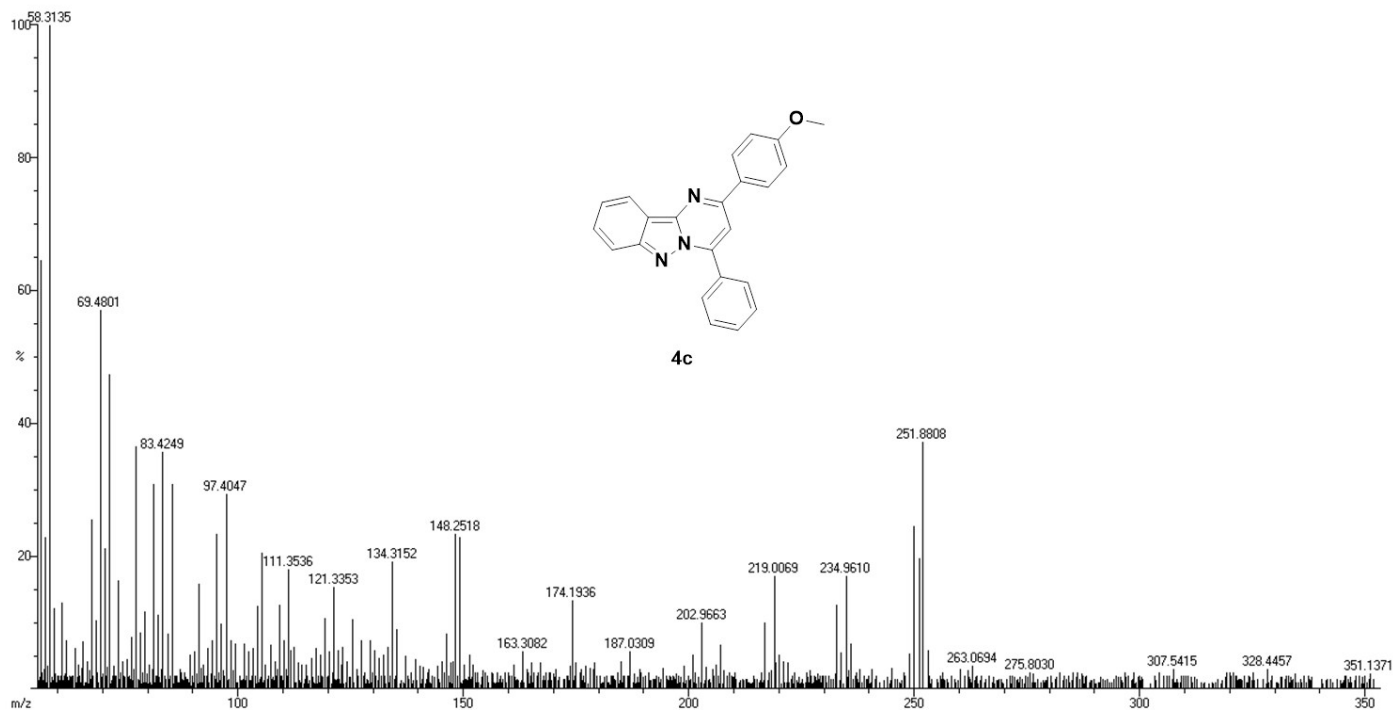

### $^1\text{H}$ NMR spectrum of compound (4d):

Signature SIF VIT VELLORE  
JPR-312-P

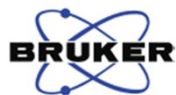

8.405  
8.230  
8.224  
8.214  
8.210  
8.206  
7.867  
7.845  
7.838  
7.835  
7.828  
7.826  
7.699  
7.690  
7.685  
7.676  
7.659  
7.647  
7.625  
7.611  
7.608  
7.577  
7.575  
7.565  
7.562  
7.337  
7.318  
7.289  
7.282  
7.232  
7.223  
7.220  
7.210  
1.611

Current Data Parameters  
NAME Desktop  
EXNO 5  
PROCNO 1

F2 - Acquisition Parameters  
Date\_ 20180809  
Time 13.17  
INSTRUM spect  
PROBHD 5 mm PABBO BB/  
PULPROG zg30  
TD 65536  
SOLVENT CDCl3  
NS 16  
DS 2  
SWH 8123.688 Hz  
FIDRES 0.125483 Hz  
AQ 2.9845889 sec  
RG 199.6  
MW 60.900 usec  
DE 6.50 usec  
TE 299.6 K  
D1 1.00000000 sec  
TDO 1

==== CHANNEL f1 =====  
NUC1 1H  
P1 14.25 usec  
PLW1 14.00000000 W  
SF01 400.2604718 MHz

F2 - Processing parameters  
SI 65536  
SF 400.2580000 MHz  
WDW EM  
SSB 0  
LB 0.30 Hz  
GB 0  
PC 1.00

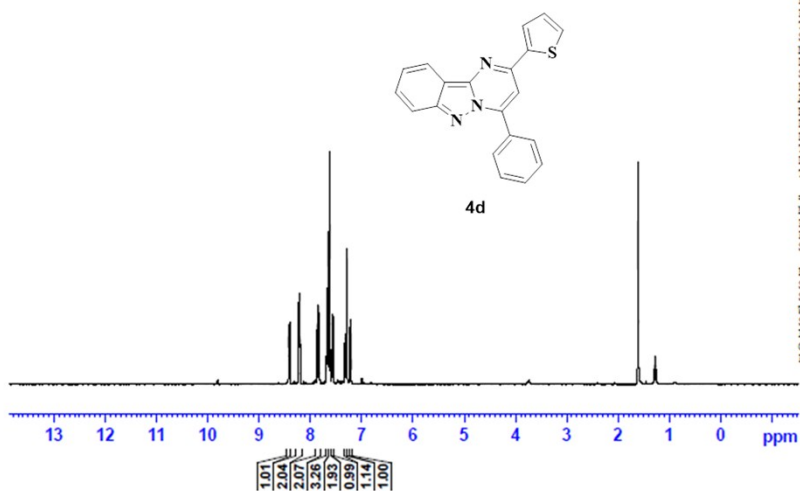

### Expanded $^1\text{H}$ NMR spectrum of compound (4d):

Signature SIF VIT VELLORE  
JPR-312-P

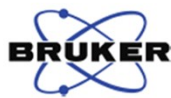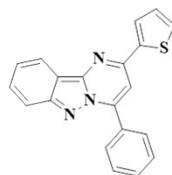

4d

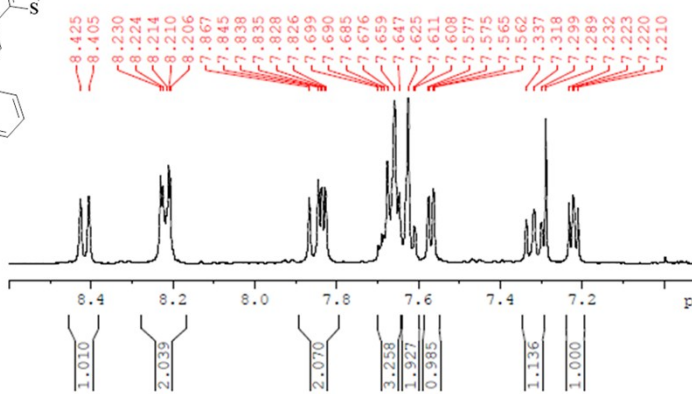

Current Data Parameters  
NAME Desktop  
EXPNO 3  
PROCNO 1

F2 - Acquisition Parameters  
Date\_ 20180809  
Time 13.17  
INSTRUM spect  
PROBHD 5 mm F4BBO BB/  
PULPROG zgpg30  
TD 65536  
SOLVENT CDCl3  
NS 2  
DS 2  
SWH 8223.688 Hz  
FIDRES 0.128483 Hz  
AQ 3.9848889 sec  
RG 199.6  
DM 60.800 usec  
DE 6.50 usec  
TE 299.6 K  
D1 1.0000000 sec  
TDO 1

===== CHANNEL f1 =====  
NUC1 1H  
P1 14.25 usec  
PLW1 14.00000000 W  
SFO1 400.2604718 MHz

F2 - Processing parameters  
SI 65536  
SF 400.2600000 MHz  
WDW EM  
SSB 0  
LB 0.30 Hz  
GB 0  
FC 1.00

**<sup>13</sup>C NMR spectrum of compound (4d):**

Signature SIF VIT VELLORE  
JPR-312-P

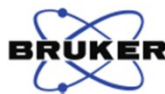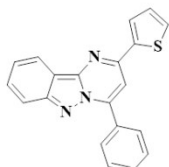

4d

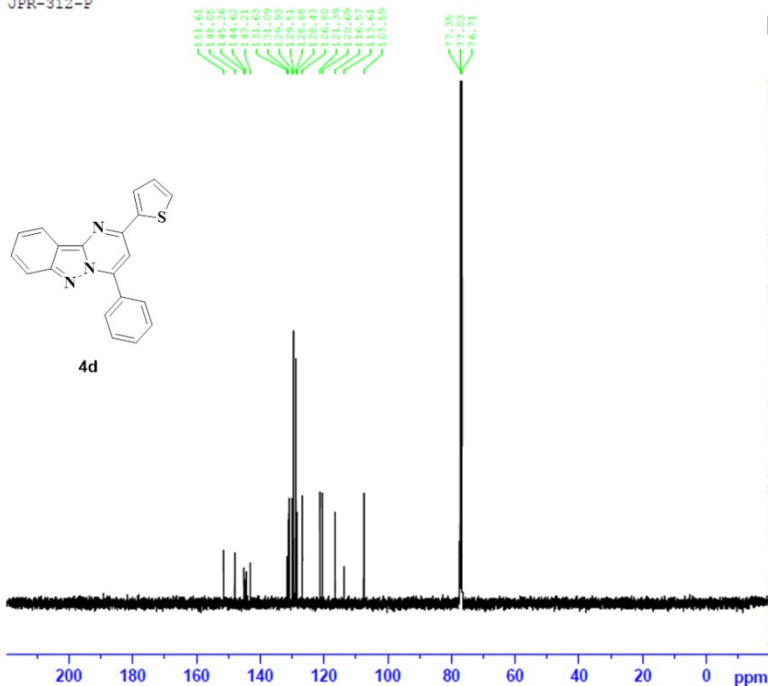

Current Data Parameters  
NAME Desktop  
EXPNO 14  
PROCNO 1

F2 - Acquisition Parameters  
Date\_ 20180809  
Time 23.18  
INSTRUM spect  
PROBHD 5 mm F4BBO BB/  
PULPROG zgpg30  
TD 65536  
SOLVENT CDCl3  
NS 1024  
DS 4  
SWH 24038.461 Hz  
FIDRES 0.366798 Hz  
AQ 1.3621488 sec  
RG 199.6  
DM 20.800 usec  
DE 6.50 usec  
TE 301.3 K  
D1 2.0000000 sec  
D11 0.0200000 sec  
TDO 1

===== CHANNEL f1 =====  
NUC1 13C  
P1 9.80 usec  
PLW1 88.00000000 W  
SFO1 100.6260182 MHz

===== CHANNEL f2 =====  
CPDPRG12 waltz16  
NUC2 1H  
PCPD2 90.00 usec  
PLW2 14.00000000 W  
FLW2 0.35097000 W  
PLW3 0.35428999 W  
SFO2 400.2596010 MHz

F2 - Processing parameters  
SI 65536  
SF 100.6260182 MHz  
WDW EM  
SSB 0  
LB 1.00 Hz  
GB 0  
FC 1.40

**HRMS spectrum of compound (4d):**

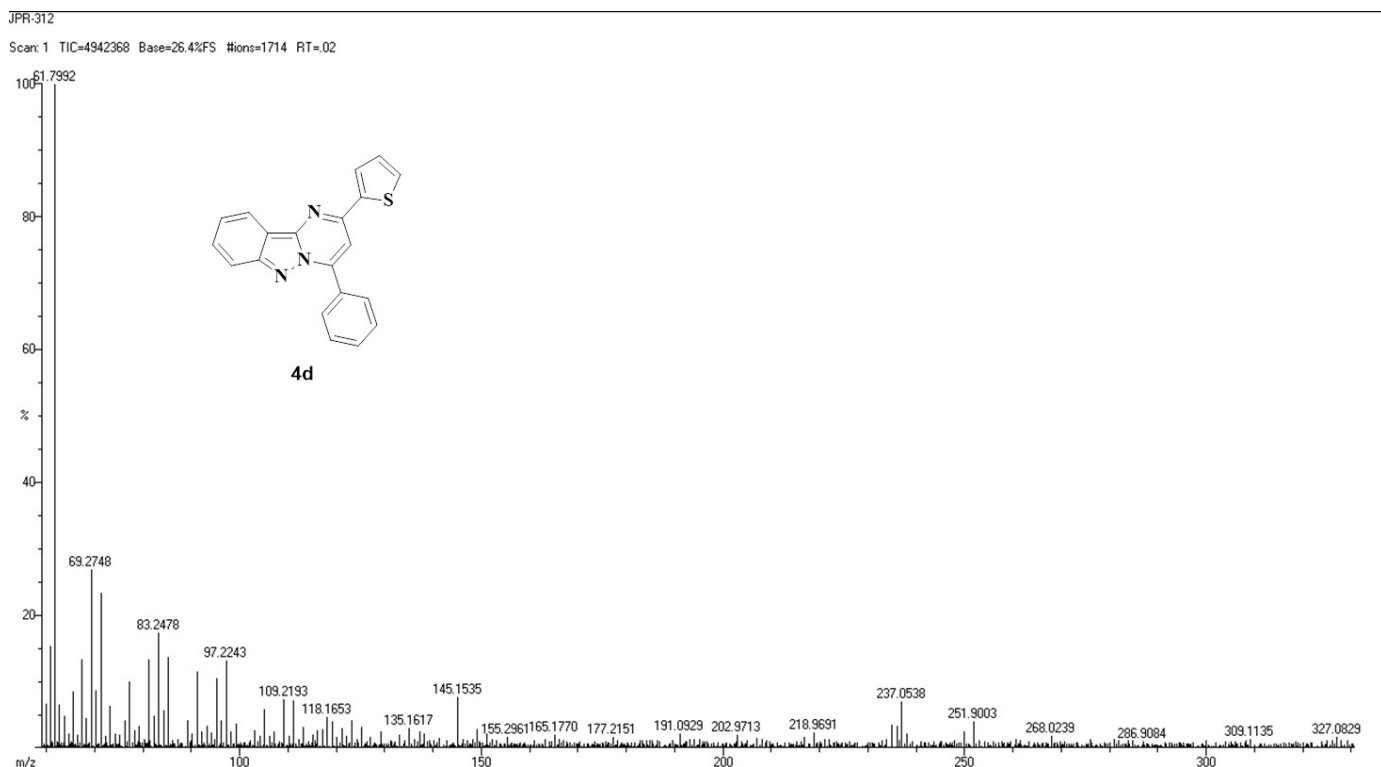

### <sup>1</sup>H NMR spectrum of compound (4e):

Signature SIF VIT VELLORE  
JPR-249-P

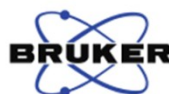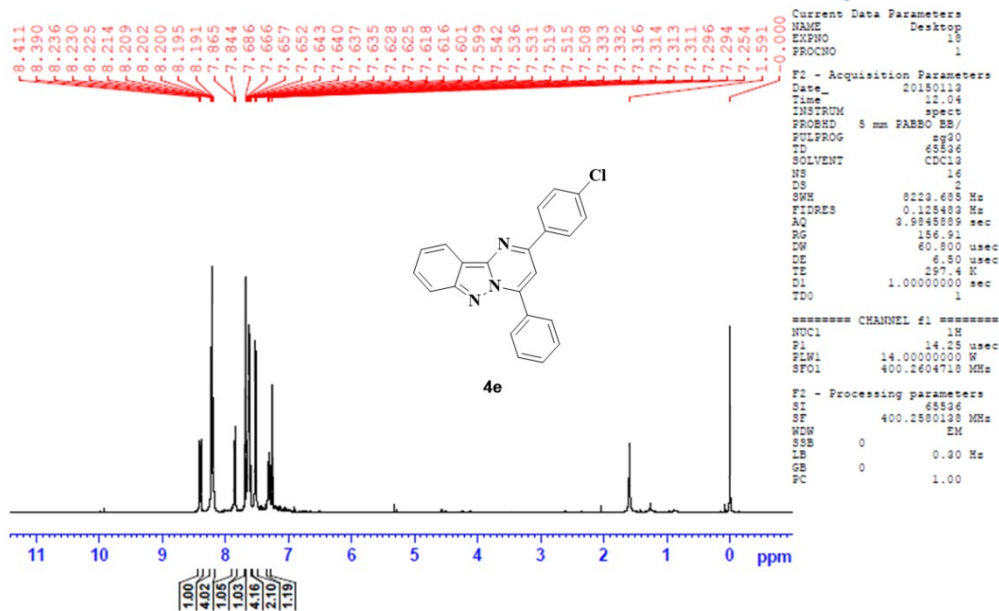

### Expanded <sup>1</sup>H NMR spectrum of compound (4e):

Signature SIF VIT VELLORE  
JPR-249-P

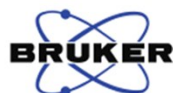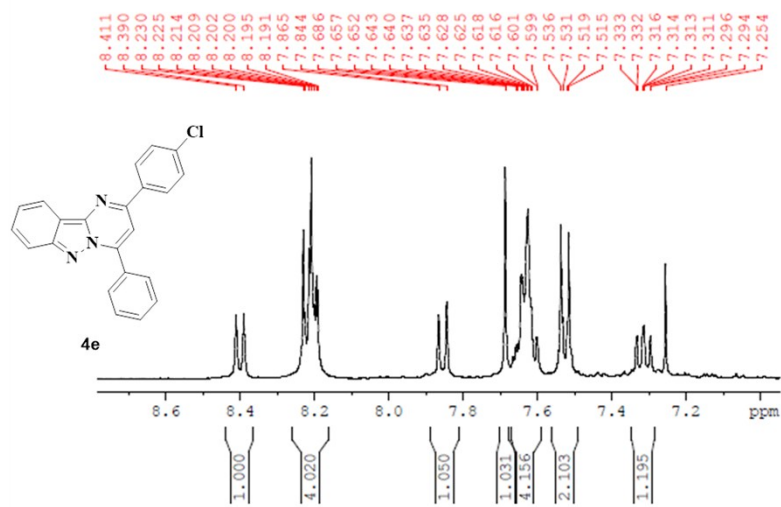

```
Current Data Parameters
NAME      Desktop
EXPNO    18
PROCNO   1

F2 - Acquisition Parameters
Date_    20180113
Time     12.04
INSTRUM spect
PROBHD   5 mm PABBO BB/
PULPROG zg30
TD       65536
SOLVENT  CDCl3
NS       16
DS       4
SWH      8229.685 Hz
FIDRES   0.1254882 Hz
AQ       3.984803 sec
RG       156.91
DM       60.800 usec
DE       6.50 usec
TE       297.4 K
D1       1.00000000 sec
TDO      1

===== CHANNEL f1 =====
NUC1     1H
P1       14.25 usec
PLW1     14.00000000 W
SFO1     400.2604718 MHz

F2 - Processing parameters
SI       65536
SF       400.260138 MHz
WDW      EM
SSB      0
LB       0.30 Hz
GB       0
FC       1.00
```

### <sup>13</sup>C NMR spectrum of compound (4e):

Signature SIF VIT VELLORE  
JPR-249-P

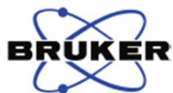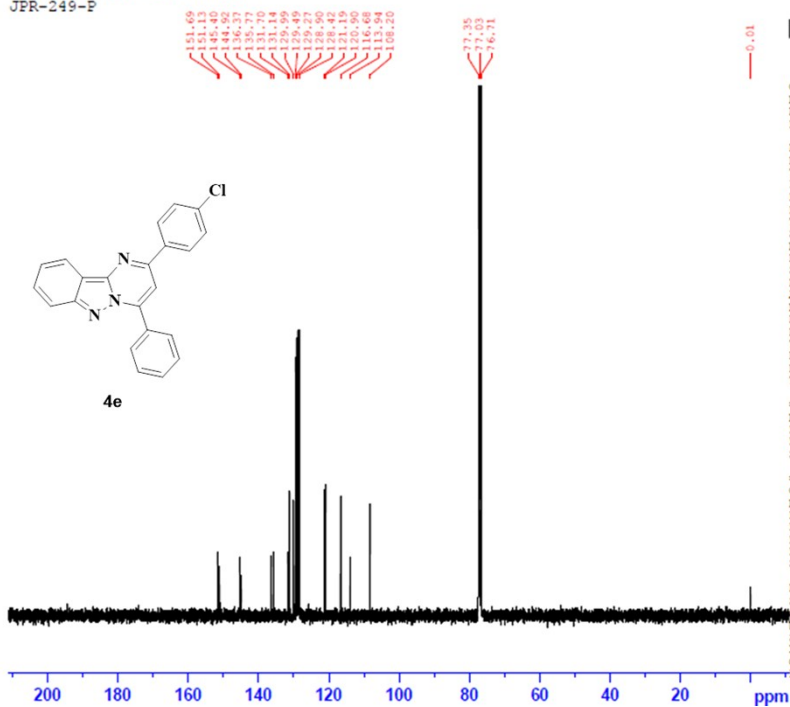

```
Current Data Parameters
NAME      Desktop
EXPNO    23
PROCNO   1

F2 - Acquisition Parameters
Date_    20180113
Time     19.42
INSTRUM spect
PROBHD   5 mm PABBO BB/
PULPROG zgpg30
TD       65536
SOLVENT  CDCl3
NS       512
DS       4
SWH      24028.441 Hz
FIDRES   0.366798 Hz
AQ       1.9621488 sec
RG       156.91
DM       20.300 usec
DE       6.50 usec
TE       300.1 K
D1       2.00000000 sec
D11      0.02000000 sec
TDO      1

===== CHANNEL f1 =====
NUC1     13C
P1       9.80 usec
PLW1     58.00000000 W
SFO1     100.6250182 MHz

===== CHANNEL f2 =====
CPDPRG12 waltz16
NUC2     1H
PCPD2    90.00 usec
PLW2     14.00000000 W
PLW12    0.28097000 W
PLW13    0.28428999 W
SFO2     400.2596010 MHz

F2 - Processing parameters
SI       32768
SF       100.6449940 MHz
WDW      EM
SSB      0
LB       1.00 Hz
GB       0
FC       1.40
```

### HRMS spectrum of compound (4e):

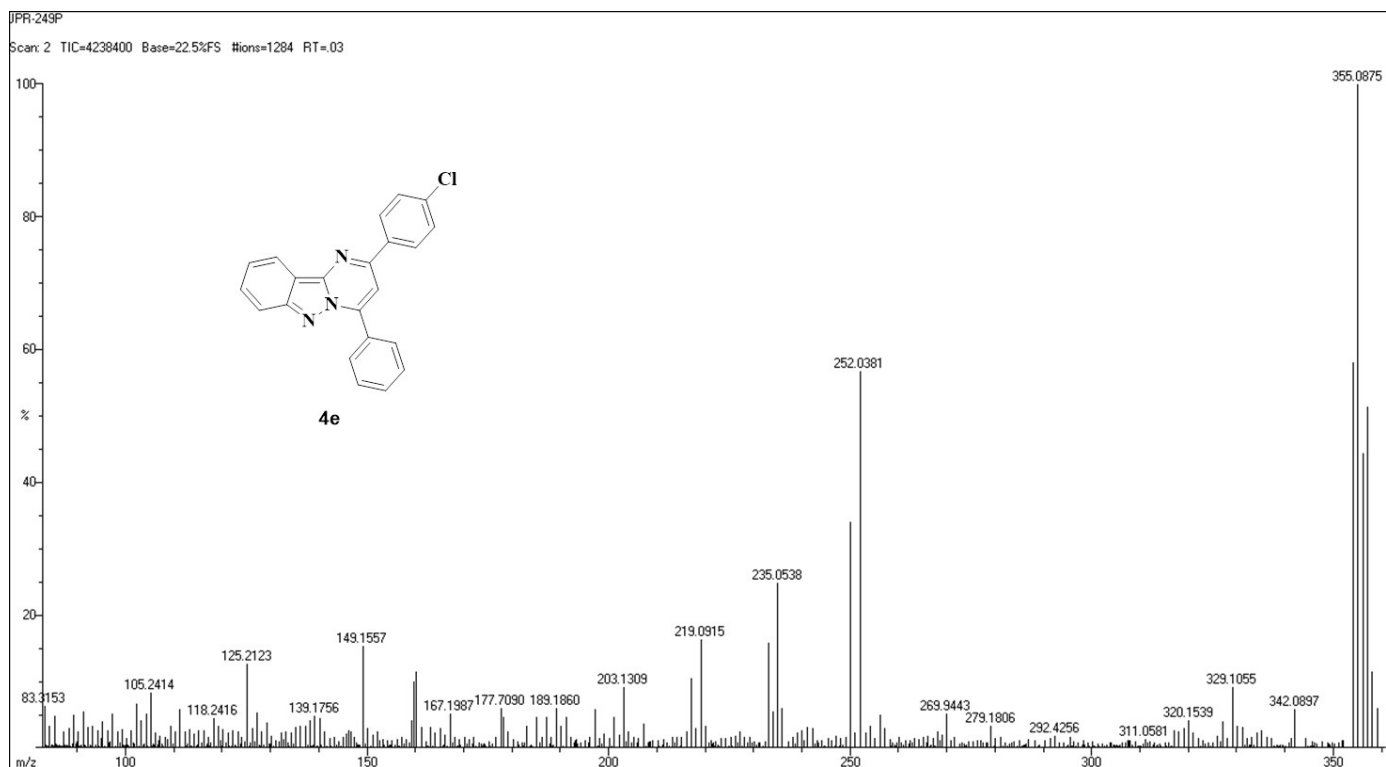

### <sup>1</sup>H NMR spectrum of compound (4f):

Signature SIF VIT VELLORE  
JPR-314-P

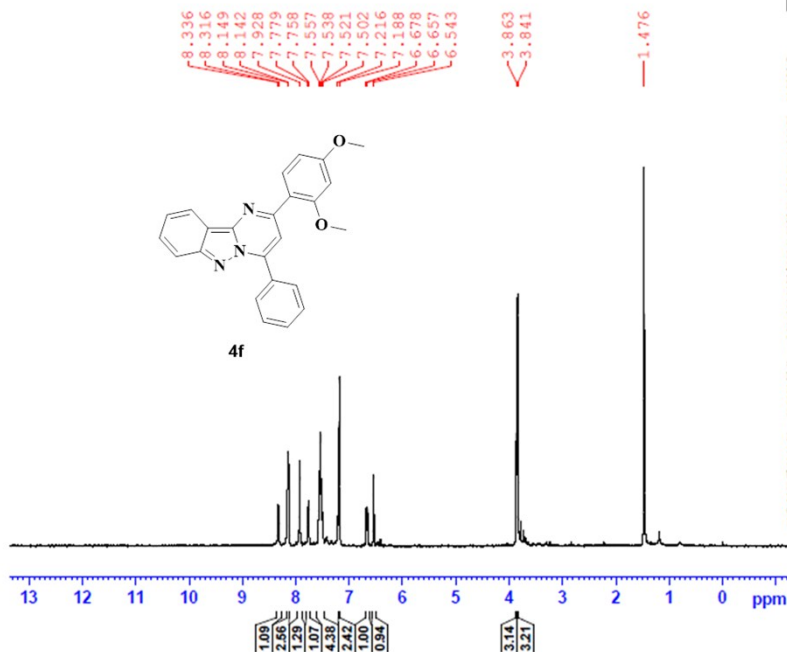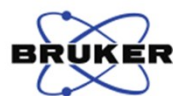

Current Data Parameters  
NAME Desktop  
EXNO 20  
PROCNO 1

F2 - Acquisition Parameters  
Date\_ 20180813  
Time\_ 17.23  
INSTRUM spect  
PROBHD 5 mm PABBO BB/  
PULPROG zg30  
TD 65536  
SOLVENT CDCl3  
NS 16  
DS 2  
SWH 8223.685 Hz  
FIDRES 0.125483 Hz  
AQ 3.984889 sec  
RG 199.6  
CW 60.800 usec  
DE 6.50 usec  
TE 304.9 K  
CI 1.0000000 sec  
TDO 1

===== CHANNEL f1 =====  
NUC1 1H  
P1 14.25 usec  
PLW1 14.0000000 W  
SFO1 400.2604718 MHz

F2 - Processing parameters  
SI 65536  
SF 400.2580419 MHz  
WDW EM  
SSB 0  
LB 0.30 Hz  
GB 0  
PC 1.00

### Expanded <sup>1</sup>H NMR spectrum of compound (4f):

Signature SIF VIT VELLORE  
JPR-314-P

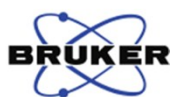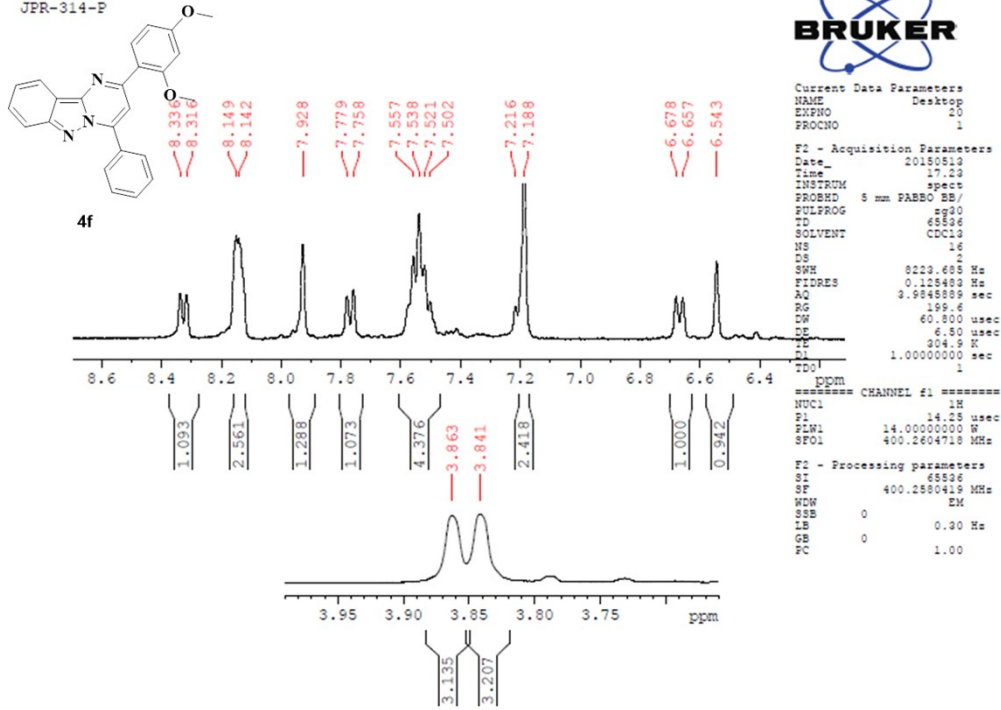

**<sup>13</sup>C NMR spectrum of compound (4f):**

Signature SIF VIT VELLORE  
JPR-314-P

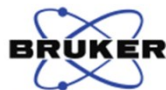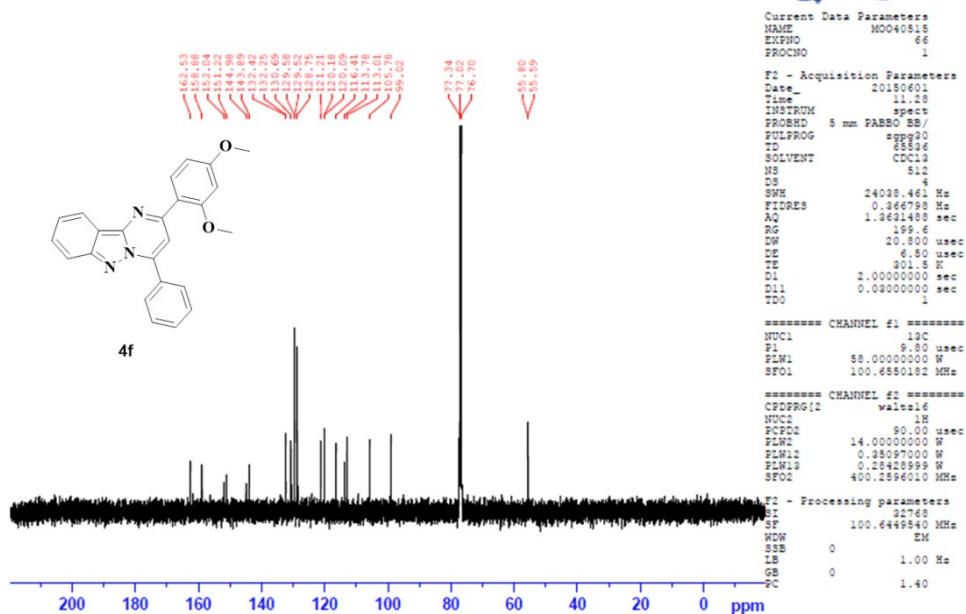

**HRMS spectrum of compound (4f):**

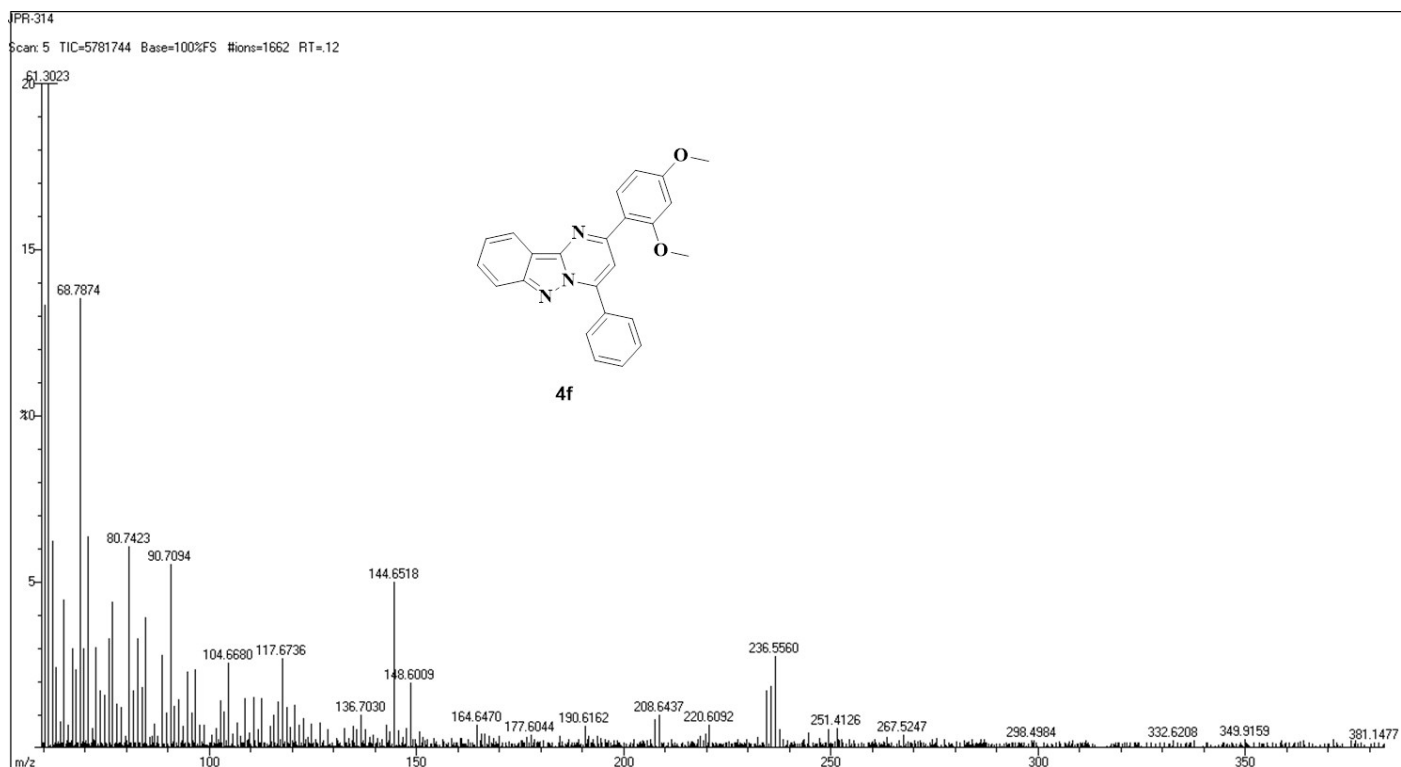

### <sup>1</sup>H NMR spectrum of compound (4g):

Signature SIF VIT VELLORE  
JPR-236-IOP

8.200  
8.194  
8.190  
8.184  
8.180  
8.176  
8.169  
7.836  
7.814  
7.810  
7.807  
7.801  
7.798  
7.668  
7.659  
7.655  
7.646  
7.635  
7.623  
7.618  
7.616  
7.597  
7.580  
7.577  
7.548  
7.545  
7.535  
7.533  
7.307  
7.288  
7.287  
7.270  
7.268  
7.258  
7.203  
7.194  
7.191  
7.181  
1.567  
-0.000

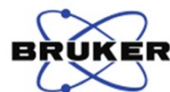

Current Data Parameters  
NAME Desktop  
SWSO 2  
PROCNO 1

PC - Acquisition Parameters  
Date\_ 20180103  
Time 10.56  
INSTRUM spect  
PROBHD 5 mm PABBO BB/  
PULPROG zgpg  
TD 65536  
SOLVENT CDCl3  
NS 1  
DS 2  
SWH 8223.685 Hz  
FIDRES 0.128483 Hz  
AQ 3.984509 sec  
RG 169.6  
RW 60.800 usec  
DE 6.50 usec  
TE 298.2 K  
D1 1.00000000 sec  
TDO 1

===== CHANNEL f1 =====  
NUC1 1H  
P1 14.25 usec  
PLW1 14.00000000 W  
SFO1 400.2604718 MHz  
  
F2 - Processing parameters  
SI 65536  
SF 400.2604718 MHz  
WDW EM  
SSB 0  
LB 0.30 Hz  
GB 0  
PC 1.00

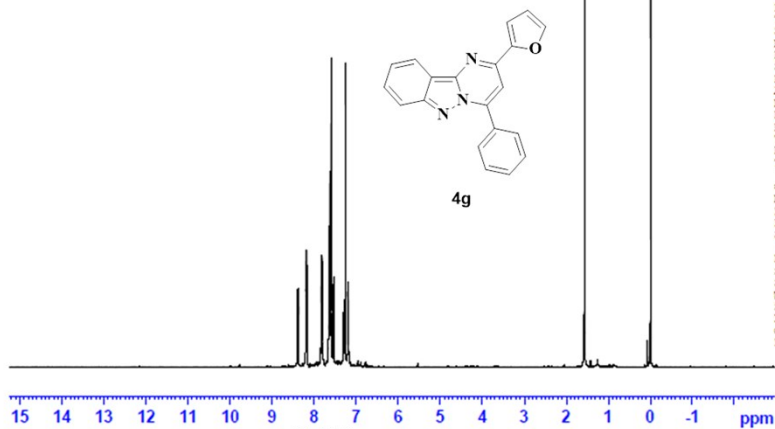

### Expanded <sup>1</sup>H NMR spectrum of compound (4g):

Signature SIF VIT VELLORE  
JPR-236-10P

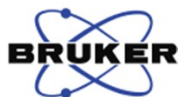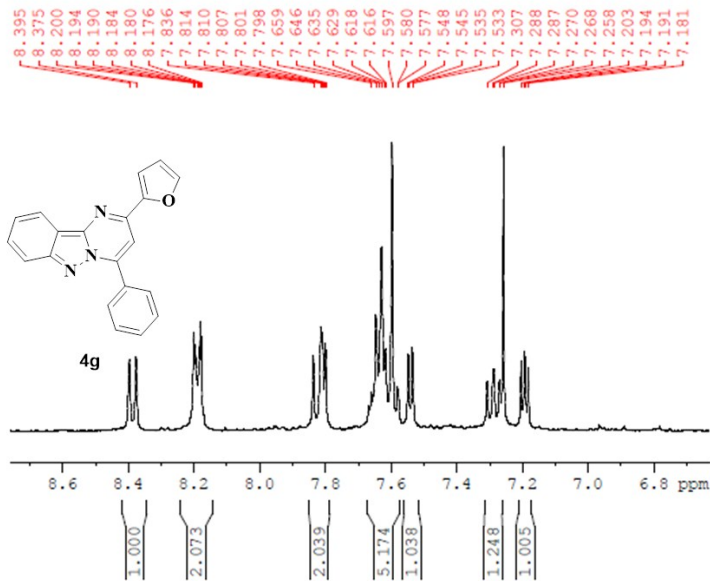

Current Data Parameters  
NAME Desktop  
EXPNO 1  
PROCNO 1

F2 - Acquisition Parameters  
Date\_ 20180103  
Time 10.56  
INSTRUM spect  
PROBHD 5 mm PABBO BB/  
PULPROG zg30  
TD 65536  
SOLVENT CDCl3  
NS 16  
DS 2  
SWH 8223.685 Hz  
FIDRES 0.125483 Hz  
AQ 2.984889 sec  
RG 198.6  
DW 60.800 usec  
DE 6.80 usec  
TE 298.2 K  
D1 1.0000000 sec  
TDO 1

===== CHANNEL f1 =====  
NUC1 1H  
P1 14.25 usec  
PLW1 14.0000000 W  
SF01 400.2604718 MHz

F2 - Processing parameters  
SI 65536  
SF 400.2580125 MHz  
WDW EM  
SSB 0  
LB 0.30 Hz  
GB 0  
FC 1.00

### <sup>13</sup>C NMR spectrum of compound (4g):

Signature SIF VIT VELLORE  
JPR-236-10P

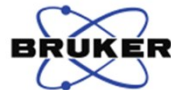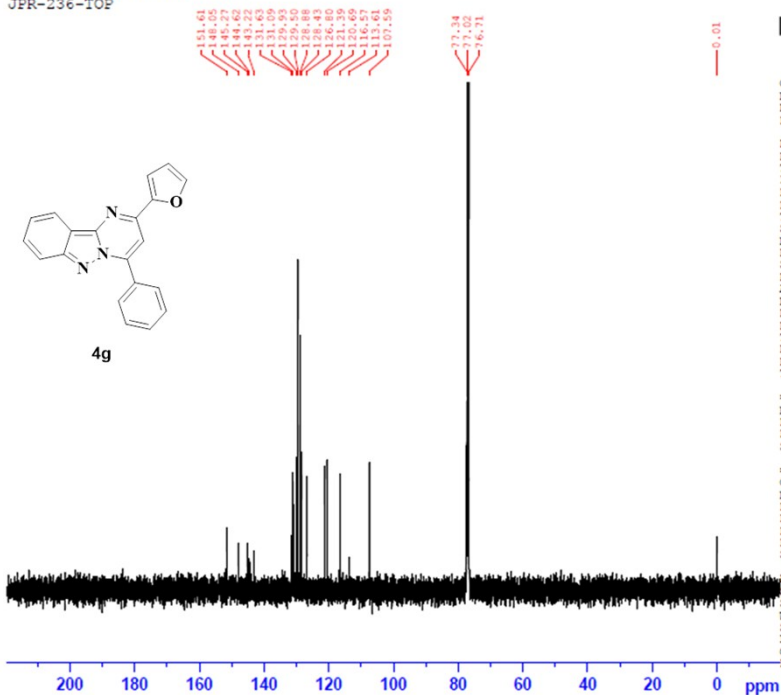

Current Data Parameters  
NAME Desktop  
EXPNO 5  
PROCNO 1

F2 - Acquisition Parameters  
Date\_ 20180103  
Time 18.31  
INSTRUM spect  
PROBHD 5 mm PABBO BB/  
PULPROG zgpg30  
TD 65536  
SOLVENT CDCl3  
NS 812  
DS 4  
SWH 24098.461 Hz  
FIDRES 0.366798 Hz  
AQ 1.3631488 sec  
RG 71.13  
DW 20.800 usec  
DE 6.80 usec  
TE 298.4 K  
D1 2.0000000 sec  
D11 0.0300000 sec  
TDO 1

===== CHANNEL f1 =====  
NUC1 13C  
P1 9.80 usec  
PLW1 58.0000000 W  
SF01 100.6250182 MHz

===== CHANNEL f2 =====  
CPDPRG12 waltz16  
NUC2 1H  
PCPD2 90.00 usec  
PLW2 14.0000000 W  
PLW12 0.38097000 W  
PLW13 0.28428999 W  
SF02 400.2596010 MHz

F2 - Processing parameters  
SI 32768  
SF 100.6449840 MHz  
WDW EM  
SSB 0  
LB 1.00 Hz  
GB 0  
FC 1.40

### HRMS spectrum of compound (4g):



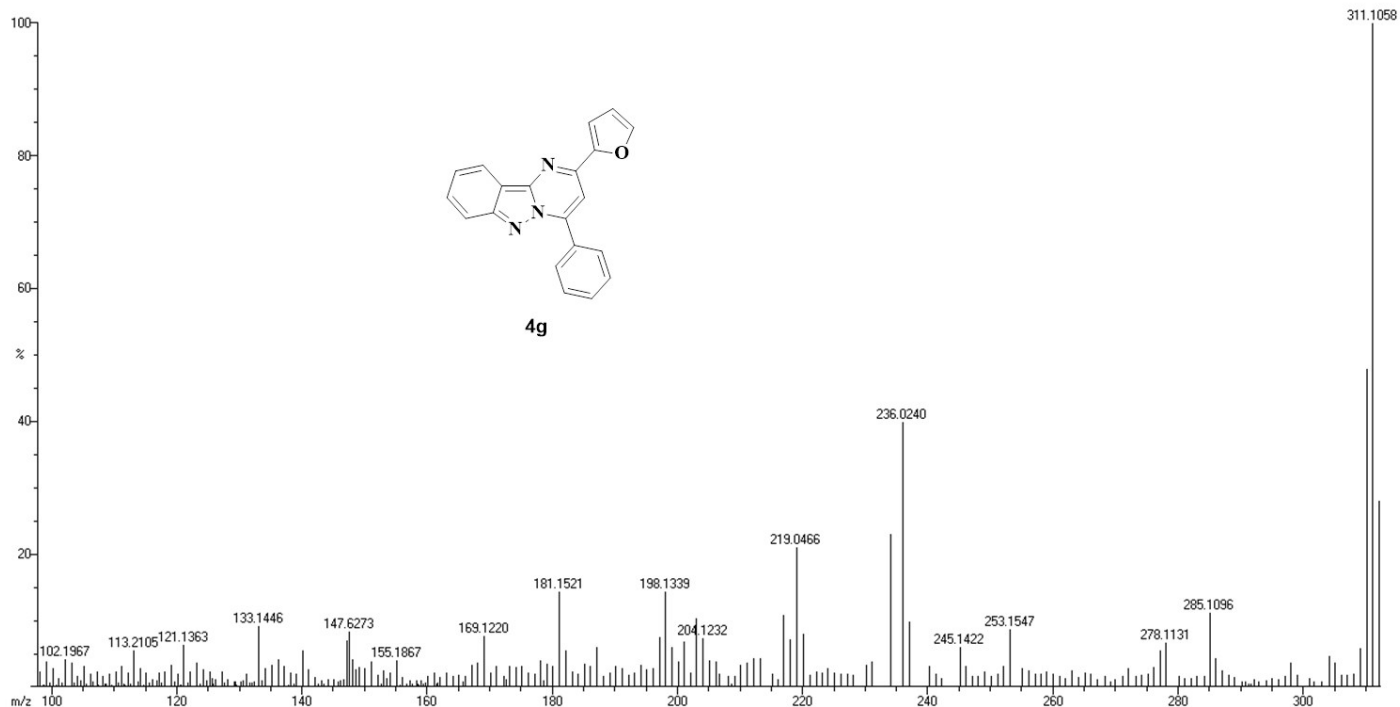

### <sup>1</sup>H NMR spectrum of compound (4h):

Signature SIF VIT VELLORE  
JPR-308-P

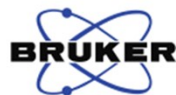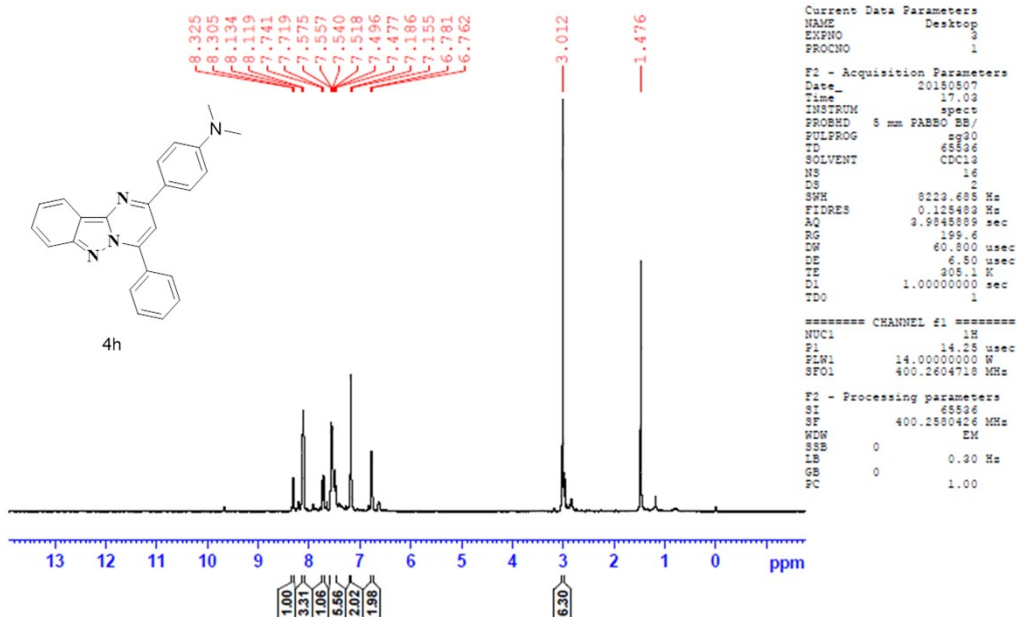

### Expanded <sup>1</sup>H NMR spectrum of compound (4h):

Signature SIF VIT VELLORE  
JPR-308-P

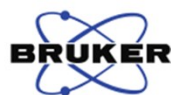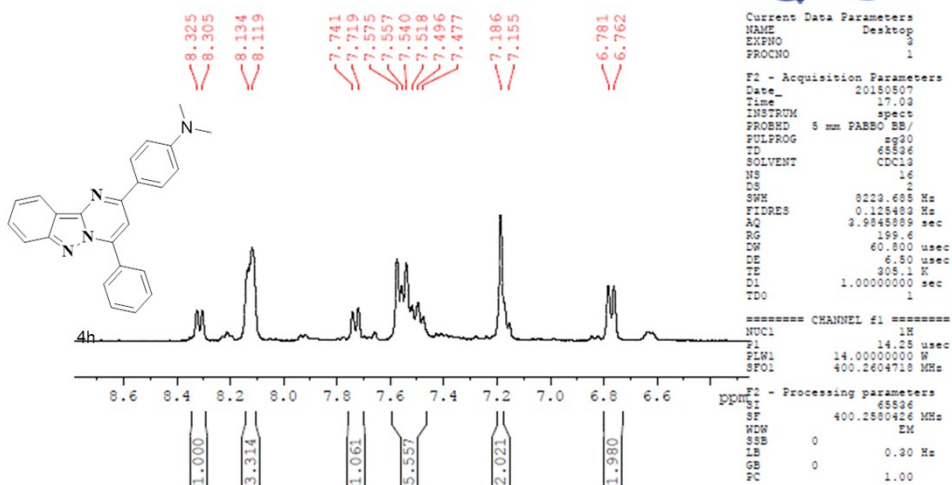

### <sup>13</sup>C NMR spectrum of compound (4h):

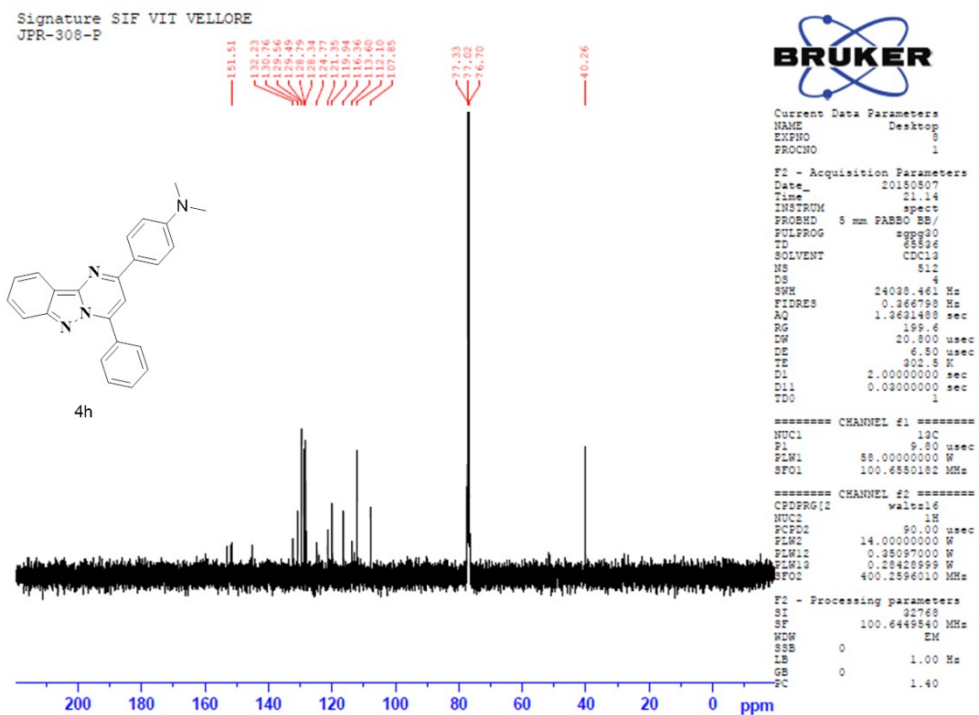

### HRMS spectrum of compound (4h):

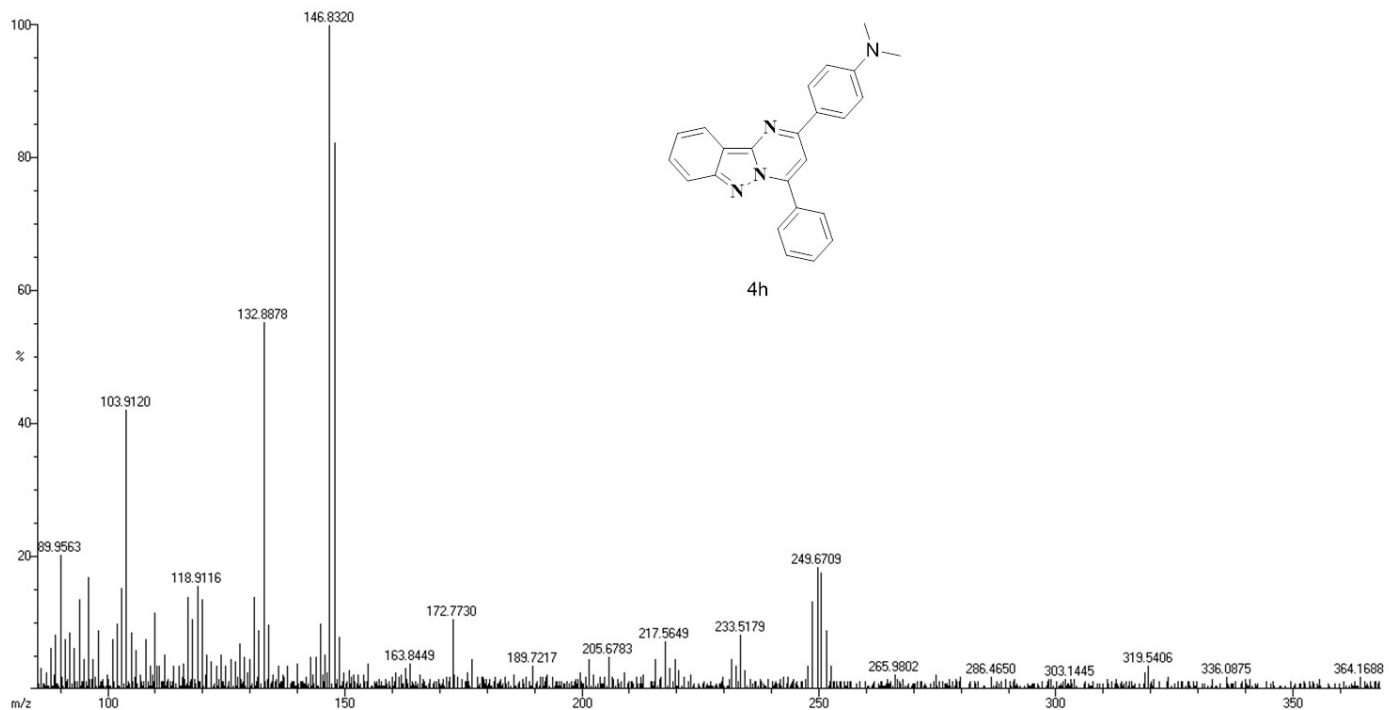

**<sup>1</sup>H NMR spectrum of compound (4i):**

Signature SIF VIT VELLORE  
JPR-246-P

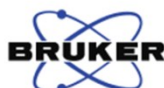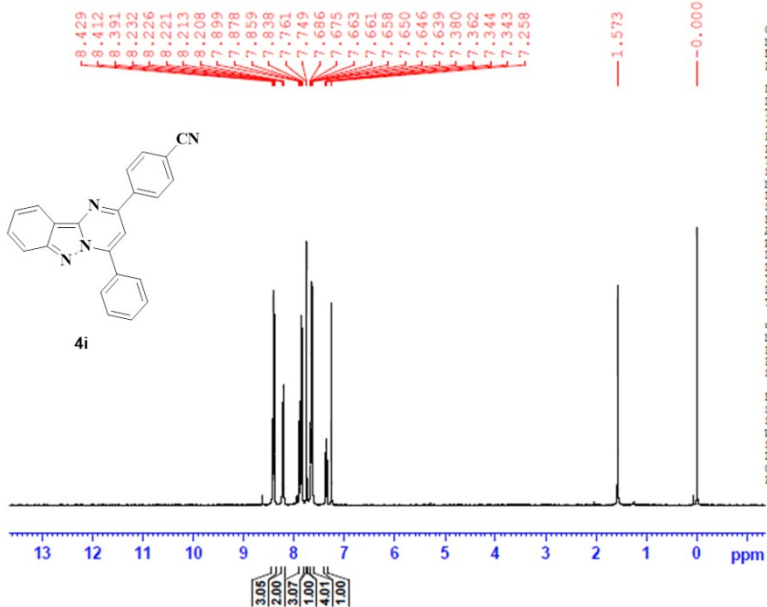

Current Data Parameters  
NAME Desktop  
EXPNO 1  
PROCNO 1

F2 - Acquisition Parameters  
Date\_ 20180113  
Time 12.01  
INSTRUM spect  
PROBHD 5 mm PABBO BB/  
PULPROG zg30  
TD 65536  
SOLVENT CDCl3  
NS 16  
DS 2  
SWH 8223.688 KHz  
FIDRES 0.1125482 KHz  
AQ 3.9848929 sec  
RG 175.97  
DW 60.800 usec  
DE 6.50 usec  
TE 297.4 K  
D1 1.00000000 sec  
TDO 1

\*\*\*\*\* CHANNEL f1 \*\*\*\*\*  
NUC1 1H  
P1 14.25 usec  
P1M1 14.0000000 W  
SFO1 400.2604718 MHz

F1 - Processing parameters  
SI 65536  
SF 400.2604718 MHz  
WDW EM  
SSB 0  
LB 0.30 KHz  
GB 0  
PC 1.00

## Expanded <sup>1</sup>H NMR spectrum of compound (4i):

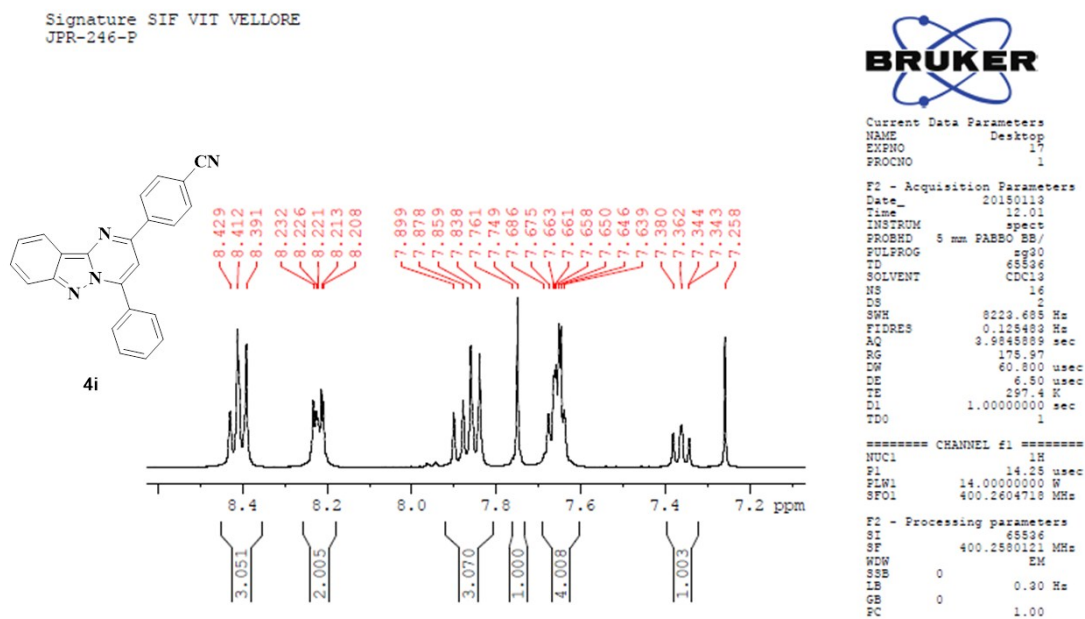

## <sup>13</sup>C NMR spectrum of compound (4i):

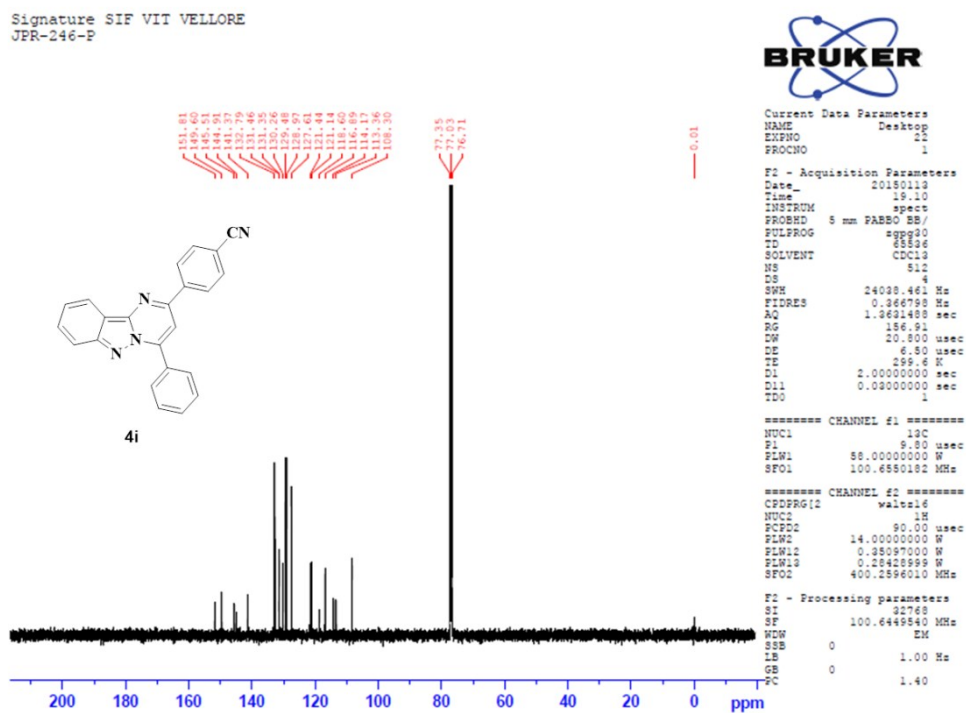

## HRMS spectrum of compound (4i):

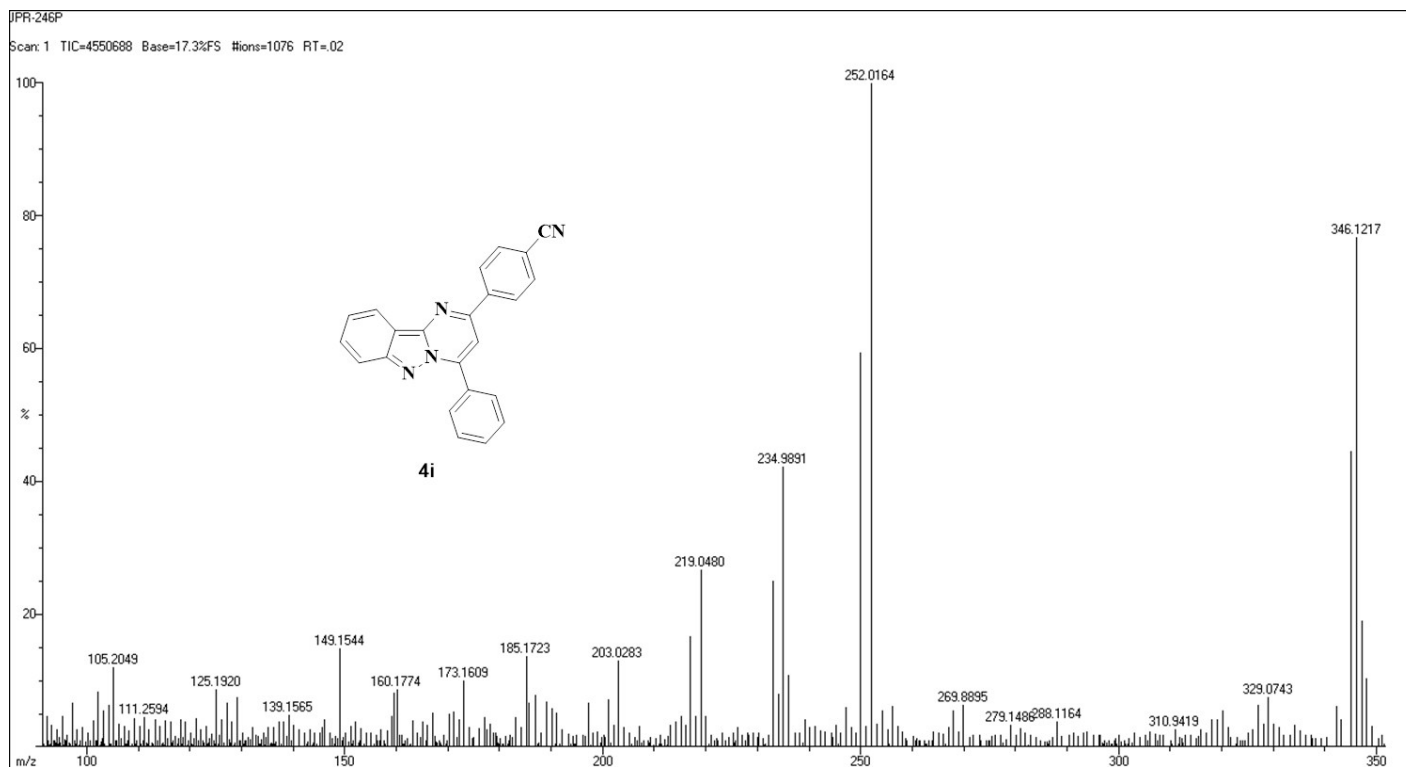

## <sup>1</sup>H NMR spectrum of compound (4j):

Signature SIF VIT VELLORE  
JPR-239-P

8.477  
8.464  
8.459  
8.454  
8.451  
8.430  
8.428  
8.422  
8.417  
8.405  
8.400  
8.246  
8.239  
8.235  
8.226  
8.222  
7.912  
7.890  
7.795  
7.691  
7.688  
7.683  
7.674  
7.671  
7.667  
7.660  
7.656  
7.650  
7.400  
7.398  
7.381  
7.380  
7.362  
7.260  
1.571  
-0.000

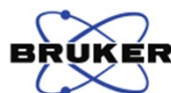

Current Data Parameters  
NAME Desktop  
EXPNO 8  
PROCNO 1

F2 - Acquisition Parameters  
Date\_ 20150106  
Time 15.37  
INSTRUM spect  
PROBHD 5 mm PABBO BB/  
PULPROG zgpg  
TD 65536  
SOLVENT CDCl3  
NS 16  
DS 2  
SWH 3223.685 Hz  
FIDRES 0.125493 Hz  
AQ 3.984809 sec  
RG 195.6  
DW 40.800 usec  
DE 6.50 usec  
TE 296.2 K  
DL 1.00000000 sec  
TDO 1

\*\*\*\*\* CHANNEL f1 \*\*\*\*\*  
NUCL 1H  
P1 14.25 usec  
PLW1 14.00000000 W  
SFO1 400.2604718 MHz  
  
F2 - Processing parameters  
SI 65536  
SF 400.260114 MHz  
WDW EM  
SSB 0  
LB 0.30 Hz  
GB 0  
FC 1.00

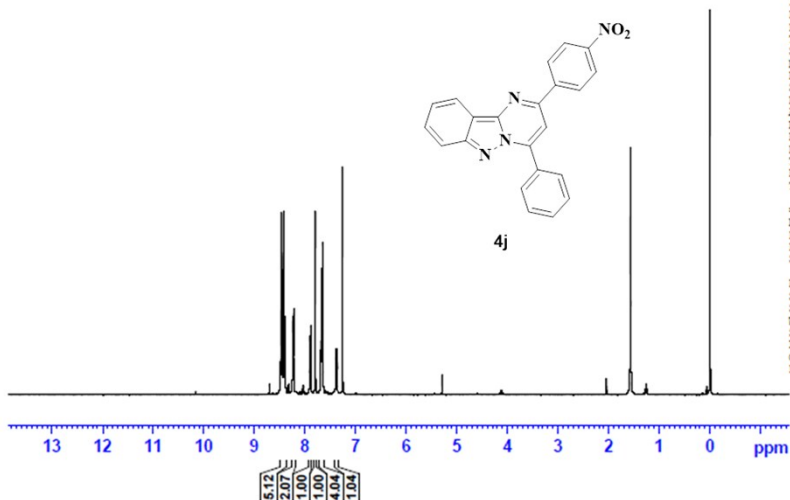

## Expanded <sup>1</sup>H NMR spectrum of compound (4j):

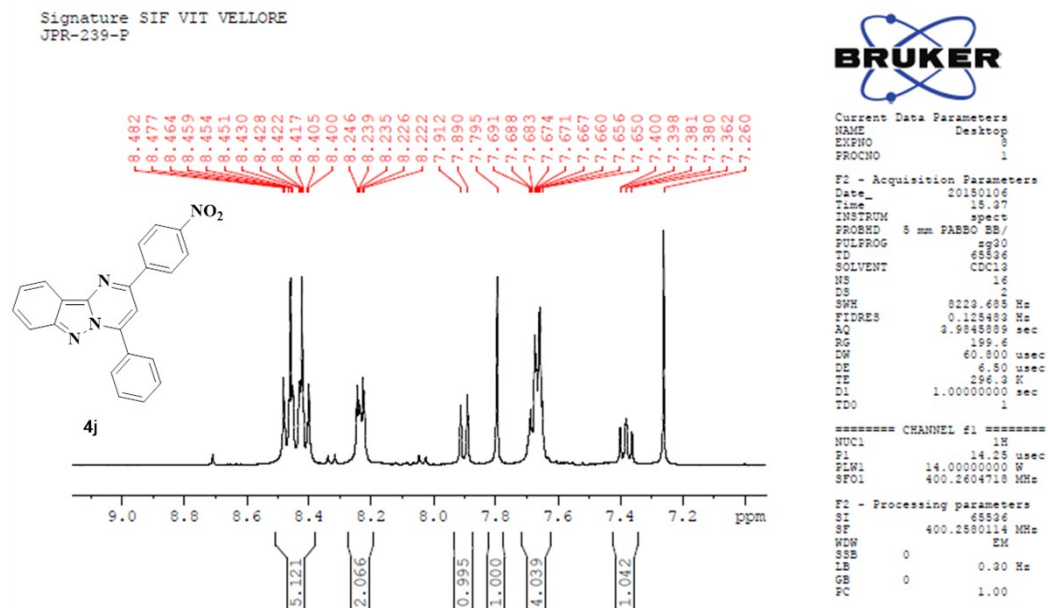

## <sup>13</sup>C NMR spectrum of compound (4j):

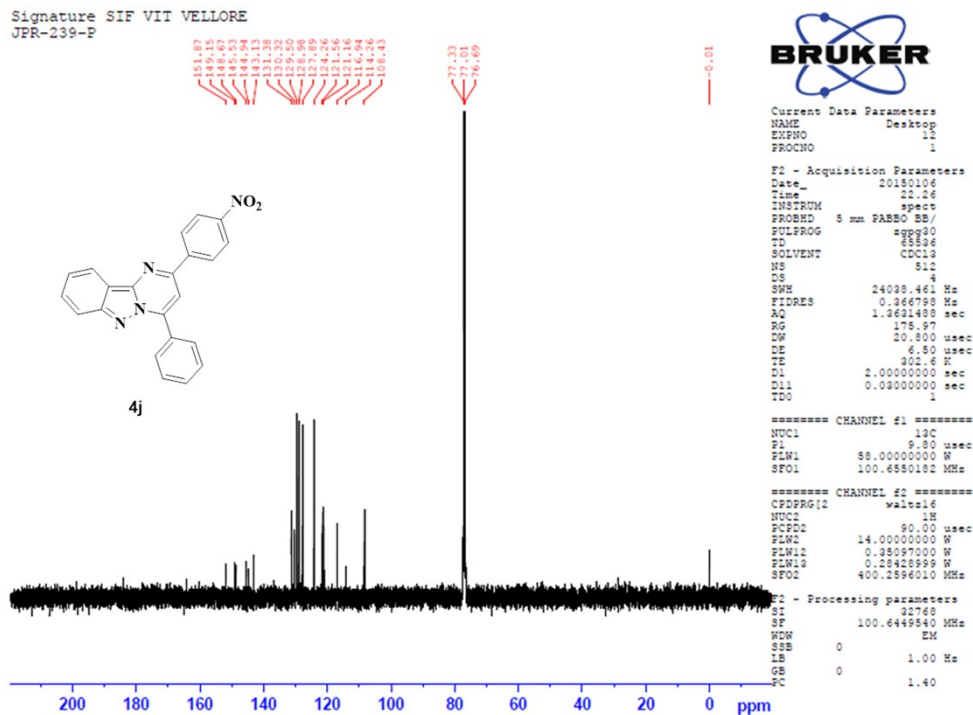

## HRMS spectrum of compound (4j):

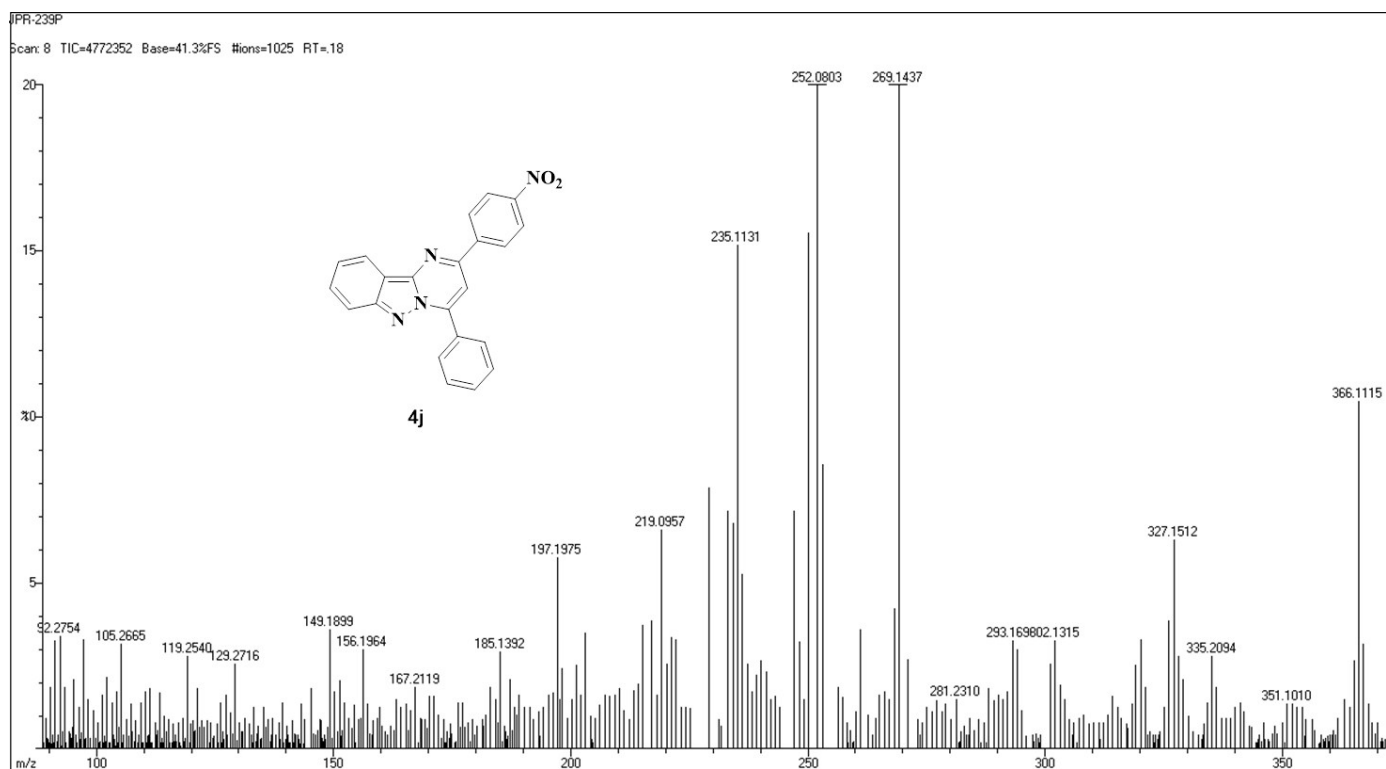

## <sup>1</sup>H NMR spectrum of compound (4k):

Signature SIF VII VELLORE  
JPR-247-P

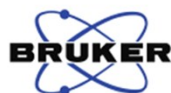

9.762  
8.363  
8.354  
8.345  
8.339  
8.335  
8.156  
7.994  
7.991  
7.874  
7.840  
7.819  
7.717  
7.707  
7.698  
7.695  
7.687  
7.681  
7.661  
7.659  
7.640  
7.638  
7.428  
7.409  
7.389  
7.357  
7.338  
7.320  
6.995  
6.991  
6.987  
6.973  
6.968  
3.355  
2.517  
2.513  
2.509

Current Data Parameters  
NAME Desktop  
EXPNO 21  
PROCNO 1

F2 - Acquisition Parameters  
Date\_ 20150113  
Time 16.48  
INSTRUM spect  
PROBHD 5 mm PABBO BB/  
PULPROG zg30  
TD 65536  
SOLVENT DMSO  
NS 16  
DS 2  
SWH 8223.685 Hz  
FIDRES 0.125468 Hz  
AQ 2.9845889 sec  
RG 156.91  
DM 60.800 usec  
LE 6.50 usec  
FE 386.6 Hz  
D1 1.00000000 sec  
TDO 1

===== CHANNEL f1 =====  
NUC1 1H  
P1 14.25 usec  
PLW1 14.00000000 W  
SFO1 400.2604718 MHz  
  
F2 - Processing parameters  
SI 65536  
SF 400.260000 MHz  
WDW EM  
SSB 0  
LB 0.30 Hz  
GB 0  
FC 1.00

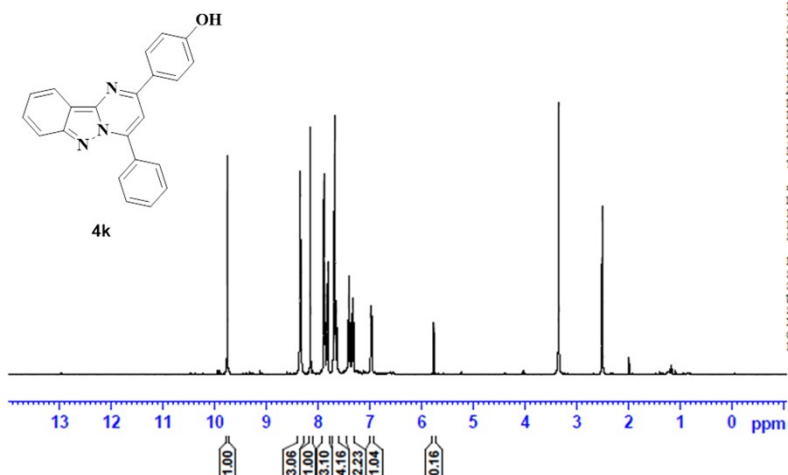

## Expanded <sup>1</sup>H NMR spectrum of compound (4k):

Signature SIF VIT VELLORE  
JPR-247-P

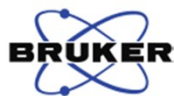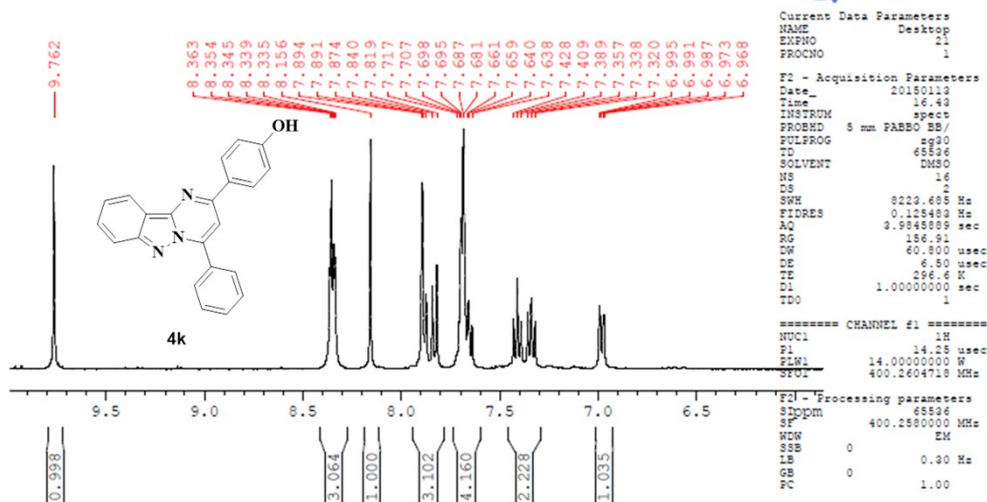

## <sup>13</sup>C NMR spectrum of compound (4k):

Signature SIF VIT VELLORE  
JPR-247-P

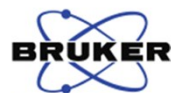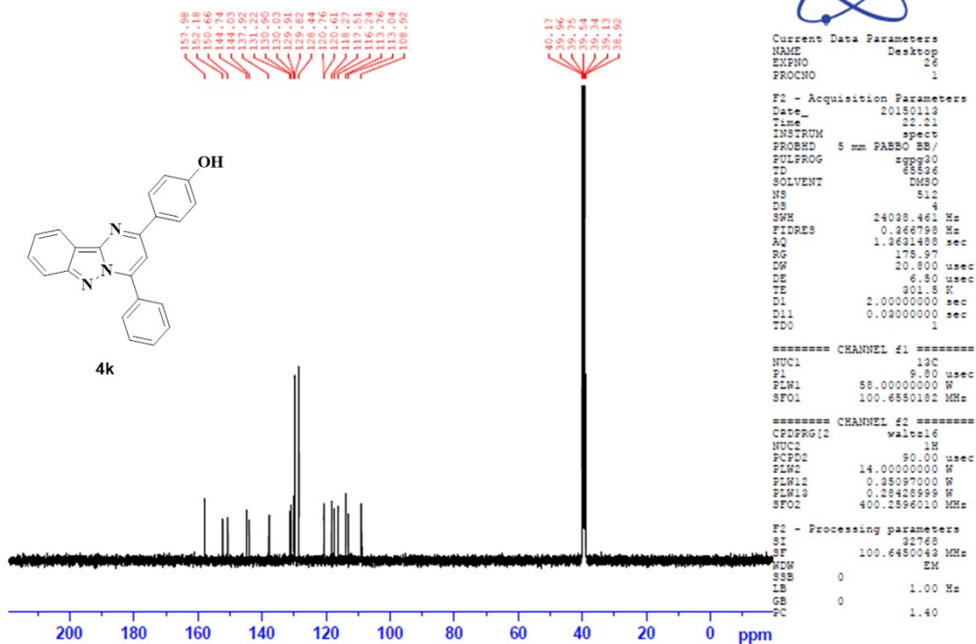



## HRMS spectrum of compound (4k):

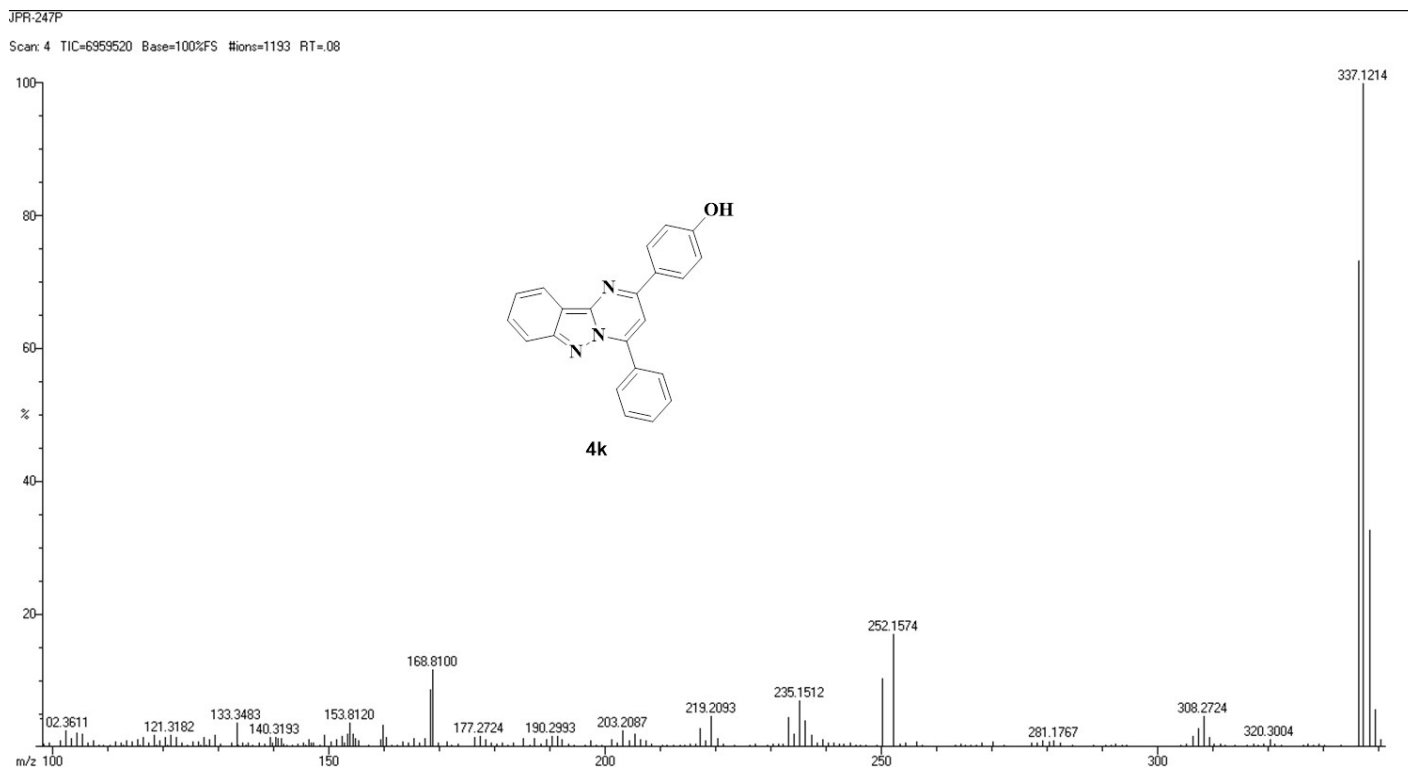

## <sup>1</sup>H NMR spectrum of compound (4l):

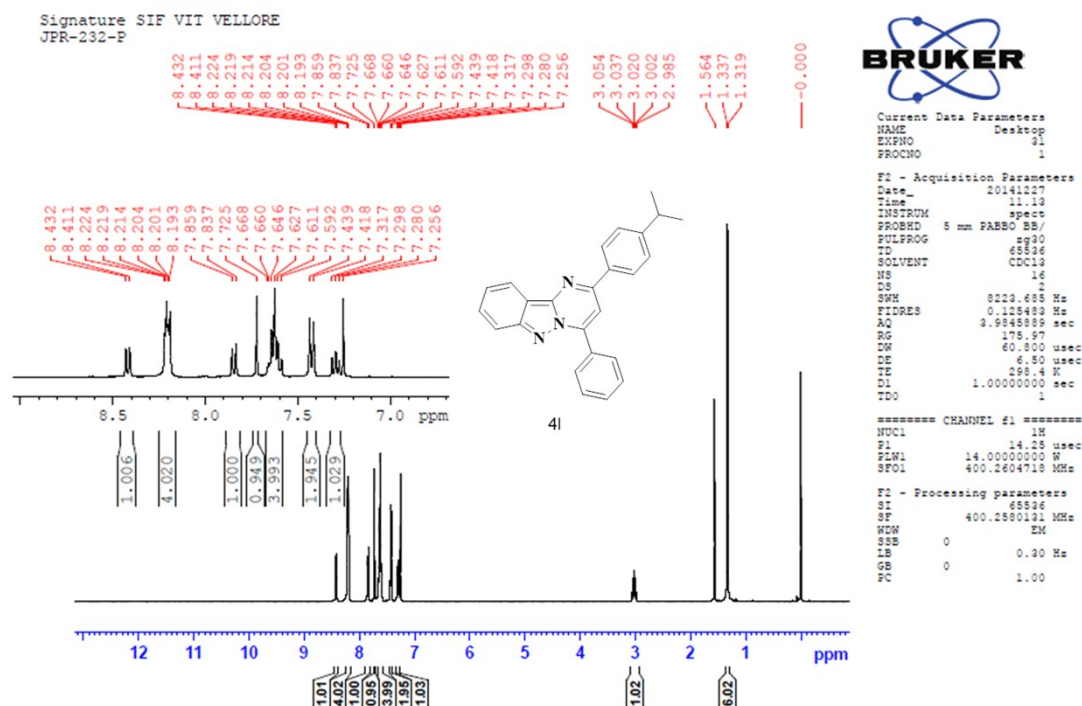

### <sup>13</sup>C NMR spectrum of compound (4l):

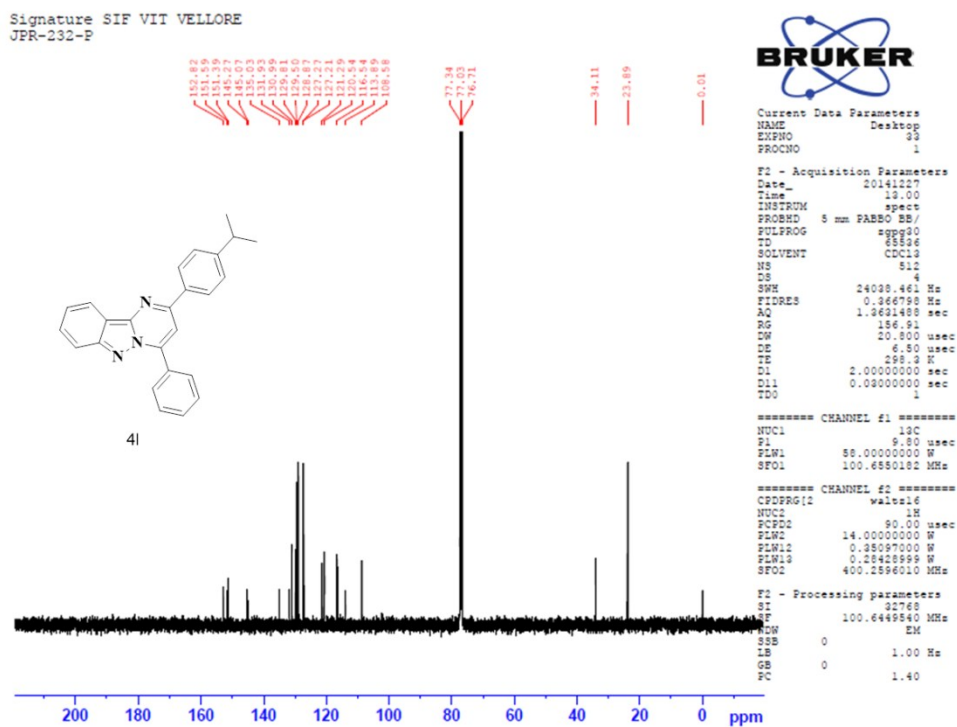

### HRMS spectrum of compound (4l):

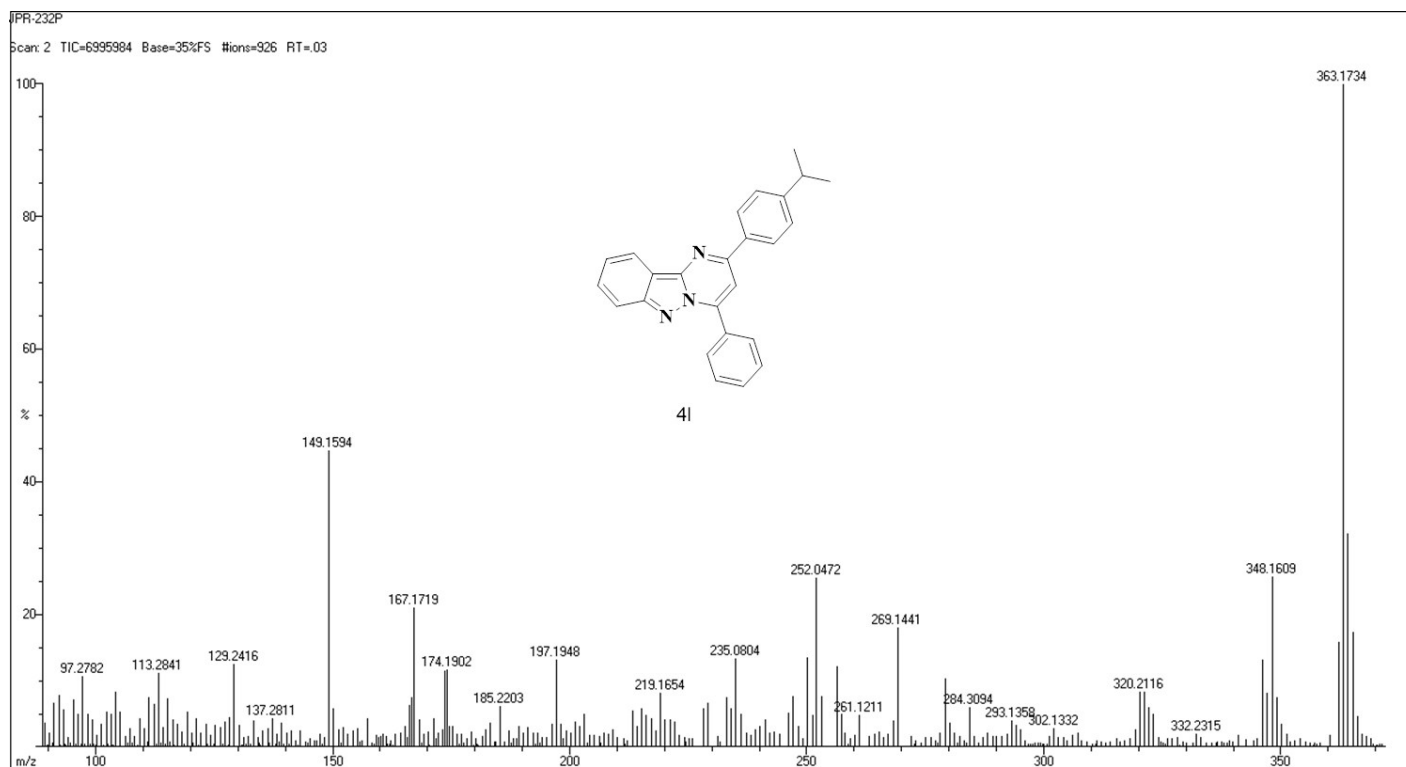

# <sup>1</sup>H NMR spectrum of compound (4m):

Signature SIF VIT VELLORE  
JPR-237-P

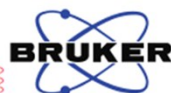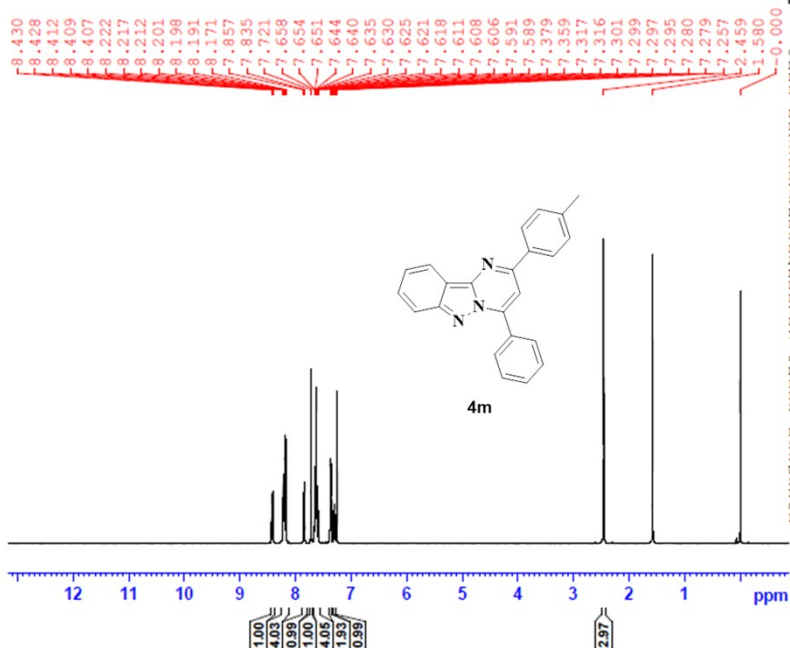

```
Current Data Parameters
NAME      Desktop
EXPNO    10
PROCNO   1

F2 - Acquisition Parameters
Date_    20180106
Time     15.44
INSTRUM spect
PROBHD   5 mm PABBO BB/
PULPROG zg30
TD       65536
SOLVENT  CDCl3
NS       16
DS       2
SWH      8223.685 Hz
FIDRES   0.125493 Hz
AQ       3.9845893 sec
RG       175.97
DW       60.800 usec
DE       6.30 usec
TE       296.4 K
D1       1.00000000 sec
TDO      1

===== CHANNEL f1 =====
NUC1     1H
P1       14.25 usec
PLW1     14.00000000 W
SFO1     400.2604718 MHz

F2 - Processing parameters
SI       65536
SF       400.260129 MHz
WDW      EM
SSB      0
LB       0.30 Hz
GB       0
FC       1.00
```

# Expanded <sup>1</sup>H NMR spectrum of compound (4m):

Signature SIF VIT VELLORE  
JPR-237-P

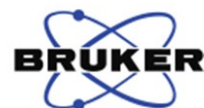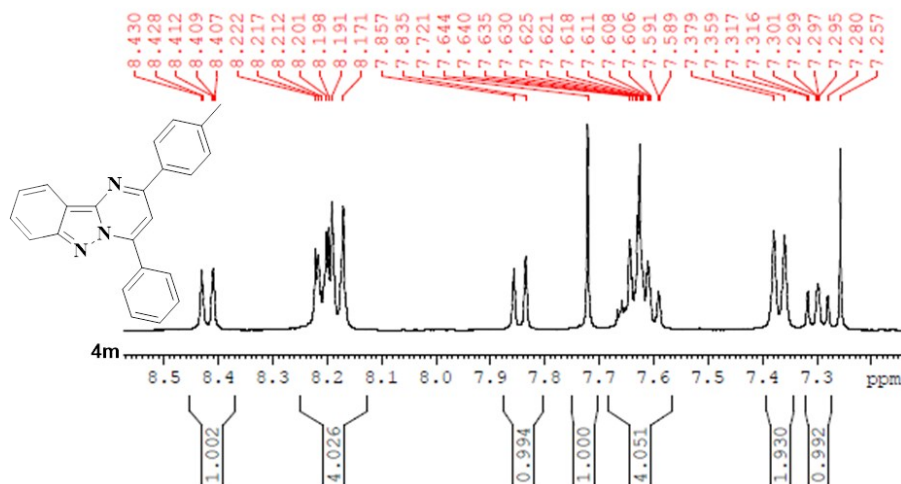

```
Current Data Parameters
NAME      Desktop
EXPNO    10
PROCNO   1

F2 - Acquisition Parameters
Date_    20180106
Time     15.44
INSTRUM spect
PROBHD   5 mm PABBO BB/
PULPROG zg30
TD       65536
SOLVENT  CDCl3
NS       16
DS       2
SWH      8223.685 Hz
FIDRES   0.125493 Hz
AQ       3.9845893 sec
RG       175.97
DW       60.800 usec
DE       6.30 usec
TE       296.4 K
D1       1.00000000 sec
TDO      1

===== CHANNEL f1 =====
NUC1     1H
P1       14.25 usec
PLW1     14.00000000 W
SFO1     400.2604718 MHz

F2 - Processing parameters
SI       65536
SF       400.260129 MHz
WDW      EM
SSB      0
LB       0.30 Hz
GB       0
FC       1.00
```

### <sup>13</sup>C NMR spectrum of compound (4m):

Signature SIF VIT VELLORE  
JPR-237-P

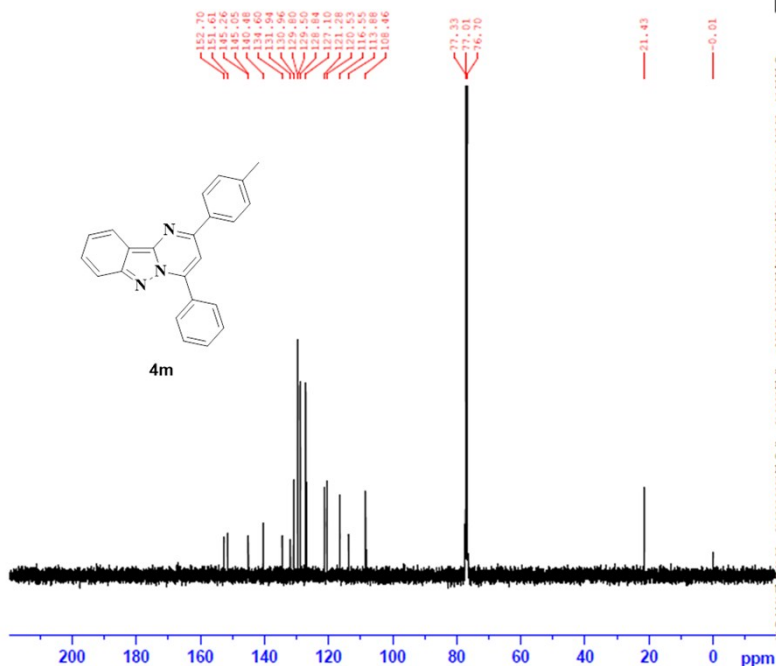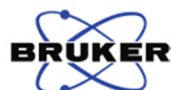

Current Data Parameters  
NAME Desktop  
EXPNO 18  
PROCNO 1

FC - Acquisition Parameters  
Date\_ 20150106  
Time 23.28  
INSTRUM spect  
PROBHD 5 mm F4BBO BB/  
PULPROG zgpg30  
TD 65536  
SOLVENT CDCl3  
NS 512  
DS 4  
SWH 24038.461 Hz  
FIDRES 0.366798 Hz  
AQ 1.3691488 sec  
RG 112.69  
AQ 80.800 usec  
DE 6.50 usec  
TE 302.2 K  
D1 2.0000000 sec  
D11 0.0200000 sec  
TDO 1

===== CHANNEL f1 =====  
NUC1 13C  
P1 9.80 usec  
PLW1 58.0000000 W  
SFO1 100.6283602 MHz

===== CHANNEL f2 =====  
CPDPRG12 waltz16  
NUC2 1H  
PCPD2 90.00 usec  
PLW2 14.0000000 W  
PLW12 0.28097000 W  
PLW13 0.2842899 W  
SFO2 400.2596010 MHz

FC - Processing parameters  
SI 32768  
SF 100.6449540 MHz  
WDW EM  
SSB 0  
LB 1.00 Hz  
GB 0  
PC 1.40

### HRMS spectrum of compound (4m):

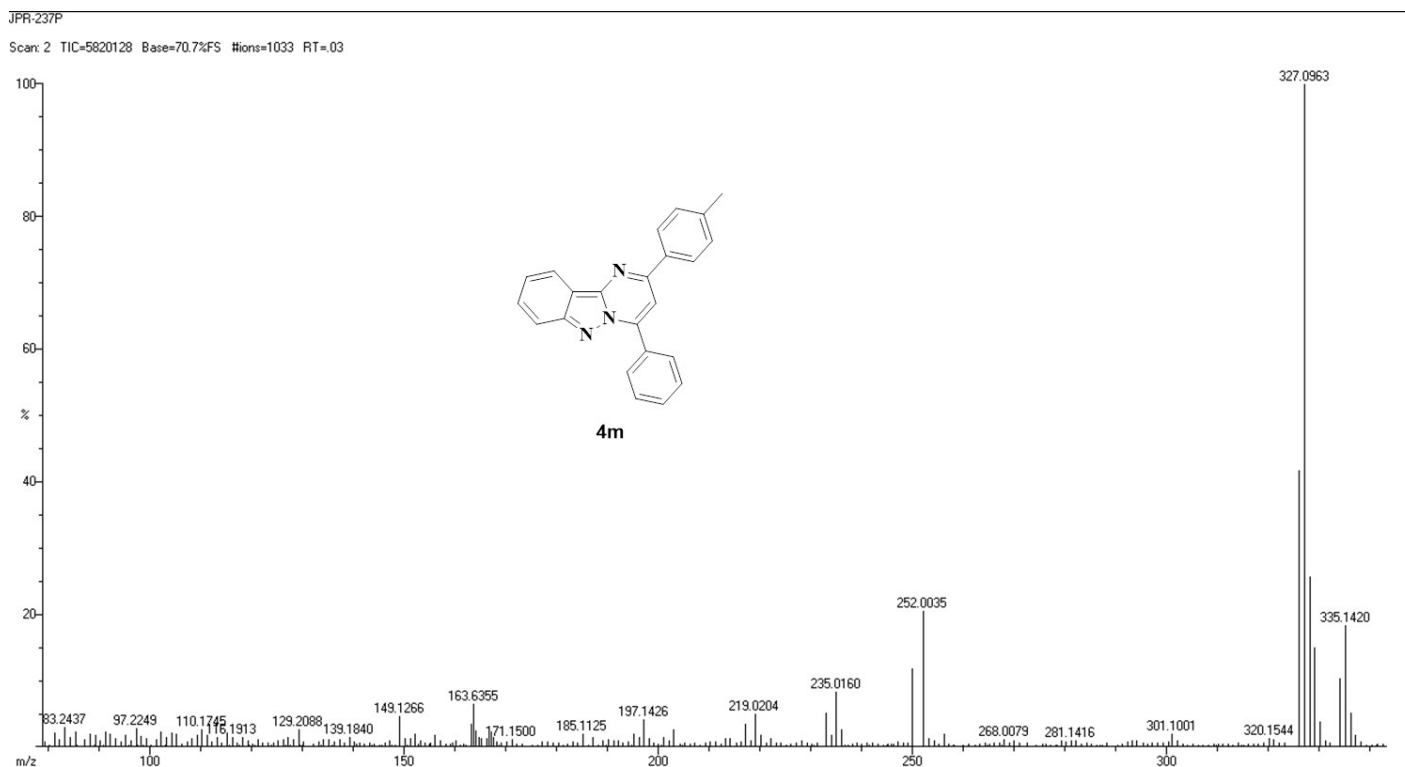

# <sup>1</sup>H NMR spectrum of compound (4n):

Signature SIF VIT VELLORE  
JPR-242-P

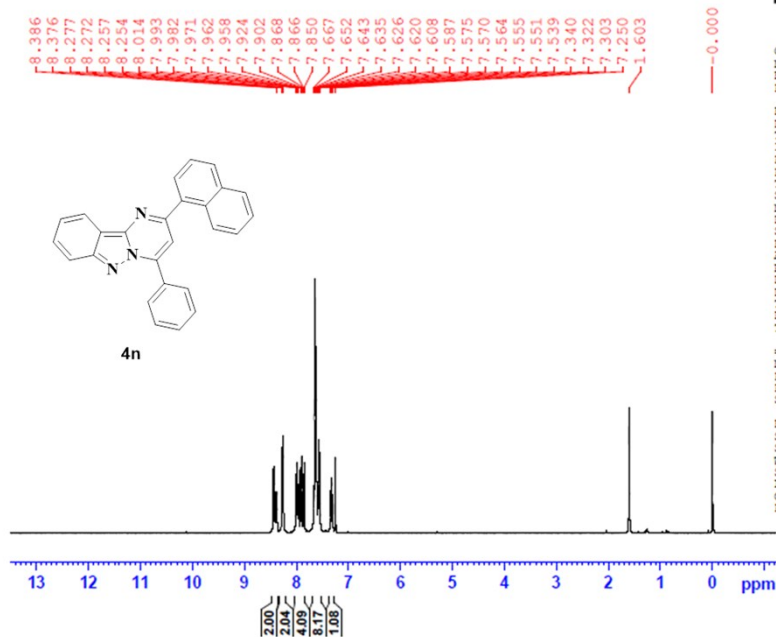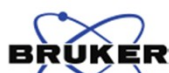

```
Current Data Parameters
NAME      Desktop
EXPNO    11
PROCNO   1

F2 - Acquisition Parameters
Date_    20180106
Time     17.12
INSTRUM spect
PROBHD   5 mm PABBO BB/
PULPROG zg30
TD       65536
SOLVENT  CDCl3
NS       16
DS       2
SWH      8223.688 Hz
FIDRES   0.128483 Hz
AQ       3.9848889 sec
RG       143.73
DM       60.800 usec
DE       6.50 usec
TE       296.0 K
D1       1.00000000 sec
TDO      1

===== CHANNEL f1 =====
NUC1     1H
P1       14.25 usec
PLN1     14.00000000 W
SFO1     400.2604718 MHz

F2 - Processing parameters
SI       65536
SF       400.2580156 MHz
WDW      EM
SSB      0
LB       0.30 Hz
GB       0
WC       1.00
```

# Expanded <sup>1</sup>H NMR spectrum of compound (4n):

Signature SIF VIT VELLORE  
JPR-242-P

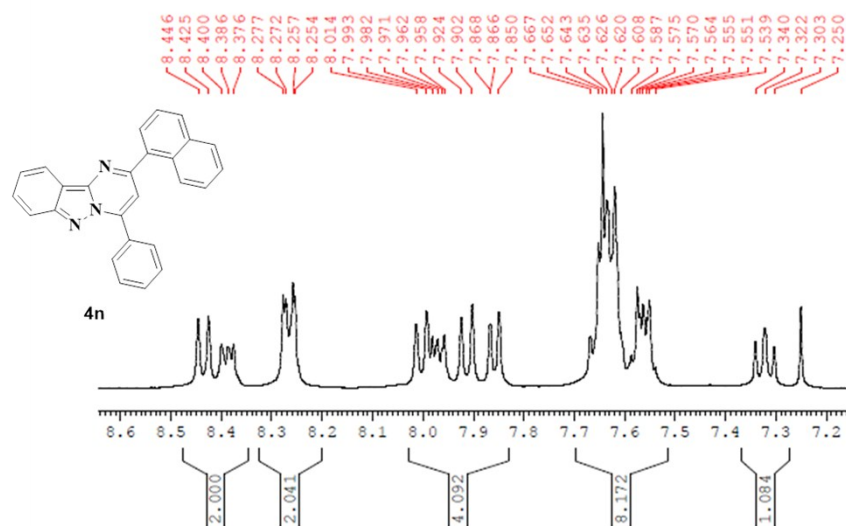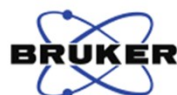

```
Current Data Parameters
NAME      Desktop
EXPNO    11
PROCNO   1

F2 - Acquisition Parameters
Date_    20180106
Time     17.12
INSTRUM spect
PROBHD   5 mm PABBO BB/
PULPROG zg30
TD       65536
SOLVENT  CDCl3
NS       16
DS       2
SWH      8223.688 Hz
FIDRES   0.128483 Hz
AQ       3.9848889 sec
RG       143.73
DM       60.800 usec
DE       6.50 usec
TE       296.0 K
D1       1.00000000 sec
TDO      1

===== CHANNEL f1 =====
NUC1     1H
P1       14.25 usec
PLN1     14.00000000 W
SFO1     400.2604718 MHz

F2 - Processing parameters
SI       65536
SF       400.2580156 MHz
WDW      EM
SSB      0
LB       0.30 Hz
GB       0
WC       1.00
```

## <sup>13</sup>C NMR spectrum of compound (4n):

Signature SIF VIT VELLORE  
JPR-242-P

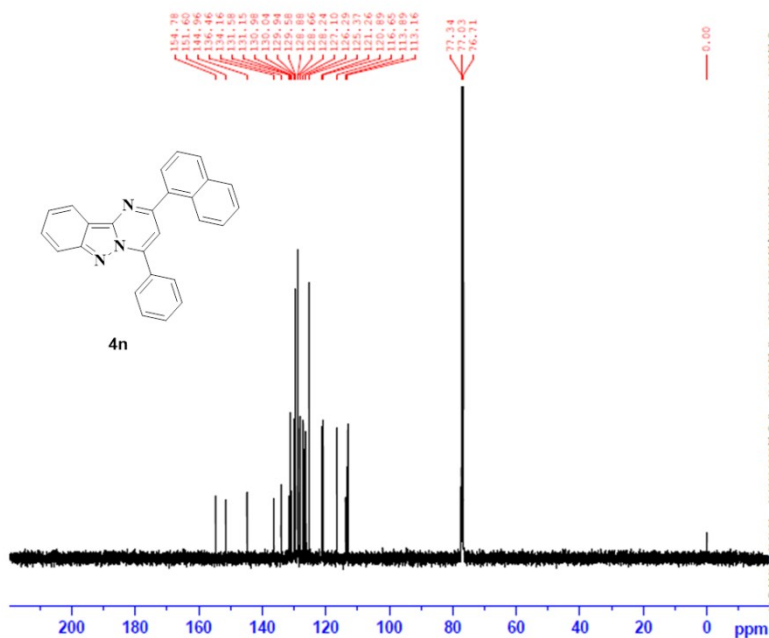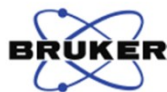

Current Data Parameters  
NAME Desktop  
EXPNO 16  
PROCNO 1

F2 - Acquisition Parameters  
Date\_ 20150107  
Time 2.07  
INSTRUM spect  
PROBHD 5 mm PABBO BB/  
PULPROG zgpg30  
TD 65536  
SOLVENT CDCl3  
NS 512  
DS 4  
SWH 24029.461 KHz  
FIDRES 0.366798 KHz  
AQ 1.2621408 sec  
RG 199.6  
RW 20.800 usec  
DE 6.50 usec  
TE 303.4 K  
D1 2.0000000 sec  
D11 0.0200000 sec  
TDO 1

==== CHANNEL f1 =====  
NUC1 13C  
P1 9.80 usec  
PLW1 55.0000000 W  
SFO1 100.6250132 MHz

==== CHANNEL f2 =====  
CPDPRG12 waltz16  
NUC2 1H  
PCPD2 90.00 usec  
PLW2 14.0000000 W  
PLW12 0.35097000 W  
PLW13 0.2542899 W  
SFO2 400.2596010 MHz

F2 - Processing parameters  
SI 32768  
SF 100.6449540 MHz  
WDW EM  
SSB 0  
LB 1.00 Hz  
GB 0  
ZC 1.40

## HRMS spectrum of compound (4n):

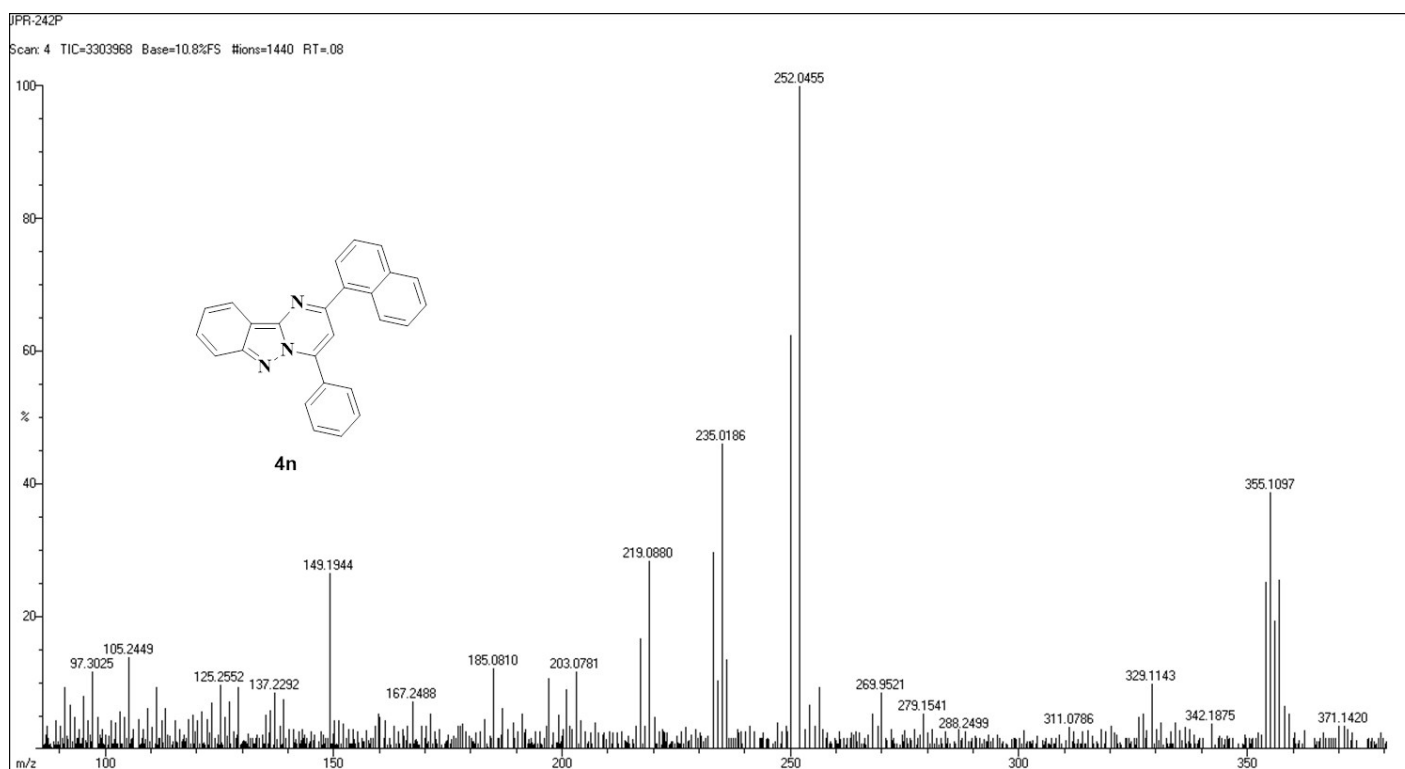

# <sup>1</sup>H NMR spectrum of compound (4o):

Signature SIF VIT VELLORE  
JPR-248-P

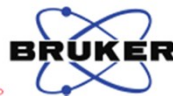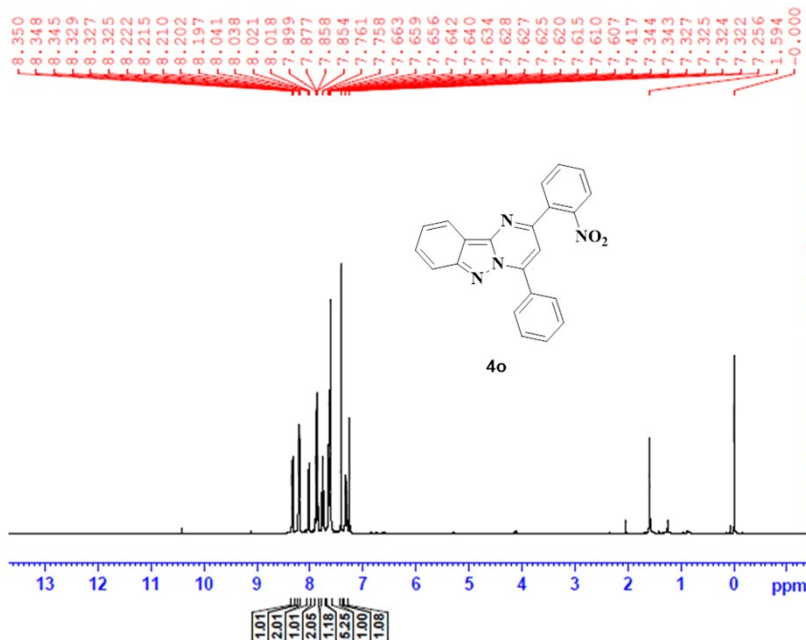

```
Current Data Parameters
NAME      Desktop
EXPNO    19
PROCNO   1

F2 - Acquisition Parameters
Date_    20150113
Time     12.08
INSTRUM  spect
PROBHD   5 mm F4BBO BB/
PULPROG  zg30
TD        65536
SOLVENT  CDCl3
NS        16
DS        2
SWH       8223.685 Hz
FIDRES    0.125483 Hz
AQ        3.9845889 sec
RG        156.91
EW        60.500 usec
DE        6.50 usec
TE        297.4 K
DL        1.00000000 sec
TDO       1

===== CHANNEL f1 =====
NUC1     1H
P1       14.25 usec
PLW1     14.0000000 W
SFOL     400.2604718 MHz

F2 - Processing parameters
SI       65536
SF       400.2580130 MHz
WDW      EM
SSB      0
GB       0.30 Hz
PC       1.00
```

# Expanded <sup>1</sup>H NMR spectrum of compound (4o):

Signature SIF VIT VELLORE  
JPR-248-P

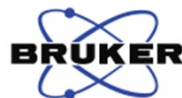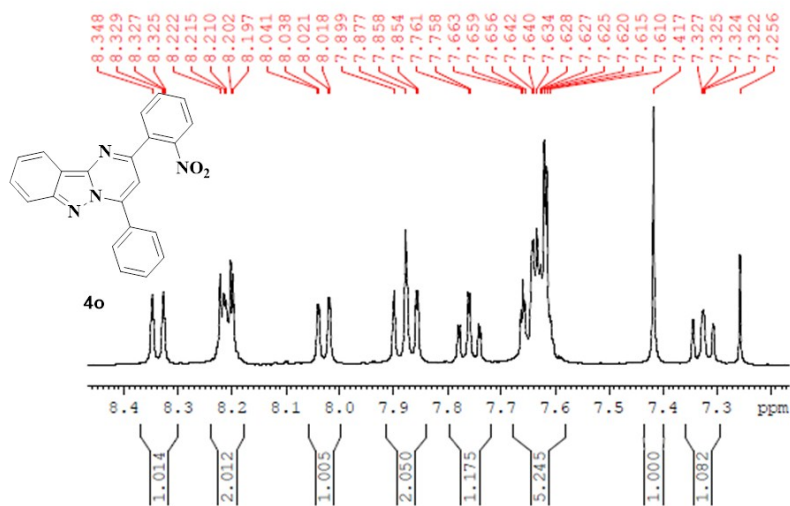

```
Current Data Parameters
NAME      Desktop
EXPNO    19
PROCNO   1

F2 - Acquisition Parameters
Date_    20150113
Time     12.08
INSTRUM  spect
PROBHD   5 mm F4BBO BB/
PULPROG  zg30
TD        65536
SOLVENT  CDCl3
NS        16
DS        2
SWH       8223.685 Hz
FIDRES    0.125483 Hz
AQ        3.9845889 sec
RG        156.91
EW        60.500 usec
DE        6.50 usec
TE        297.4 K
DL        1.00000000 sec
TDO       1

===== CHANNEL f1 =====
NUC1     1H
P1       14.25 usec
PLW1     14.0000000 W
SFOL     400.2604718 MHz

F2 - Processing parameters
SI       65536
SF       400.2580130 MHz
WDW      EM
SSB      0
GB       0.30 Hz
PC       1.00
```

### <sup>13</sup>C NMR spectrum of compound (4o):

Signature SIF VIT VELLORE  
JPR-248-P

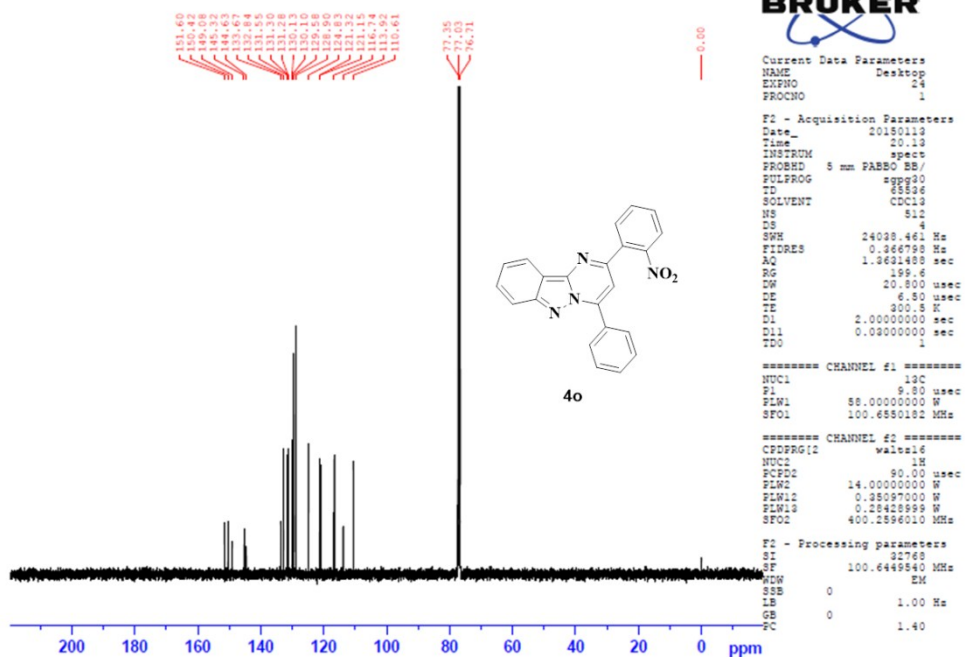

### HRMS spectrum of compound (4o):

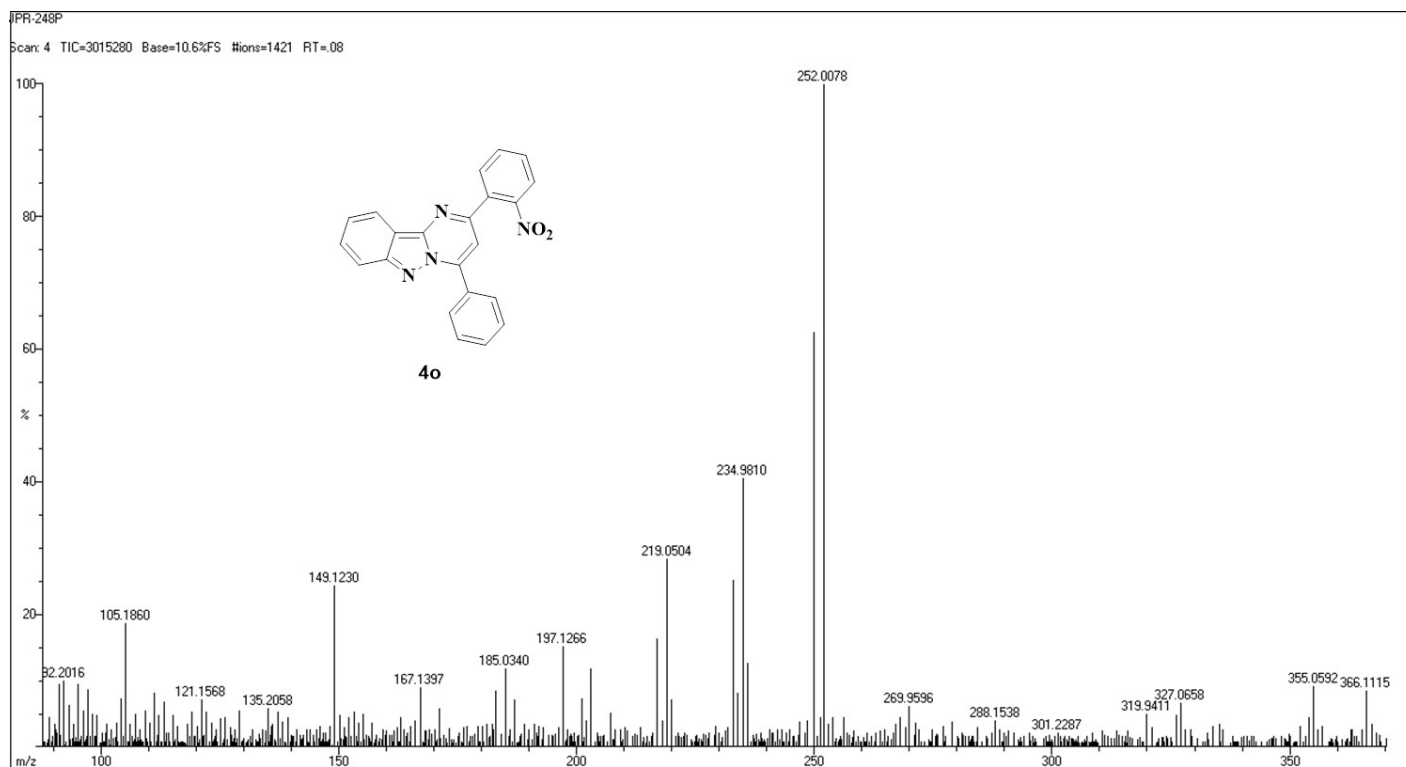



# <sup>1</sup>H NMR spectrum of compound (4p):

Signature SIF VIT VELLORE  
JPR-240-P

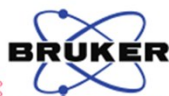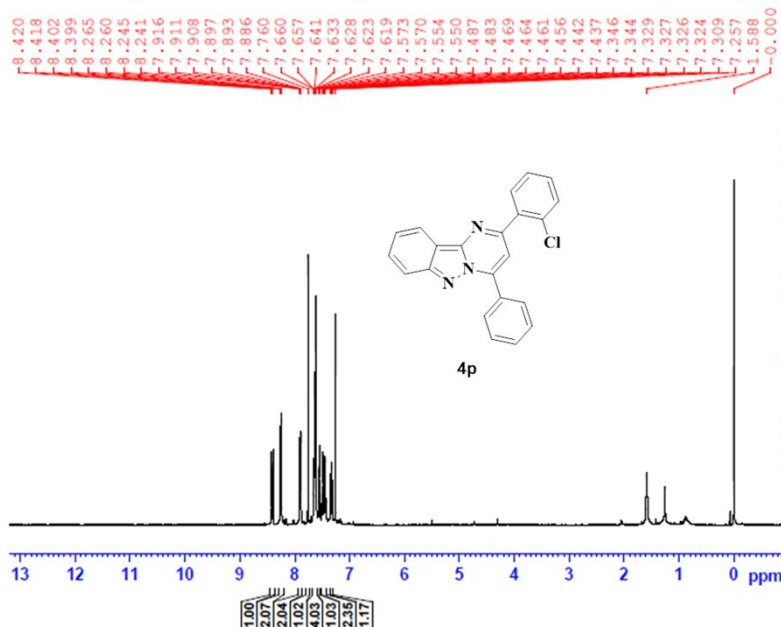

Current Data Parameters  
NAME Desktop  
EXPNO 9  
PROCNO 1

F2 - Acquisition Parameters  
Date\_ 20150106  
Time 15.40  
INSTRUM spect  
PROBHD 5 mm F4BBO BB/  
FULPROG zg30  
TD 65536  
SOLVENT CDCl3  
NS 16  
DS 2  
SWH 3223.655 Hz  
FIDRES 0.125403 Hz  
AQ 3.9545889 sec  
RG 175.97  
DM 60.800 usec  
DE 6.50 usec  
TE 296.3 K  
D1 1.0000000 sec  
TDO 1

==== CHANNEL f1 =====  
NUC1 1H  
P1 14.25 usec  
PLW1 14.00000000 W  
SFO1 400.2604718 MHz

F2 - Processing parameters  
SI 65536  
SF 400.2604718 MHz  
WDW EM  
SSB 0  
LB 0.30 Hz  
GB 0  
PC 1.00

# Expanded <sup>1</sup>H NMR spectrum of compound (4p):

Signature SIF VIT VELLORE  
JPR-240-P

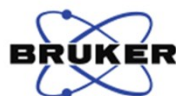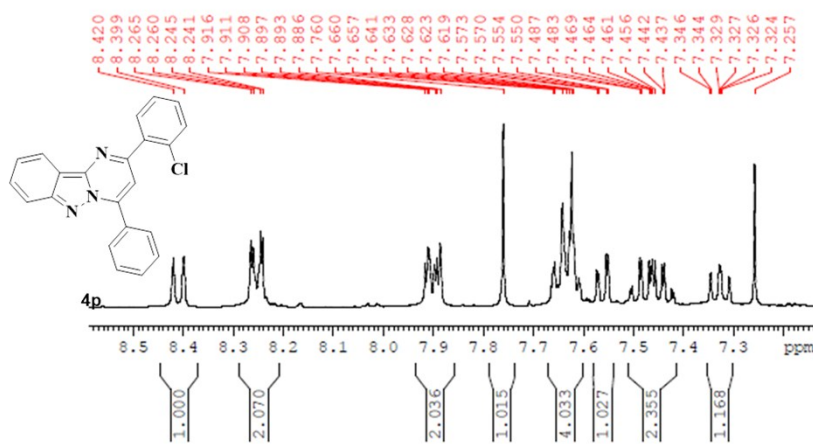

Current Data Parameters  
NAME Desktop  
EXPNO 9  
PROCNO 1

F2 - Acquisition Parameters  
Date\_ 20150106  
Time 15.40  
INSTRUM spect  
PROBHD 5 mm F4BBO BB/  
FULPROG zg30  
TD 65536  
SOLVENT CDCl3  
NS 16  
DS 2  
SWH 3223.655 Hz  
FIDRES 0.125403 Hz  
AQ 3.9545889 sec  
RG 175.97  
DM 60.800 usec  
DE 6.50 usec  
TE 296.3 K  
D1 1.0000000 sec  
TDO 1

==== CHANNEL f1 =====  
NUC1 1H  
P1 14.25 usec  
PLW1 14.00000000 W  
SFO1 400.2604718 MHz

F2 - Processing parameters  
SI 65536  
SF 400.2604718 MHz  
WDW EM  
SSB 0  
LB 0.30 Hz  
GB 0  
PC 1.00

### <sup>13</sup>C NMR spectrum of compound (4p):

Signature SIF VIT VELLORE  
JPR-240-P

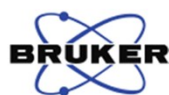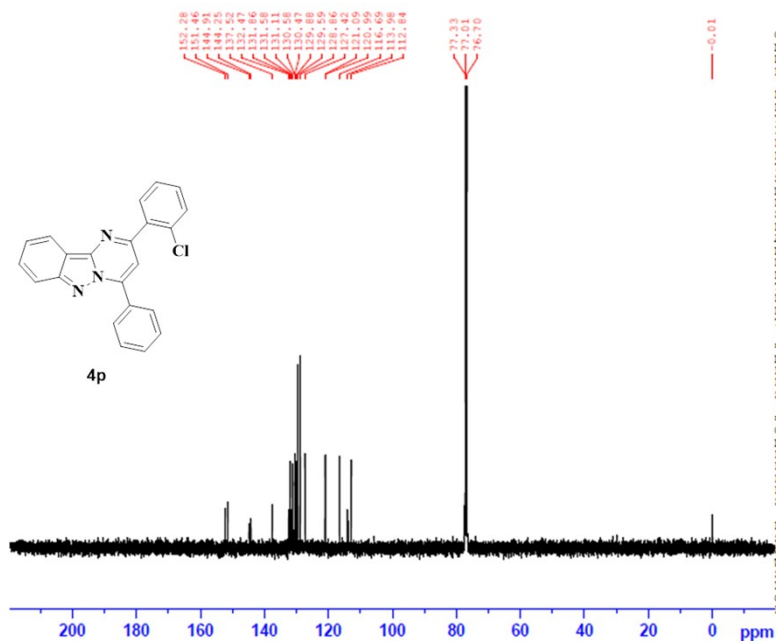

Current Data Parameters  
NAME Desktop  
EXPNO 13  
PROCNO 1

F2 - Acquisition Parameters  
Date\_ 20180106  
Time 22.57  
INSTRUM spect  
PROBHD 5 mm PABBO BB/  
PULPROG zgpg30  
TD 65536  
SOLVENT CDCl3  
NS 512  
DS 4  
SWH 24038.461 Hz  
FIDRES 0.366798 Hz  
AQ 1.362188 sec  
RG 175.97  
DM 20.800 usec  
DE 6.50 usec  
TE 302.8 K  
D1 2.0000000 sec  
D11 0.0300000 sec  
TDO 1

===== CHANNEL f1 =====  
NUC1 13C  
P1 9.80 usec  
PLW1 58.0000000 W  
SFO1 100.6250182 MHz

===== CHANNEL f2 =====  
CDDPRG2 waltz16  
NUC2 1H  
PCPD2 90.00 usec  
PLW2 14.0000000 W  
PLW3 0.2842899 W  
SFO2 400.2596010 MHz

F2 - Processing parameters  
SI 32768  
SF 100.6449840 MHz  
WDW EM  
SSB 0  
LB 1.00 Hz  
GB 0  
PC 1.40

### HRMS spectrum of compound (4p):

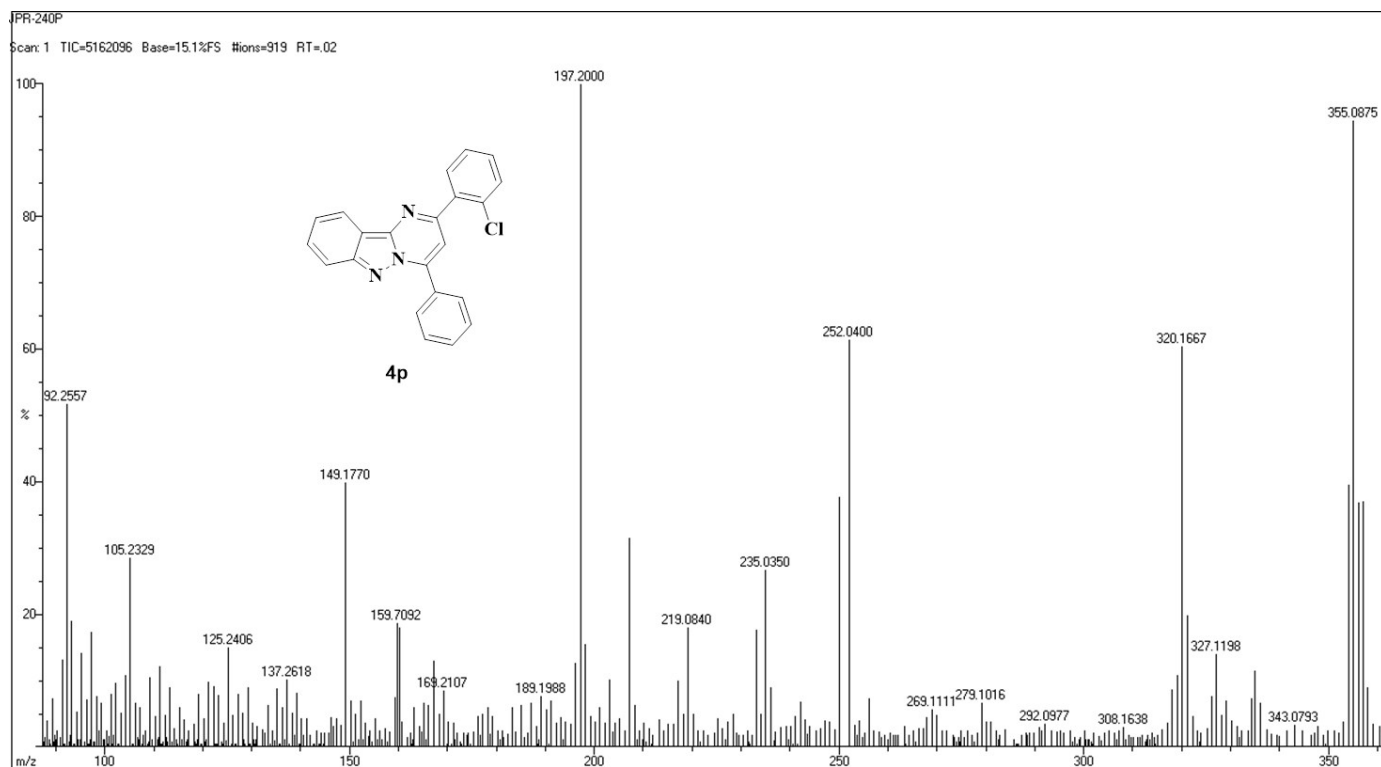

# <sup>1</sup>H NMR spectrum of compound (4q):

Signature SIF VIT VELLORE  
JPR-315-P

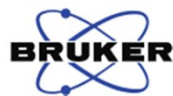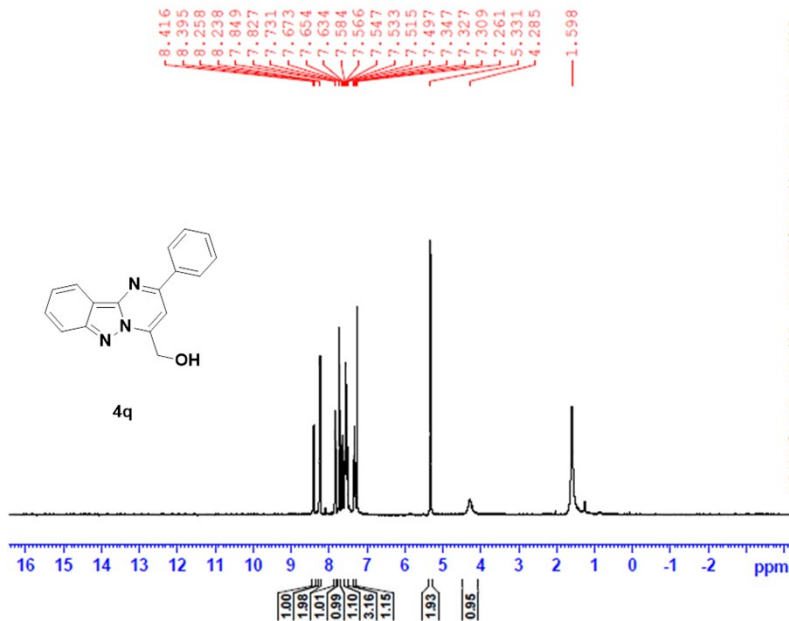

# Expanded <sup>1</sup>H NMR spectrum of compound (4q):

Signature SIF VIT VELLORE  
JPR-315-P

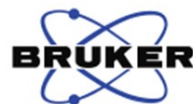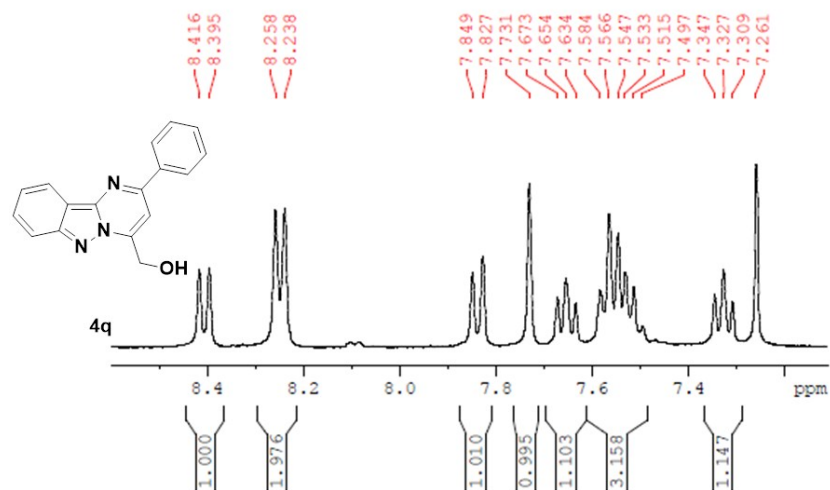

### <sup>13</sup>C NMR spectrum of compound (4q):

Signature SIF VIT VELLORE  
JPR-315-P

153.28  
151.50  
144.96  
137.18  
130.36  
129.16  
127.31  
121.31  
116.07  
113.82  
106.06  
77.33  
76.70  
61.16

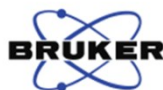

Current Data Parameters  
NAME Desktop  
EXPRO 29  
PROCNO 1

F1 - Acquisition Parameters  
Date\_ 20180614  
Time 20.48  
INSTRUM spect  
PROBHD 5 mm PABBO BB/  
PULPROG zgpg30  
TD 65536  
SOLVENT CDCl3  
MS 612  
DS 4  
SWH 24098.461 Hz  
FIDRES 0.266798 Hz  
AQ 1.849188 sec  
RG 199.6  
DM 20.800 usec  
DE 6.50 usec  
TE 302.0 K  
DL 2.0000000 sec  
Dl1 0.03000000 sec  
TDO 1

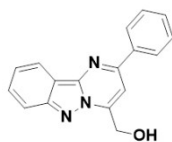

4q

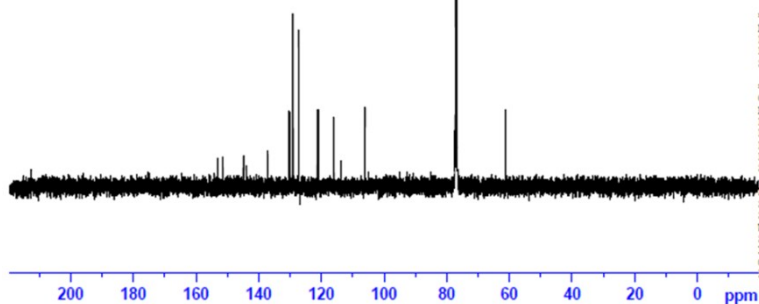

```
===== CHANNEL f1 =====
NUC1 13C
P1 130 usec
PLW1 58.0000000 W
SF01 100.6261012 MHz

===== CHANNEL f2 =====
CPDPRG12 waltz16
NUC2 1H
PCPD2 80.00 usec
PLW2 14.0000000 W
PLW12 0.25097000 W
PLW13 0.25428599 W
SF02 400.2536010 MHz

PT - Processing parameters
SI 32768
SF 100.6449540 MHz
WDW EM
SSB 0
LB 1.00 Hz
GB 0
PC 1.40
```

### HRMS spectrum of compound (4q):

Scan: 9 TIC=5638416 Base=100%FS #ions=1605 RT=.22

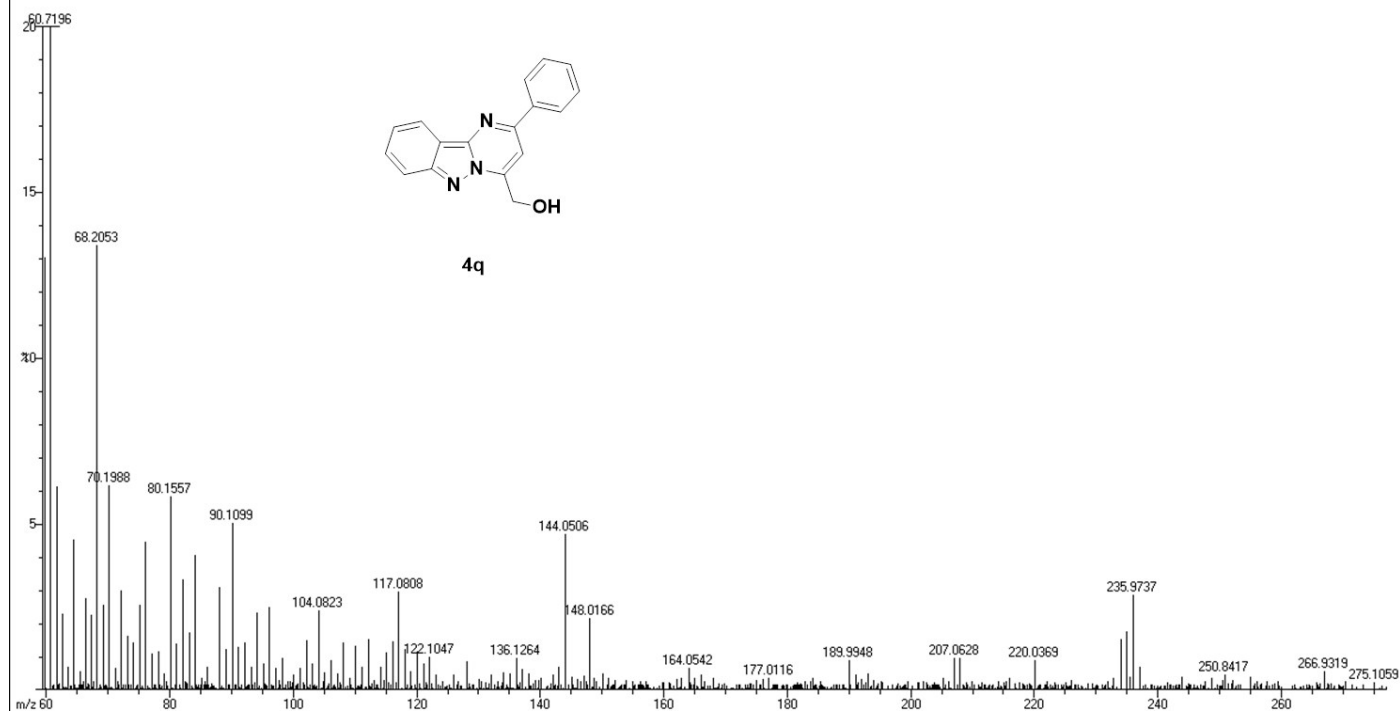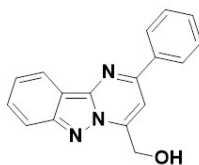

4q

# <sup>1</sup>H NMR spectrum of compound (4s):

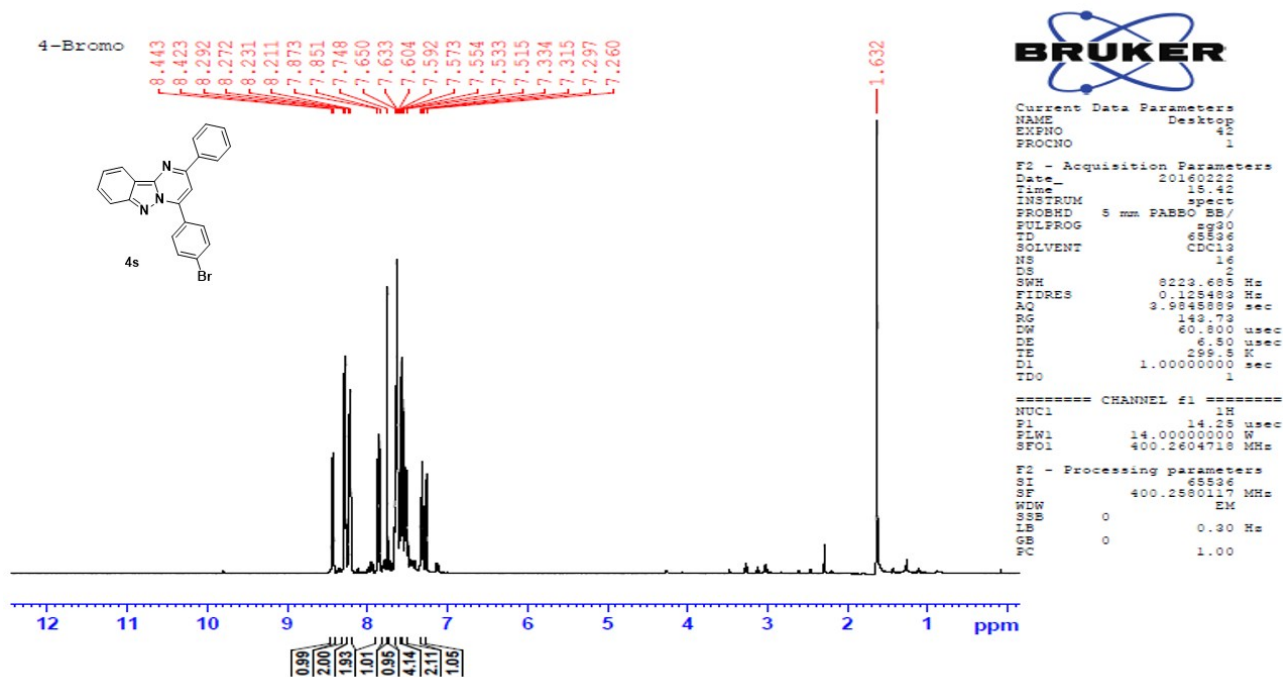

# Expanded <sup>1</sup>H NMR spectrum of compound (4s):

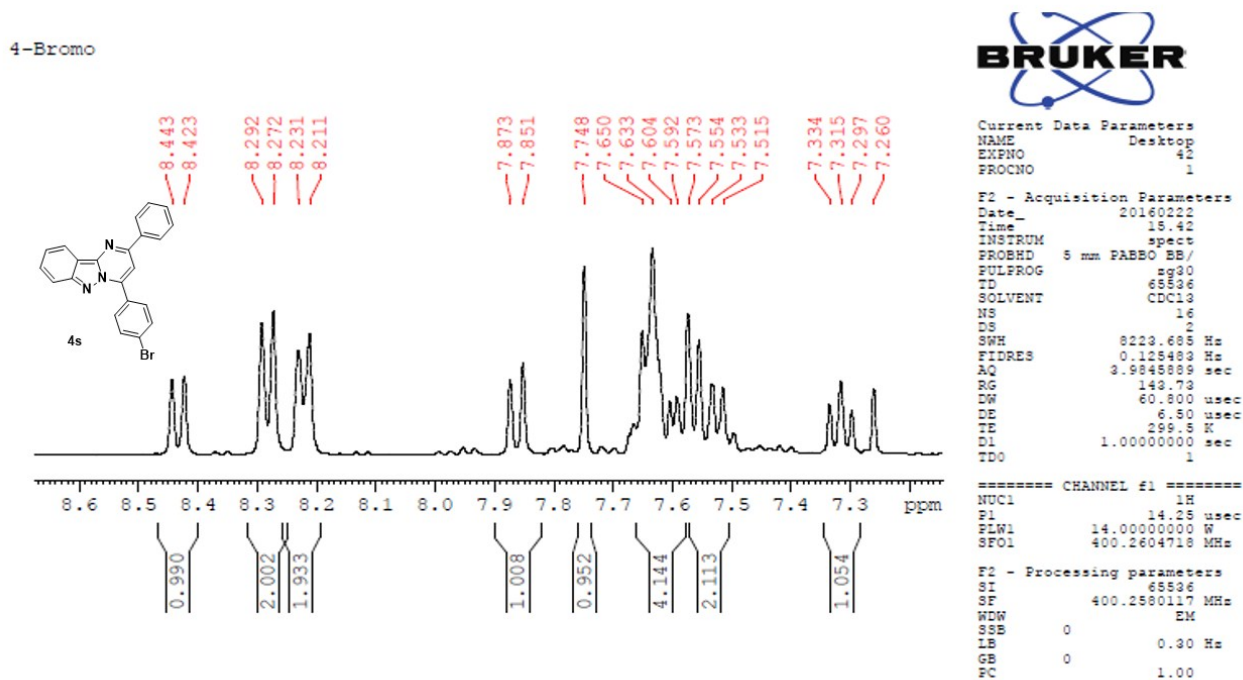

### <sup>13</sup>C NMR spectrum of compound (4s):

4-bromo

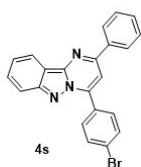

152.61  
151.62  
145.33  
145.03  
137.35  
131.84  
131.06  
130.17  
128.59  
128.57  
128.08  
128.88  
127.22  
121.26  
120.72  
116.59  
113.94  
108.67

77.86  
77.84  
76.73

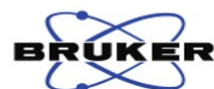

```
Current Data Parameters
NAME          78C
EXPNO        45
PROCNO       1

F2 - Acquisition Parameters
Date_        20160222
Time         23.00
INSTRUM      spect
PROBHD       5 mm PABBO BB/
PULPROG      zgpg30
TD           65536
SOLVENT      CDCl3
NS           512
DS           4
SWH          24098.461 Hz
FIDRES       0.266789 Hz
AQ           1.3621488 sec
RG           209.888
SQ           20.8000 usec
DE           6.50 usec
TE           298.2 K
DEL          2.0000000 sec
D1           0.030000000 sec
D11          0.030000000 sec
TDO         1

===== CHANNEL f1 =====
NUC1         13C
P1           9.80 usec
PLW1         55.0000000 W
SFO1         100.6250182 MHz

===== CHANNEL f2 =====
CPDPRG12    waltz16
NUC2         1H
PCPD2       90.00 usec
PLW2         14.0000000 W
PLW12        0.35597000 W
PLW13        0.35592899 W
SFO2         400.2599010 MHz

F2 - Processing parameters
SI          32768
SF          100.6250184 MHz
WDW         EM
SSB         0
LB          1.00 Hz
GB          0
OC          1.40
```

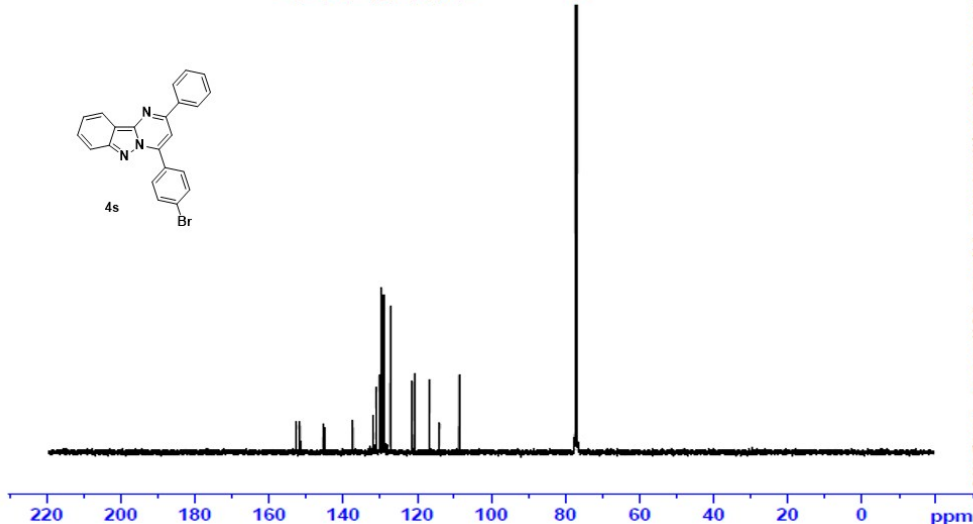

### HRMS spectrum of compound (4s):

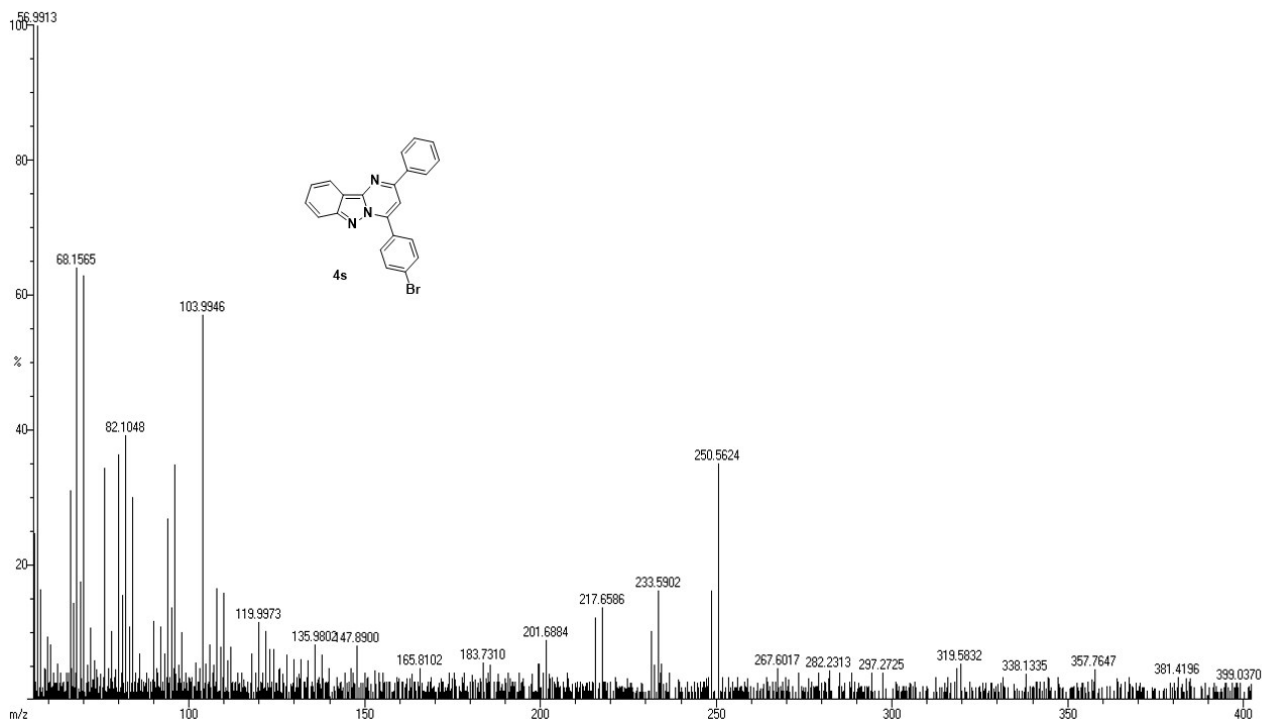

# <sup>1</sup>H NMR spectrum of compound (4t):

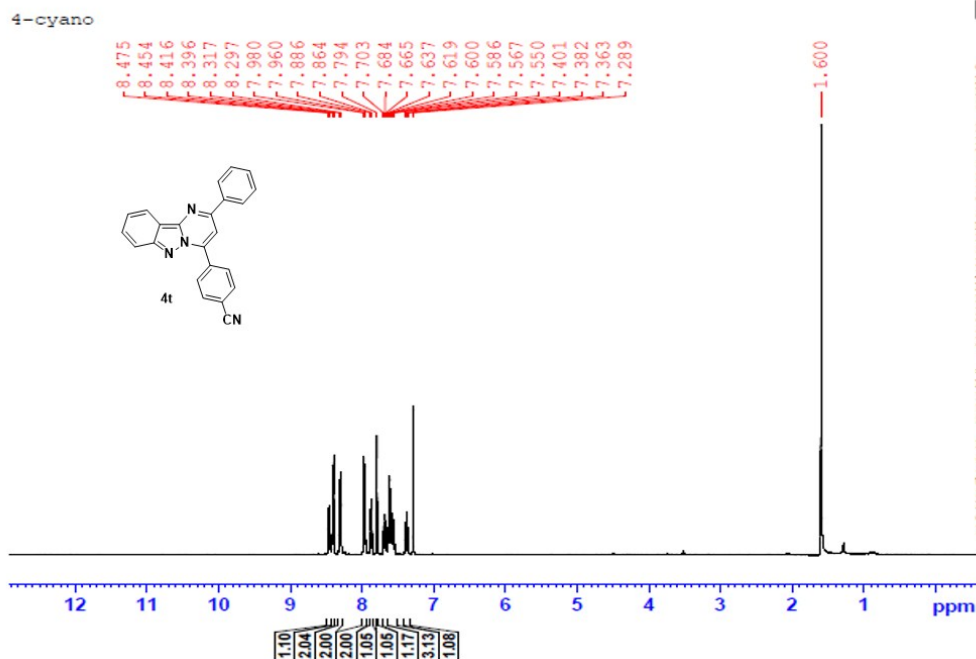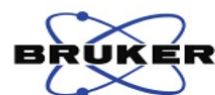

```

Current Data Parameters
NAME          RSC
EXPNO        31
PROCNO       1

F2 - Acquisition Parameters
Date_        20160219
Time         20.14
INSTRUM      spect
PROBHD       5 mm FAPBO BB/
PULPROG      zg30
TD           65536
SOLVENT      CDCl3
NS           16
DS           2
SWH          8223.686 Hz
FIDRES       0.125483 Hz
AQ           3.9845889 sec
RG           199.6
DE           60.800 usec
TE           300.3 K
D1           1.00000000 sec
TDO          1

===== CHANNEL #1 =====
NUC1          1H
P1            14.25 usec
PLW1          14.00000000 W
SFOL          400.2604718 MHz

F2 - Processing parameters
SI            65536
SF            400.2580000 MHz
WDW           EM
SSB           0
LB            0.30 Hz
GB            0
FC            1.00
    
```

# Expanded <sup>1</sup>H NMR spectrum of compound (4t):

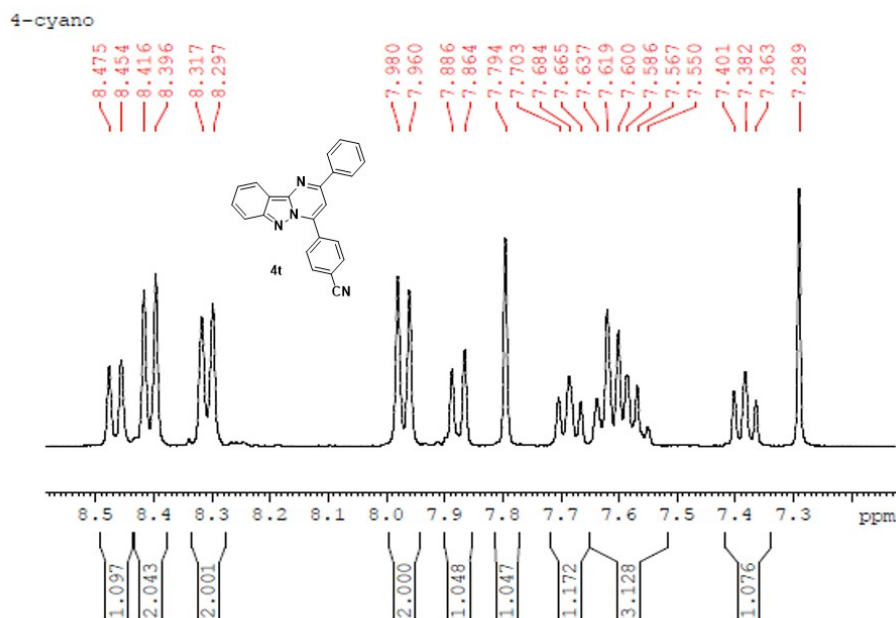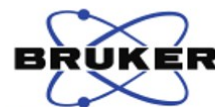

```

Current Data Parameters
NAME          RSC
EXPNO        31
PROCNO       1

F2 - Acquisition Parameters
Date_        20160219
Time         20.14
INSTRUM      spect
PROBHD       5 mm FAPBO BB/
PULPROG      zg30
TD           65536
SOLVENT      CDCl3
NS           16
DS           2
SWH          8223.686 Hz
FIDRES       0.125483 Hz
AQ           3.9845889 sec
RG           199.6
DE           60.800 usec
TE           300.3 K
D1           1.00000000 sec
TDO          1

===== CHANNEL #1 =====
NUC1          1H
P1            14.25 usec
PLW1          14.00000000 W
SFOL          400.2604718 MHz

F2 - Processing parameters
SI            65536
SF            400.2580000 MHz
WDW           EM
SSB           0
LB            0.30 Hz
GB            0
FC            1.00
    
```

### <sup>13</sup>C NMR spectrum of compound (4t):

4-cyano

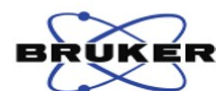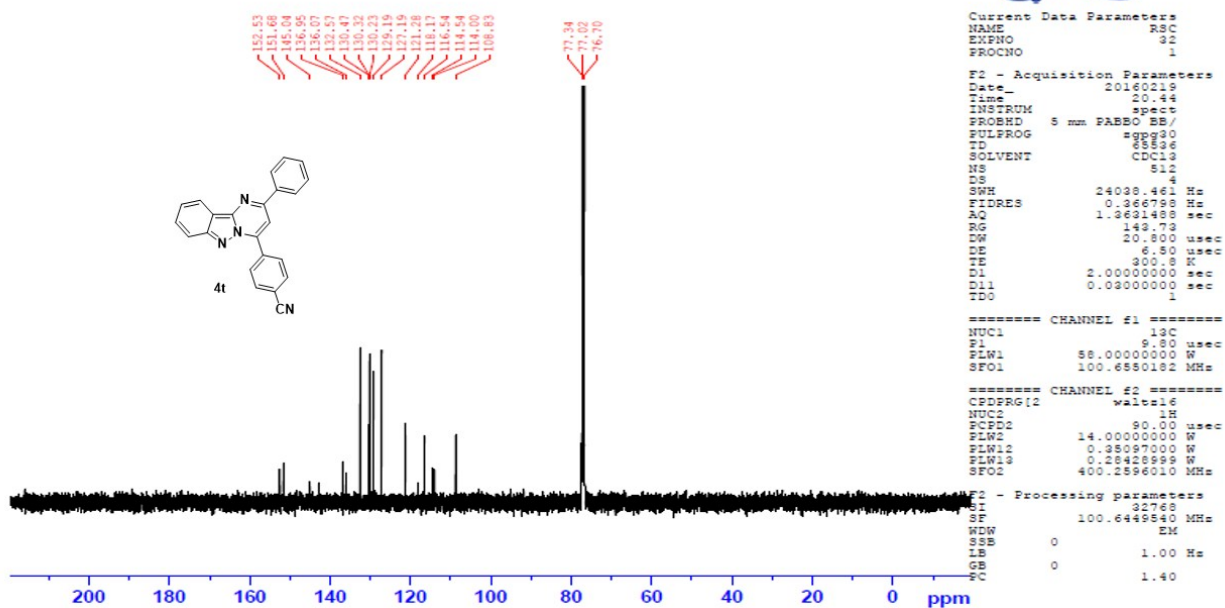

### HRMS spectrum of compound (4t):

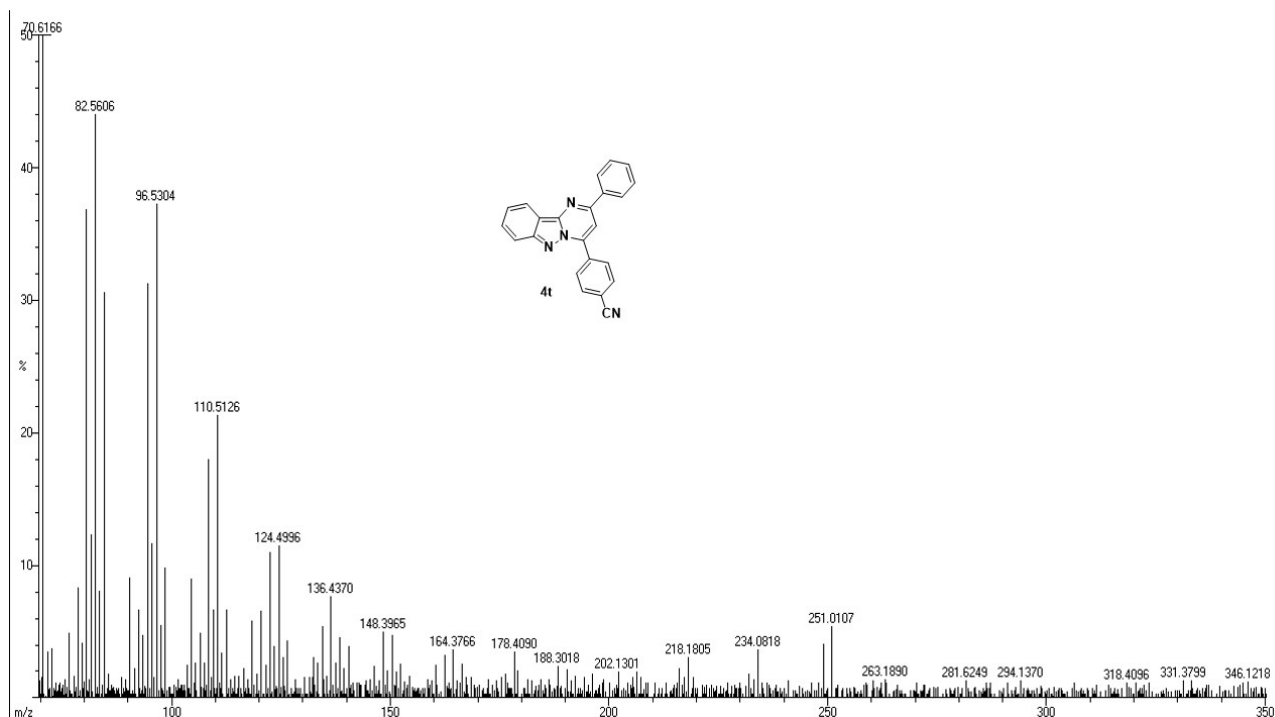



# <sup>1</sup>H NMR spectrum of compound (4u):

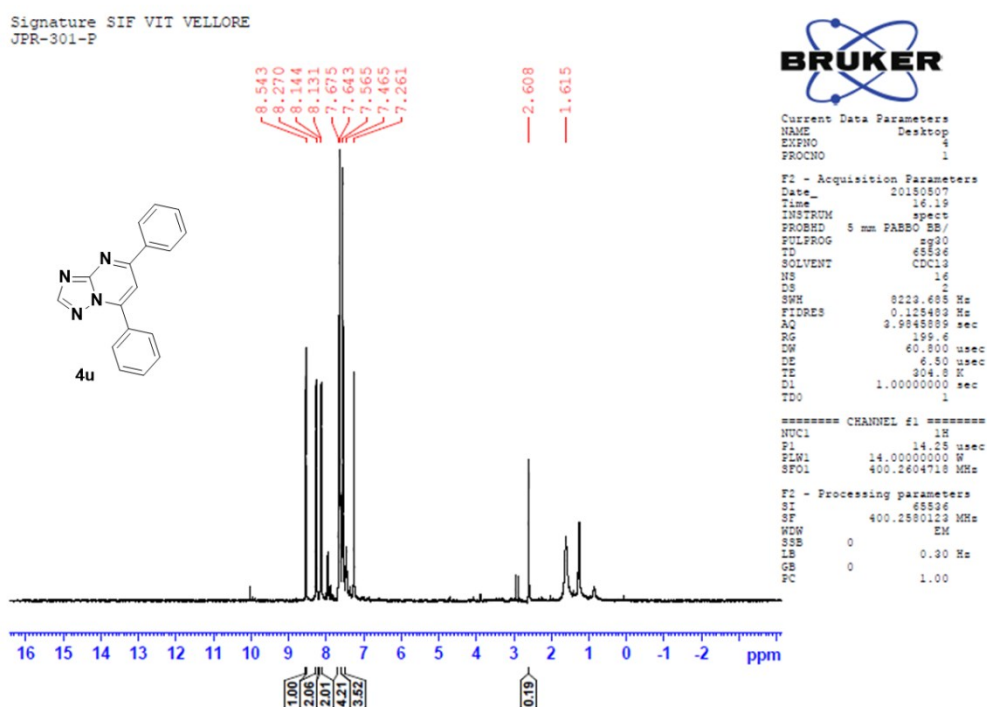

# Expanded <sup>1</sup>H NMR spectrum of compound (4u):

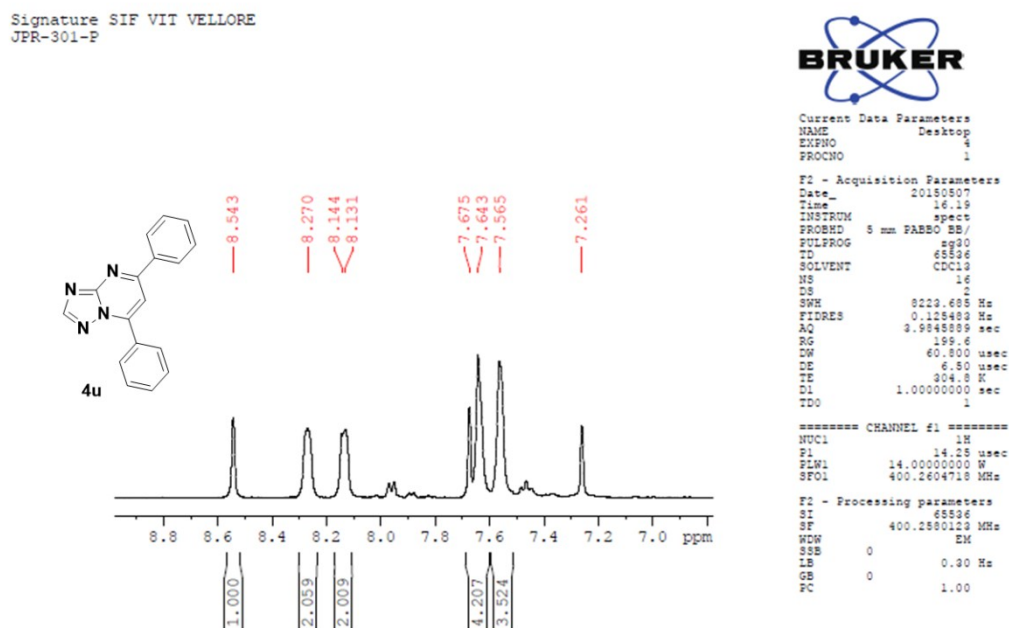

## <sup>13</sup>C NMR spectrum of compound (4u):

Signature SIF VIT VELLORE  
JPR-301-P

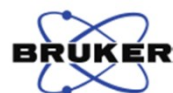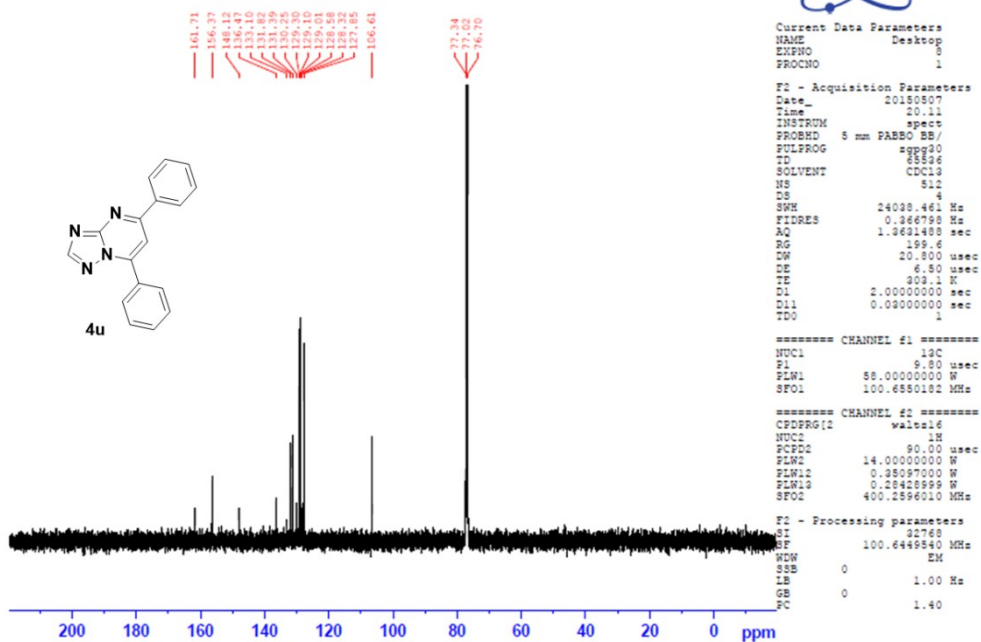

## HRMS spectrum of compound (4u):

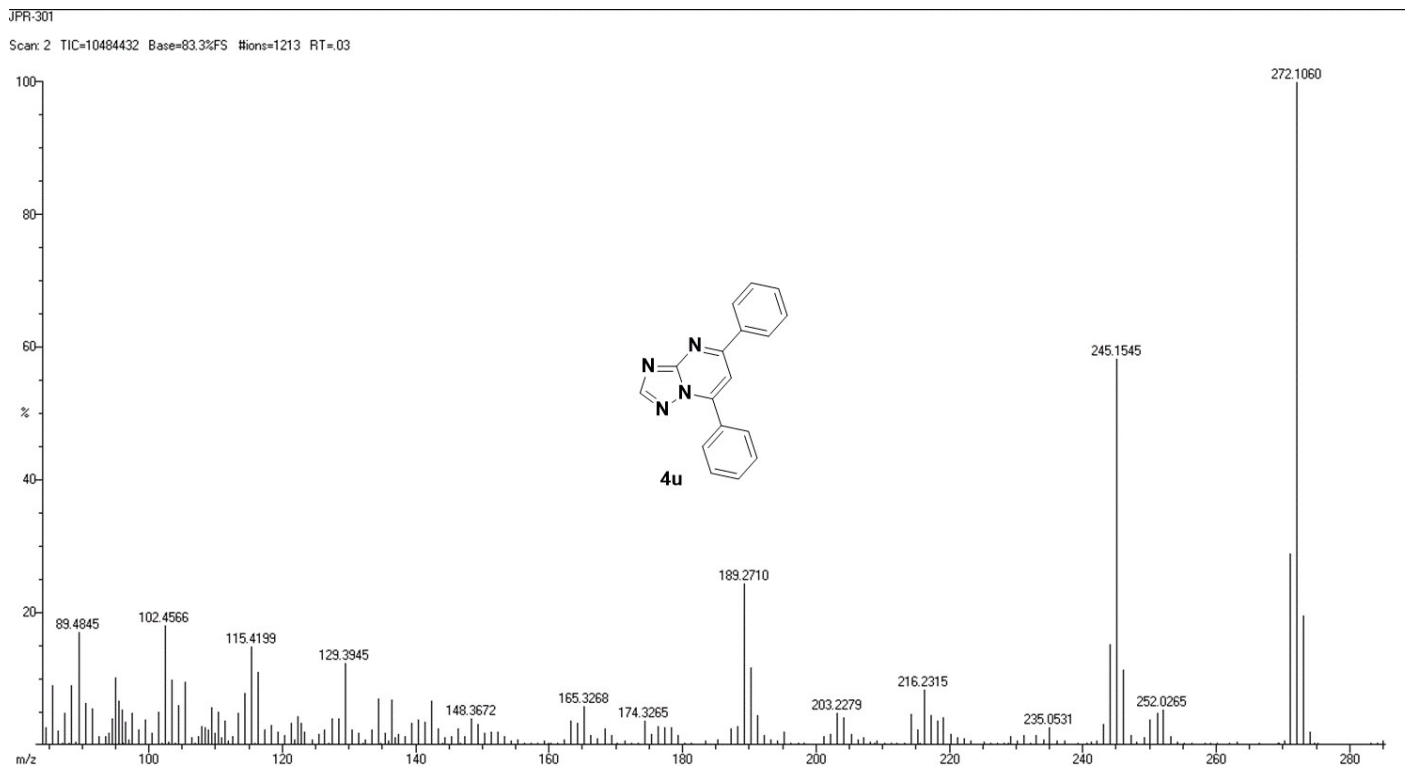

# <sup>1</sup>H NMR spectrum of compound (4v):

Signature SIF VIT VELLORE  
JPR-306-P

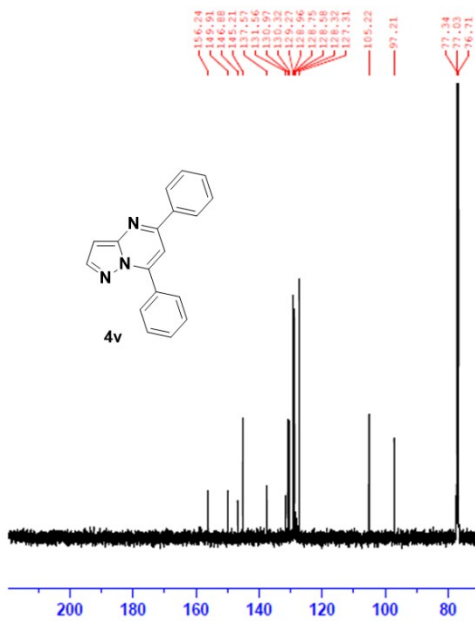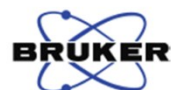

Current Data Parameters  
NAME Desktop  
EXPNO 7  
PROCNO 1

F2 - Acquisition Parameters  
Date\_ 20180507  
Time 20.42  
INSTRUM spect  
PROBHD 5 mm F4BBO BB/  
PULPROG zgpg30  
TD 65536  
SOLVENT CDCl3  
NS 512  
DS 4  
SWH 24008.461 Hz  
FIDRES 0.366798 Hz  
AQ 1.3631488 sec  
RG 199.6  
DF 20.800 usec  
DE 6.50 usec  
TE 303.2 K  
DL 2.00000000 sec  
D11 0.03000000 sec  
TDO 1

===== CHANNEL f1 =====  
NUC1 13C  
P1 9.80 usec  
PLW1 58.00000000 W  
SFO1 100.6280182 MHz

===== CHANNEL f2 =====  
CPDPRG12 waltz16  
NUC2 1H  
PCPD2 90.00 usec  
PLW2 14.00000000 W  
PLW12 0.35097000 W  
PLW13 0.35428998 W  
SFO2 400.2596010 MHz

F2 - Processing parameters  
SI 32768  
SF 100.6449540 MHz  
WDW EM  
SSB 0  
LB 1.00 Hz  
GB 0  
PC 1.40

# Expanded <sup>1</sup>H NMR spectrum of compound (4v):

Signature SIF VIT VELLORE  
JPR-306-P

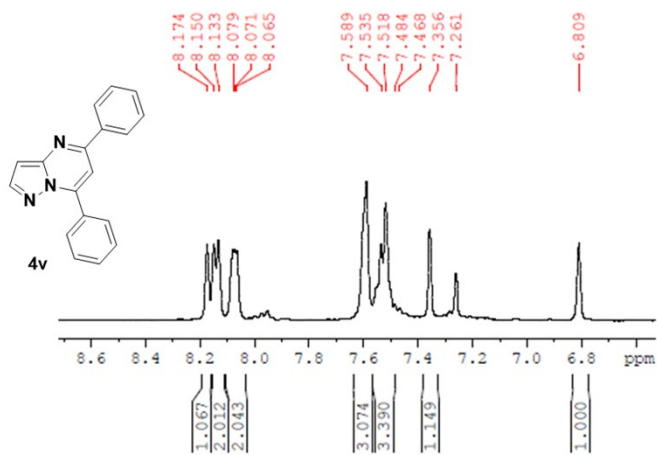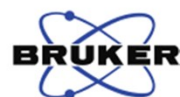

Current Data Parameters  
NAME Desktop  
EXPNO 7  
PROCNO 1

F2 - Acquisition Parameters  
Date\_ 20180507  
Time 16.48  
INSTRUM spect  
PROBHD 5 mm F4BBO BB/  
PULPROG zg30  
TD 65536  
SOLVENT CDCl3  
NS 16  
DS 1  
SWH 8229.685 Hz  
FIDRES 0.125483 Hz  
AQ 3.9845889 sec  
RG 199.6  
DF 60.800 usec  
DE 6.50 usec  
TE 303.2 K  
DL 1.00000000 sec  
TDO 1

===== CHANNEL f1 =====  
NUC1 1H  
P1 14.25 usec  
PLW1 14.00000000 W  
SFO1 400.2604718 MHz

F2 - Processing parameters  
SI 65536  
SF 400.25960126 MHz  
WDW EM  
SSB 0  
LB 0.30 Hz  
GB 0  
PC 1.00

**<sup>13</sup>C NMR spectrum of compound (4v):**

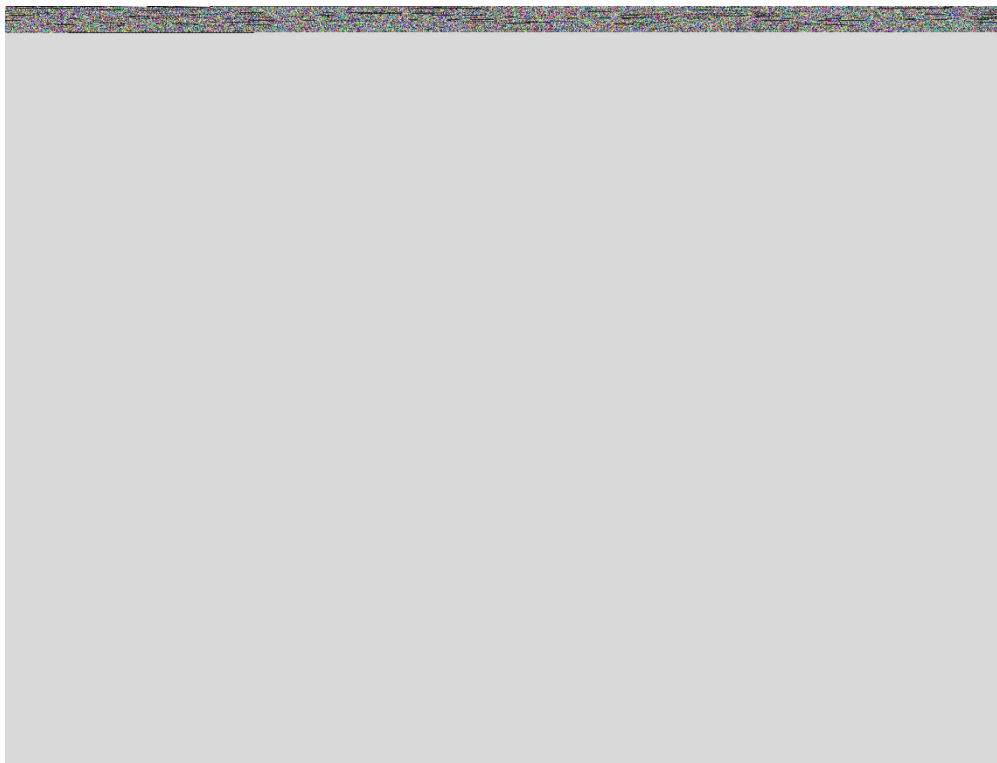

**HRMS spectrum of compound (4v):**

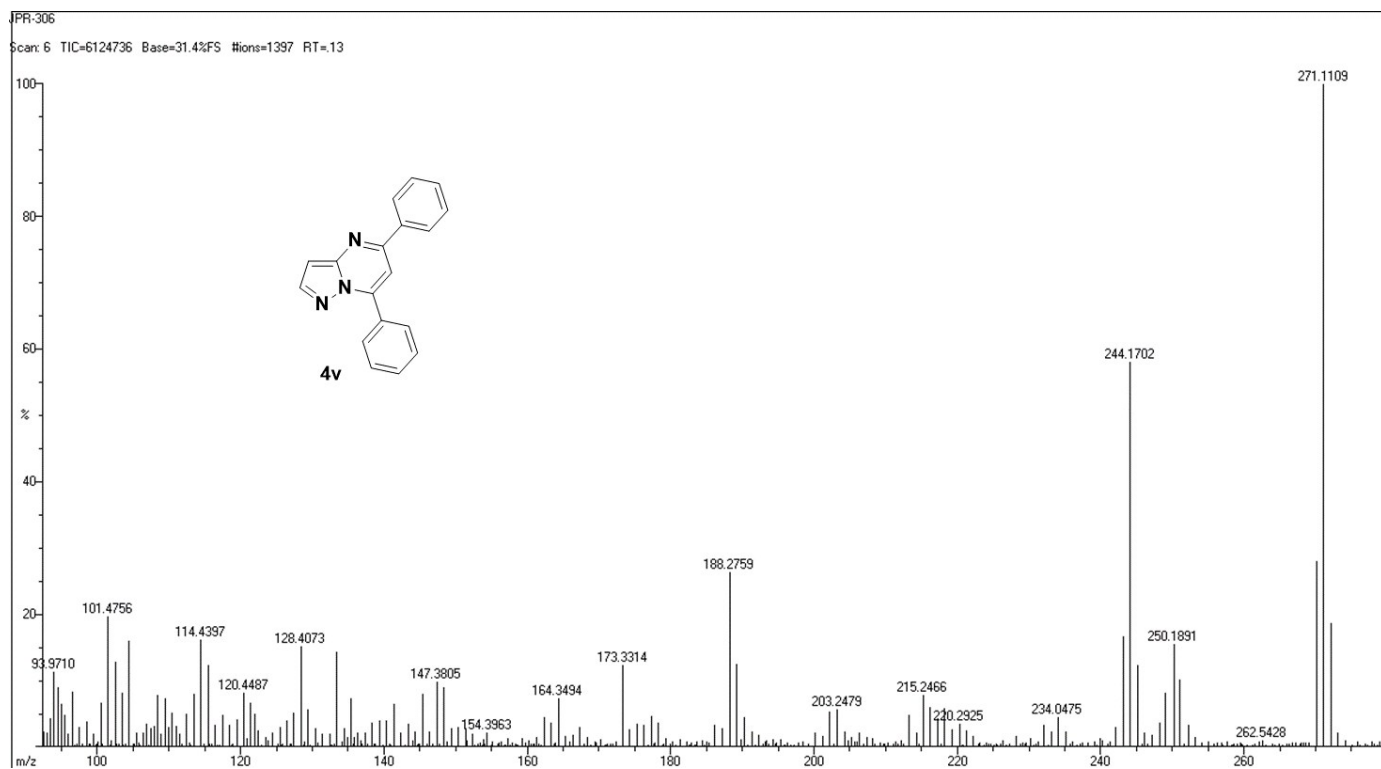

# <sup>1</sup>H NMR spectrum of compound (4w):

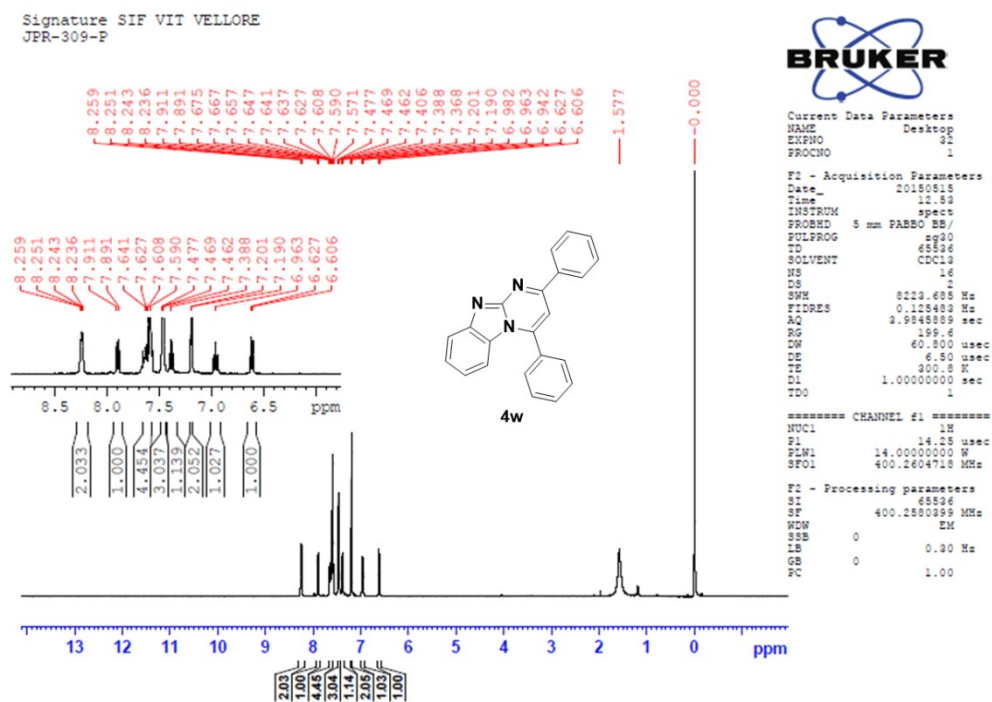

# <sup>13</sup>C NMR spectrum of compound (4w):

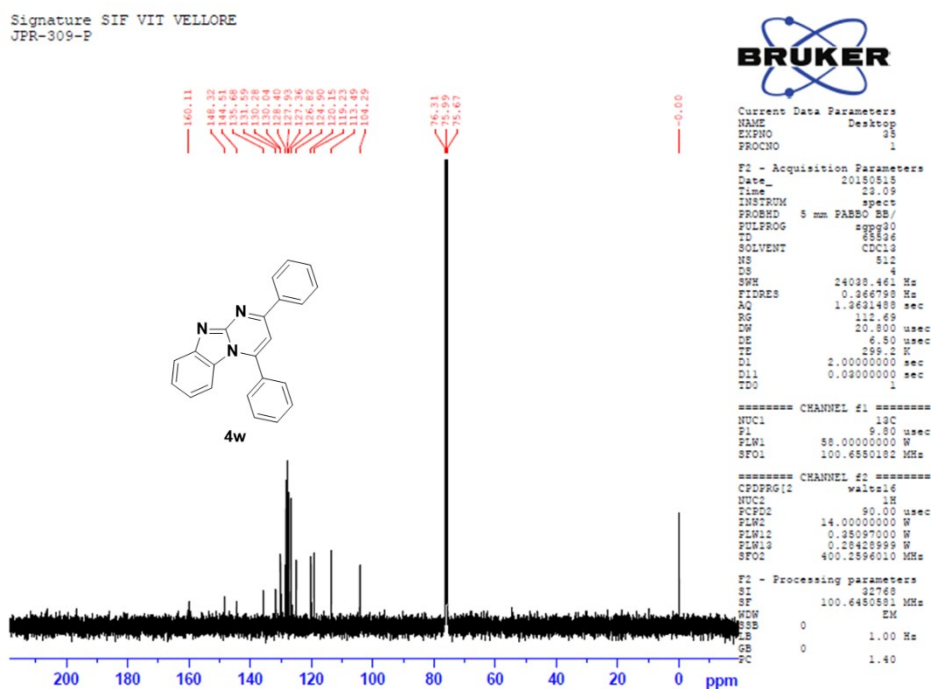

# HRMS spectrum of compound (4w):

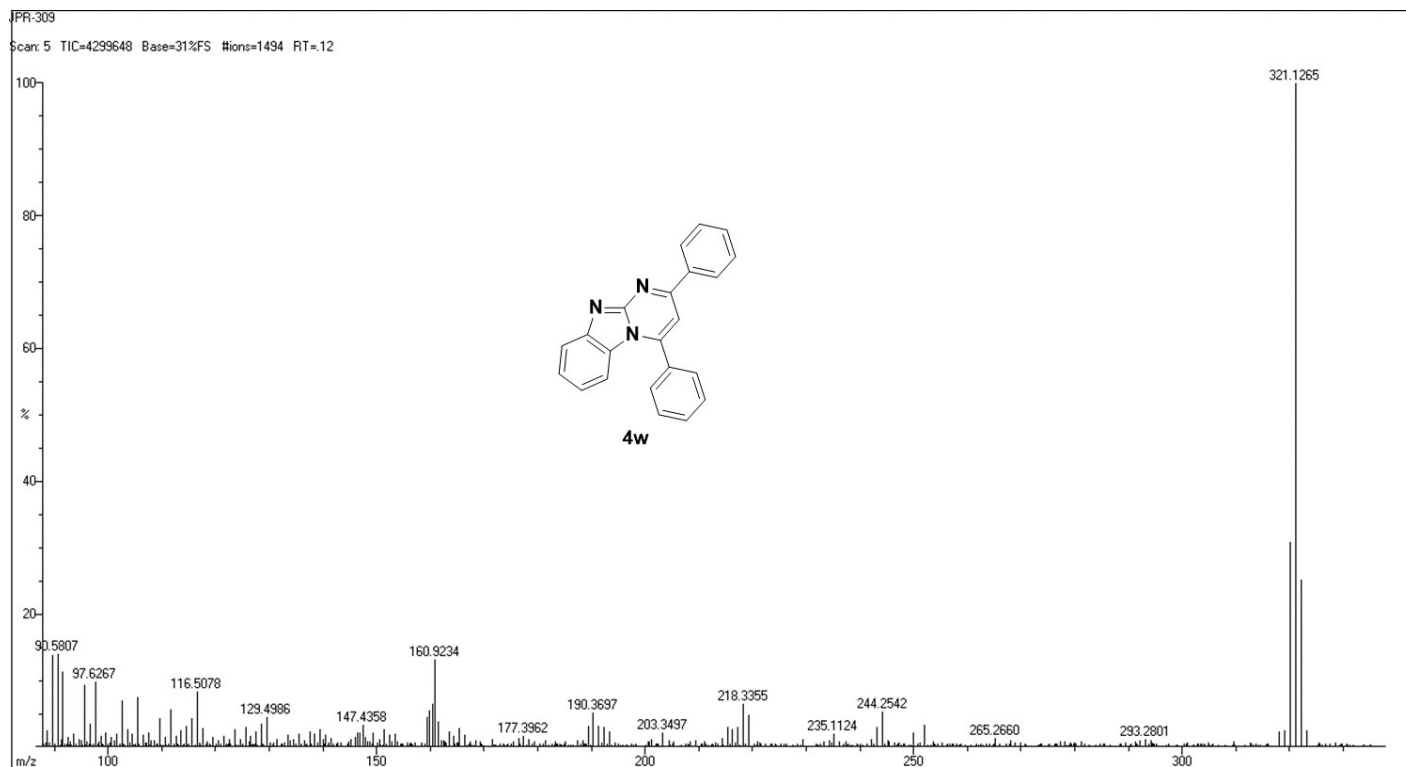

Supplement: c6ra02596j1.pdf [file c6ra02596j1.pdf]
